# Supplementary material for: Design of substituted tetrahydrofuran derivatives for HIV-1 protease inhibitors: synthesis, biological evaluation, and X-ray structural studies
Source: Royal Society of Chemistry journal article supplement (doi:10.1039/d4ob00506f), 2024-01-01
Supplement: d4ob00506f1.pdf [file d4ob00506f1.pdf]

Supplementary Material (ESI) for Organic and Biomolecular Chemistry

## **Design of Substituted Tetrahydrofuran Derivatives for HIV-1 Protease Inhibitors: Synthesis, Biological Evaluation, and X-ray Structural Studies**

Arun K. Ghosh\*, Daniel Lee, Ashish Sharma, Megan E. Johnson, Ajay K. Ghosh, Yuan-Fang Wang, Johnson Agniswamy, Masayuki Amano, Shin-ichiro Hattori, Irene T. Weber, and Hiroaki Mitsuya

### Table of Contents

|                                                                                   |          |
|-----------------------------------------------------------------------------------|----------|
| General Methods.....                                                              | S2       |
| X-ray crystallographic methods and data Table 1.....                              | S2-S4    |
| Enzyme Kinetics; Virus and cell biology.....                                      | S5       |
| Copies of <sup>1</sup> H- and <sup>13</sup> C-NMR Spectra of final compounds..... | S6 – S50 |
| HRMS spectra of all Compounds.....                                                | S51– S74 |
| HPLC table and Data of all final compounds.....                                   | S75– S99 |

## General Methods.

All chemicals and reagents were purchased from commercial suppliers and used without further purification unless otherwise noted. The following reaction solvents were distilled prior to use: dichloromethane from calcium hydride, diethyl ether and tetrahydrofuran from Na/benzophenone, methanol and ethanol from activated magnesium under argon. All reactions were carried out under an argon atmosphere in either flame or oven-dried (120 °C) glassware. TLC analysis was conducted using glass-backed Thin-Layer Silica Gel Chromatography Plates (60 Å, 250 µm thickness, F-254 indicator). Column chromatography was performed using 230-400 mesh, 60 Å pore diameter silica gel. <sup>1</sup>H and <sup>13</sup>C NMR spectra were recorded at room temperature on a Bruker AV800, DRX-500 and ARX-400. Chemical shifts ( $\delta$  values) are reported in parts per million, and are referenced to the deuterated residual solvent peak. NMR data is reported as:  $\delta$  value (chemical shift, *J*-value (Hz), integration, where s = singlet, d = doublet, t = triplet, q = quartet, brs = broad singlet). Optical rotations were recorded on a Perkin Elmer 341 polarimeter. HRMS and LRMS spectra were recorded at the Purdue University Department of Chemistry Mass Spectrometry Center. HPLC analysis and purification was done on an Agilent 1100 series instrument using a YMC Pack ODS-A column of 4.6 mm ID for analysis and either 10 mm ID or 20 mm ID for purification. The purity of test compounds was determined by HRMS and HPLC analysis. All test compounds showed  $\geq 90\%$  purity.

## Expression and purification of protease species

Expression and purification of protease were carried out as previously described [1]. Briefly, Rosetta (DE3) pLysS strain (Novagen) was transformed with an expression vector (pET-30a), which contained the genes of wild-type HIV-1<sup>NL4-3</sup>-PR (PR<sup>WT</sup>) using heat-shock. The culture was grown in a shake flask containing 30 mL of Luria broth plus kanamycin and chloramphenicol (LB<sup>Km+/Cp+</sup>) at 37°C overnight. In the expression of PR<sup>WT</sup>, twenty milliliter of the grown culture was added to 1 L of ZYM-10052 [1.0% N-Z amine, 0.5% yeast extract, 25 mM disodium hydrogenphosphate, 25 mM potassium dihydrogenphosphate, 50 mM ammonium chloride, 5 mM sodium sulfate, 1.0% glycerol, 0.05% glucose, 0.2%  $\alpha$ -lactose, 2 mM magnesium sulphate] plus kanamycin and chloramphenicol (ZYM-10052<sup>Km+/Cp+</sup>). The ZYM-10052<sup>Km+/Cp+</sup> culture was further continued at 37°C for 20~22 hours. Then the culture was spun down for pellet collection, and thus-obtained pellets were stored at -80 °C until use. For purification of PR<sup>WT</sup>, the pellet was resuspended in buffer A [20 mM Tris, 1 mM EDTA, and 1 mM DTT] and lysed with sonication. The cell lysates were separated into a supernatant fraction and an inclusion body fraction with centrifugation. PR<sup>WT</sup> was confirmed to be present in the inclusion body fraction, which was washed five times with buffer A containing 2 M urea and then with buffer A without urea. The twice-washed pellet was solubilized and PRs were unfolded with 100 mM formic acid (pH 2.8). The unfolded PRs were purified using the fast protein liquid chromatography system (ÄKTA pure 25; GE Healthcare) and separated using the reverse phase chromatography column (RESOURS RPC 3 mL; GE Healthcare) using the gradient of buffer B [1.0% formic acid, 2.0% acetonitrile] and buffer C [1% formic acid, 70% acetonitrile]. The flow rate was set to 1.0 mL min<sup>-1</sup> and the column was equilibrated with 75% buffer B and 25% buffer C. Then, the amount of buffer C was increased to 75% over a 30 min period (10-time the column volume). PR<sup>WT</sup> was eluted with 35~50% buffer C. After the elution, buffer C amount was increased to 100% in 6 min and returned to the starting condition over the next 6 min. The peak fractions including PR<sup>WT</sup> were collected and three-time diluted with buffer B. The diluted PR<sup>WT</sup> solution was injected into the ÄKTA pure 25 again and the targeted PR<sup>WT</sup> was purified using the same purification step as described above. The collected fractions containing PR<sup>WT</sup> were subjected to desalting (HiTrap Desalting; GE Healthcare) and the eluted solution was equilibrated using 100 mM formic acid and stored at -80 °C until use.

The unfolded PR<sup>WT</sup> was refolded with the addition of a neutralizing buffer A [100 mM ammonium acetate pH 6.0, 0.005% Tween-20], making the final pH 5.0 to 5.2. The PR<sup>WT</sup>-containing solution was run through Amicon Ultra-15 10K centrifugal filter units (Millipore), giving a solution containing PR (5~8 mg/ml) in 10 mM ammonium acetate pH 5.0 and 0.005% Tween-20. Occasionally, twice greater concentrations of a test compound were used for crystallization. After centrifugation, the supernatants were collected and subjected to crystallization using the hanging-drop vapor diffusion method. Nextal Tubes ProComplex Suite (QIAGEN) and Wizard Crystallization Screen Series (Emerald BioSystems) were used for the first screening to determine the optimum crystallization condition.

**Table S1: Crystallographic Data Collection and Refinement Statistics**

|                                              | PR/compound <b>4I</b> (GRL-072-17A) |
|----------------------------------------------|-------------------------------------|
| Space group                                  | P2 <sub>1</sub> 2 <sub>1</sub> 2    |
| Unit cell dimensions: (Å)                    |                                     |
| a                                            | 58.57                               |
| b                                            | 85.88                               |
| c                                            | 46.31                               |
| Resolution range (Å)                         | 50-1.32 (1.37-1.32)                 |
| Redundancy (final shell)                     | 5.8 (4.8)                           |
| Unique reflections                           | 51438 (3856)                        |
| Completeness (%) overall (final shell)       | 93.6 (71.5)                         |
| R <sub>merge</sub> (%) overall (final shell) | 8.9 (51.2)                          |
| I/σ(I) overall (final shell)                 | 17.1 (3.9)                          |
| Refinement                                   |                                     |
| R (%)                                        | 13.2                                |
| R <sub>free</sub> (%)                        | 16.4                                |
| No. of solvent atoms                         | 232                                 |
| RMS deviation from ideality                  |                                     |
| Bonds (Å)                                    | 0.019                               |
| Angle (degree)                               | 2.2                                 |
| Average B-factors (Å <sup>2</sup> )          |                                     |
| Whole chain atoms                            | 16.4                                |
| Inhibitor                                    | 13.5                                |
| Solvent                                      | 25.4                                |

**Figure S1: 2Fo-Fc electron density map showing two alternative conformations of inhibitor 4I.** The 2Fo-Fc electron density map (gray) for inhibitor **4I** in the X-ray structure with HIV protease is contoured at a level of 1 sigma. The carbon atoms are shown in green for conformation A and in yellow for conformation B of inhibitor with relative occupancies of 0.55 and 0.45.

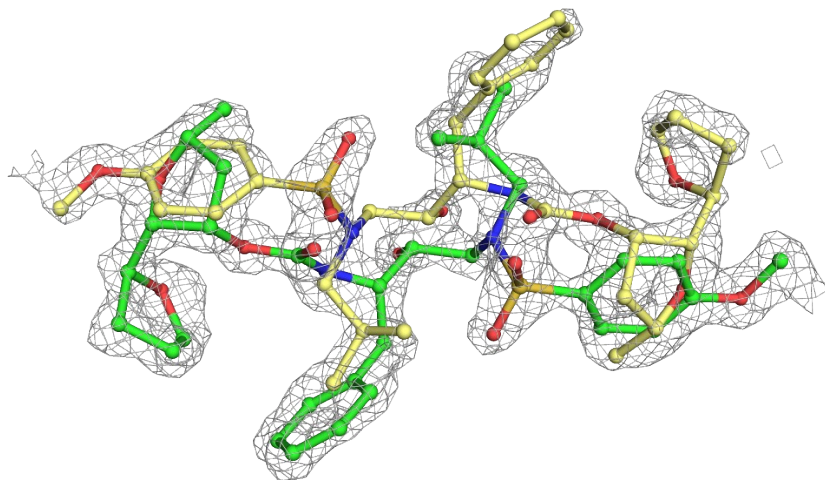

### Geometric Criteria for Weak Interactions.

Hydrogen bond interactions are defined by standard geometrical criteria as described in [1, 2]. The geometric criteria for weak interactions are: C-H...O (distance between C and O  $\leq 3.5$  Å, angle  $\geq 90^\circ$ ), O-H... $\pi$  (distance  $\leq 4.3$  Å to centroid of  $\pi$  system, angle  $\geq 120^\circ$ ), C-H... $\pi$  (distance  $\leq 4.5$  Å, angle  $\geq 120^\circ$ ) [1-3], lone pair (n)- $\pi$  as C=O... $\pi$  (distance is between 2.8 to 3.8 Å to center of  $\pi$  system, angle between two planes  $\leq 90^\circ$ ) [4] and  $\pi$ - $\pi$  stacking [5].

### References

- (1) Manfred S. Weiss, Maria Brandl, Jürgen Sühnel, Debnath Pal and Rolf Hilgenfeld, “More hydrogen bonds for the (structural) biologist”; *Trends Biochem. Sci.* **2001**, *9*, 521-523.
- (2) Baker, E.N. and Hubbard, R.E. Hydrogen bonding in globular proteins. *Prog. Biophys. Mol. Biol.* **1984**, *44*, 97–179
- (3) Brandl, M. et al. (2001) C–H ...  $\pi$  interactions in proteins. *J. Mol. Biol.* **2001**, *307*, 357–377
- (4) Prakash Panwaria and Alope Das. Understanding the n  $\rightarrow$   $\pi^*$  non-covalent interaction using different experimental and theoretical approaches. *Phys. Chem. Chem. Phys.* **2022**, *24*, 22371-22389
- (5) Mutasem Sinnokrot, Charles David Sherrill, Highly Accurate Coupled Cluster Potential Energy Curves for the Benzene Dimer: Sandwich, T-Shaped, and Parallel-Displaced Configurations. *J. Phys. Chem. A* **2004**, *108*, 46, 10200–10207.

**HIV-1 Protease inhibitory assay.** The assay is based upon reported procedure (1). Fluorescence measurements were made using PerkinElmer LS-50B Luminescence Spectrophotometer. Ten microliters of a stock solution (0.05 mg/mL) of HIV protease were incubated with five different concentrations of substrate 2-(aminobenzoyl)-Thr-Ile-Nle-Phe(p-NO<sub>2</sub>)-Gln-ArgNH<sub>2</sub> (K<sub>m</sub> = 37 at 37 °C with the increase in fluorescence monitored. A stock solution of 1 mM substrate in DMSO was diluted to 0.1 mM with assay buffer and used for the assay. All k<sub>cat</sub> and K<sub>m</sub> values were obtained employing standard data fitting techniques for a reaction obeying Michaelis-Menten kinetics. The data curves were fitted using SigmaPlot. The active enzyme concentrations were calculated from the intercept of the linear fit to the IC<sub>50</sub> versus [S] plots with the IC<sub>50</sub> axis. The K<sub>i</sub> values were obtained from the IC<sub>50</sub> values estimated from an inhibitor dose-response curve with the spectroscopic assay using the equation  $K_i = (IC_{50} - [E]/2)/(1 + [S]/K_m)$ , where [E] and [S] are the PR and substrate concentrations, respectively. The K<sub>i</sub> values were measured at four to five substrate concentrations. The measurements were repeated at least three times to produce the average values given in Table 3.

**Cells, viruses, and antiviral agents.** The MT-2 cells were obtained from the NIH AIDS Reagent Program, NIAID, NIH, Bethesda, MD, USA (2). Human CD4<sup>+</sup> MT-2 cells were grown in RPMI-1640-based culture medium supplemented with 10% fetal calf serum (FCS: JRH Biosciences, Lenexa, MD), 50 unit/mL penicillin, and 100 µg/mL of kanamycin (3,4). Darunavir (DRV) was synthesized as previously described (5).

- (1) Toth, M. V.; Marshall, G. R. *International Journal of Peptide and Protein Research*. **1990**, *36*, 544–550.
- (2) Haertle, T., et al. “Metabolism and Anti-Human Immunodeficiency Virus-1 Activity of 2-Halo-2', 3'-Dideoxyadenosine Derivatives.” *J. Biol. Chem.* **1988**, *263*, 5870-5875.
- (3) Yoshimura, K., et al. *Proc. Natl. Acad. Sci. USA* **1999**, *96*, 8675-8680.
- (4) Koh, Y., et al. *Antimicrob. Agents Chemother.* **2009**, *53*, 987-996.
- (5) Ghosh, A. K., Leshchenko, S., Noetzel, M. “Stereoselective Photochemical 1,3-Dioxolane Addition to 5-Alkoxyethyl-2(5*H*)-furanone: Synthesis of Bis-tetrahydrofuranyl Ligand for HIV Protease Inhibitor UIC-94017 (TMC-114)” *J. Org. Chem.* **2004**, *69*, 7822-7829

<sup>1</sup>H NMR (500 MHz, CDCl<sub>3</sub>)

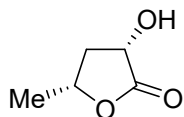

**6**

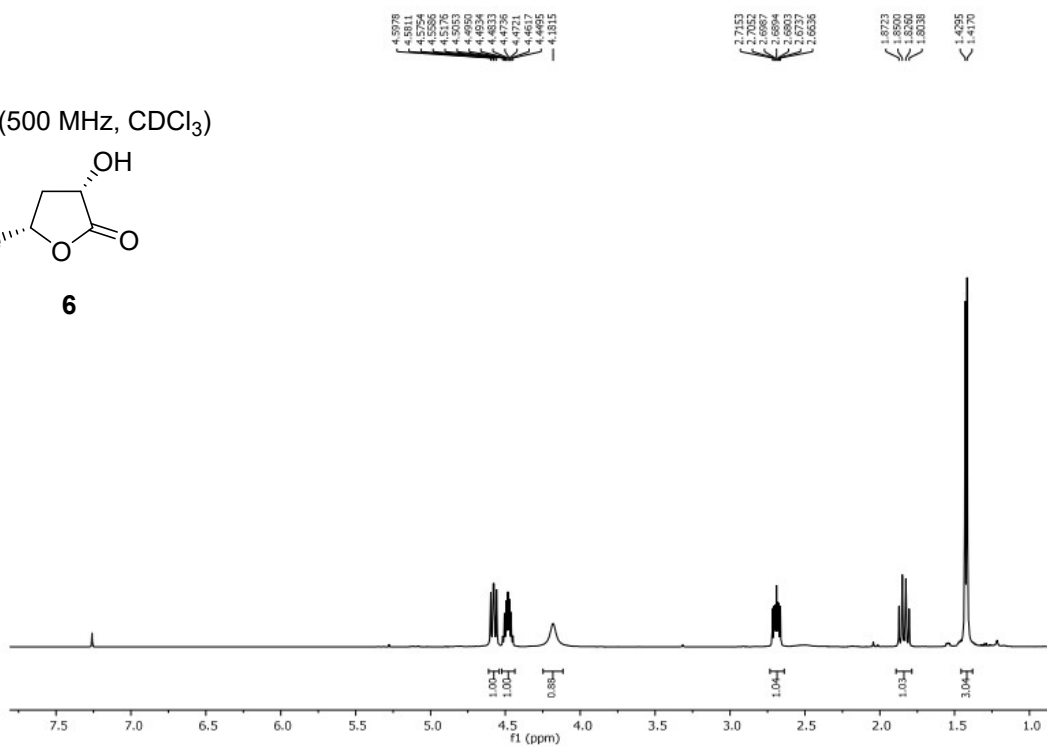

<sup>13</sup>C NMR (125 MHz, CDCl<sub>3</sub>)

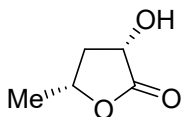

**6**

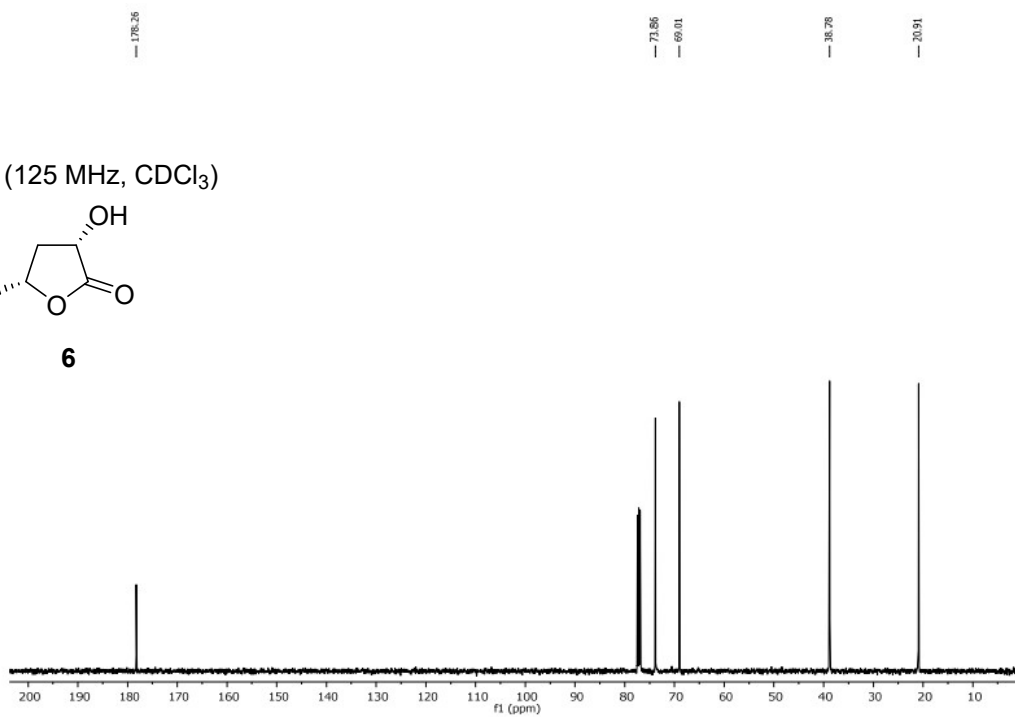

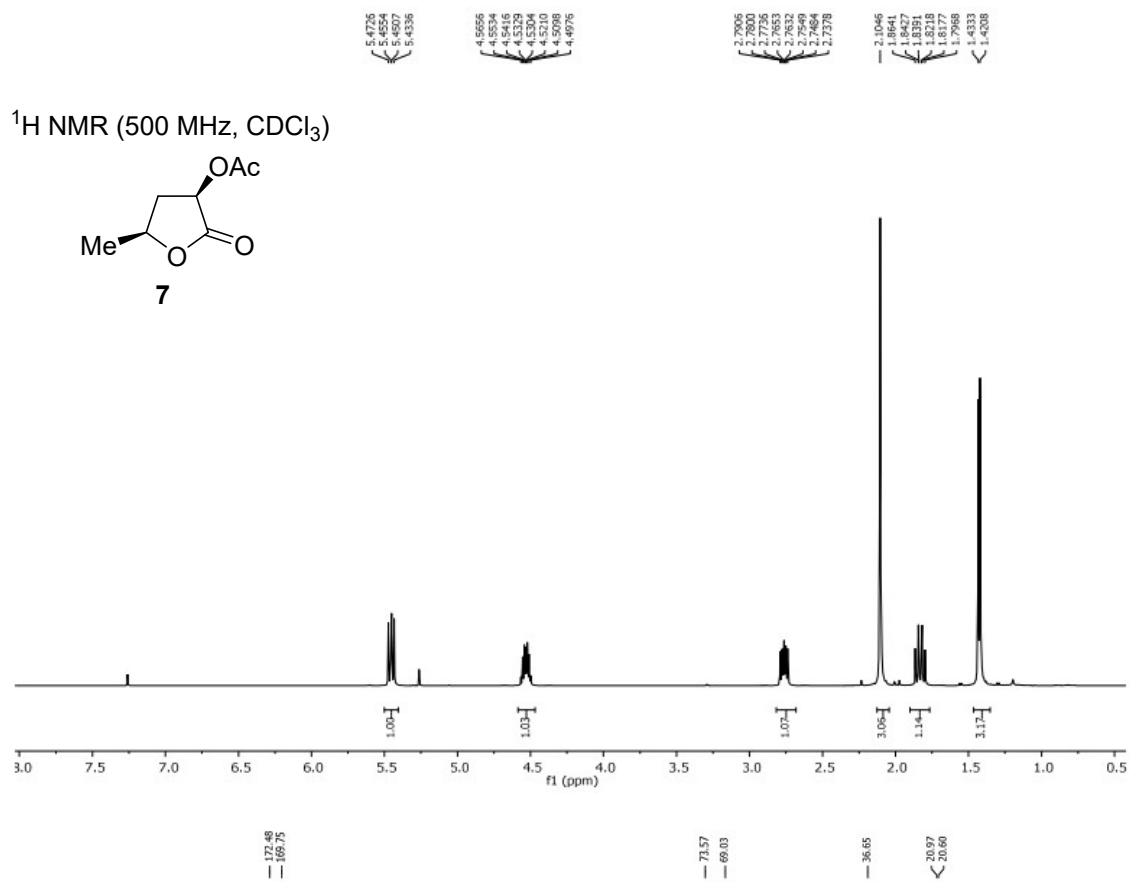

<sup>13</sup>C NMR (125 MHz, CDCl<sub>3</sub>)

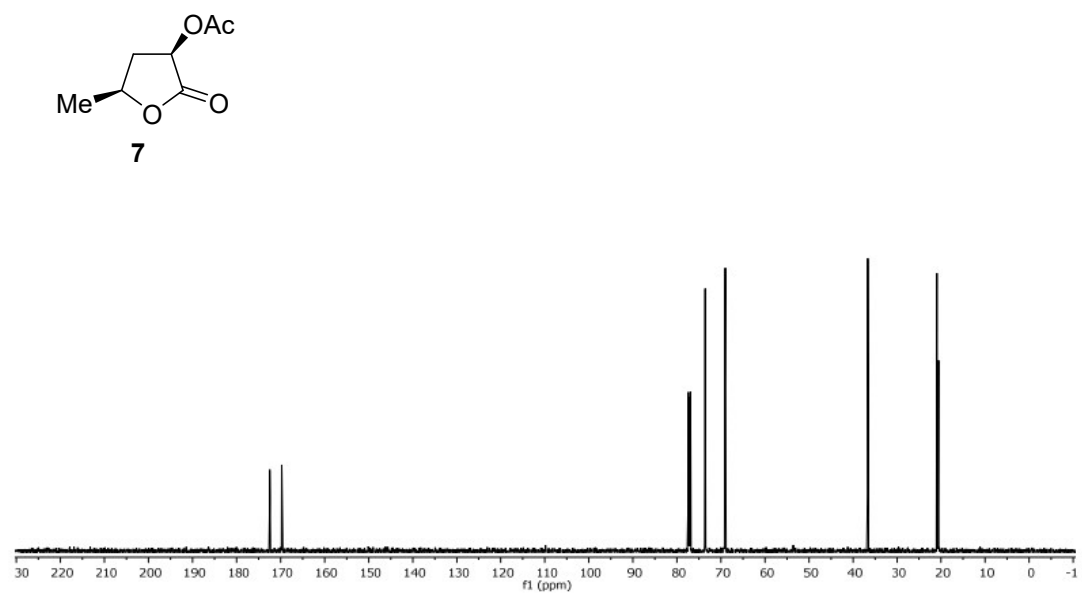

<sup>1</sup>H NMR (500 MHz, CDCl<sub>3</sub>)

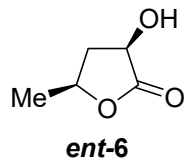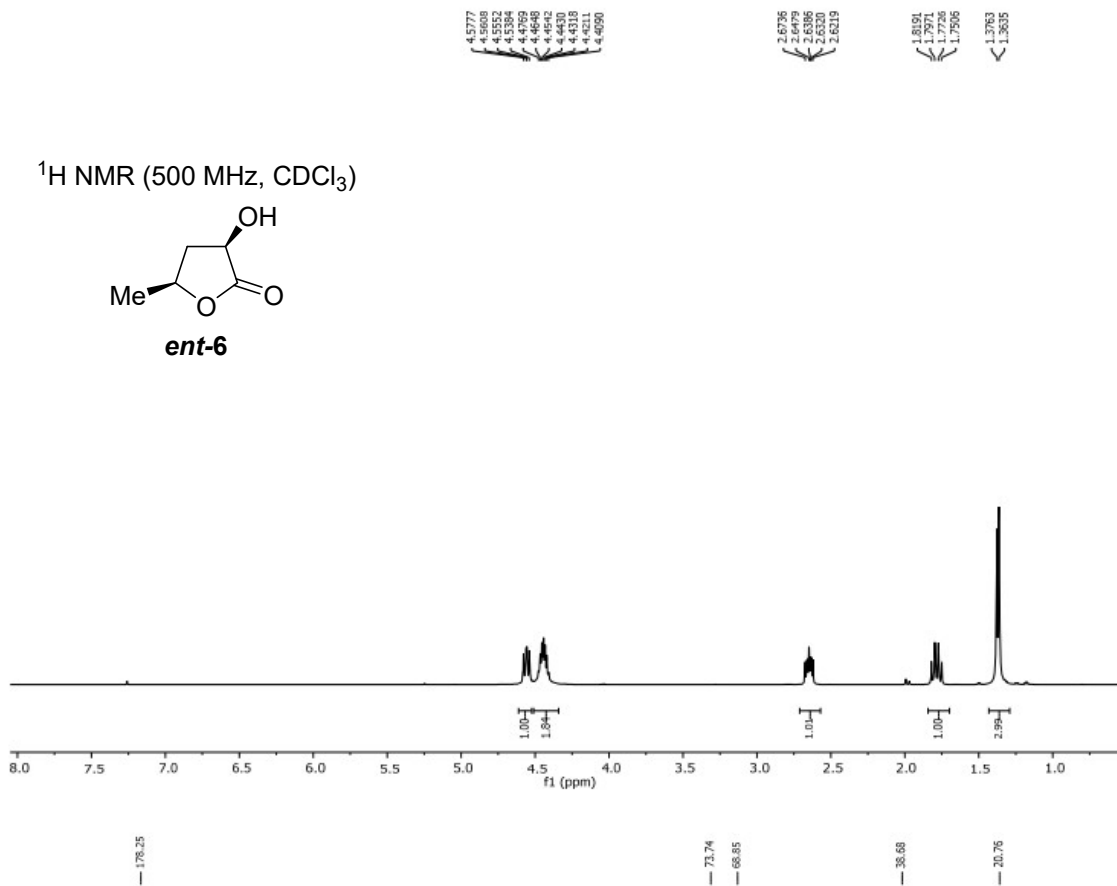

<sup>13</sup>C NMR (125 MHz, CDCl<sub>3</sub>)

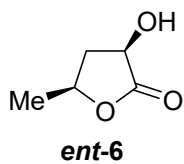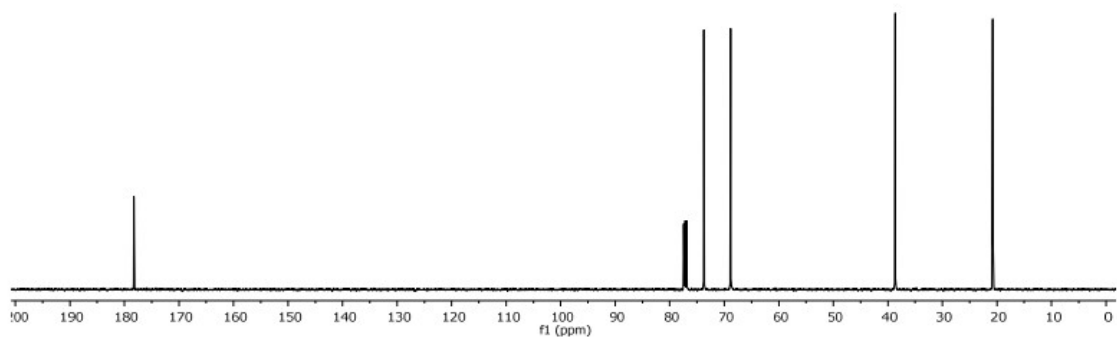



$^1\text{H}$  NMR (500 MHz,  $\text{CDCl}_3$ )

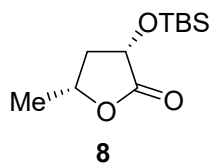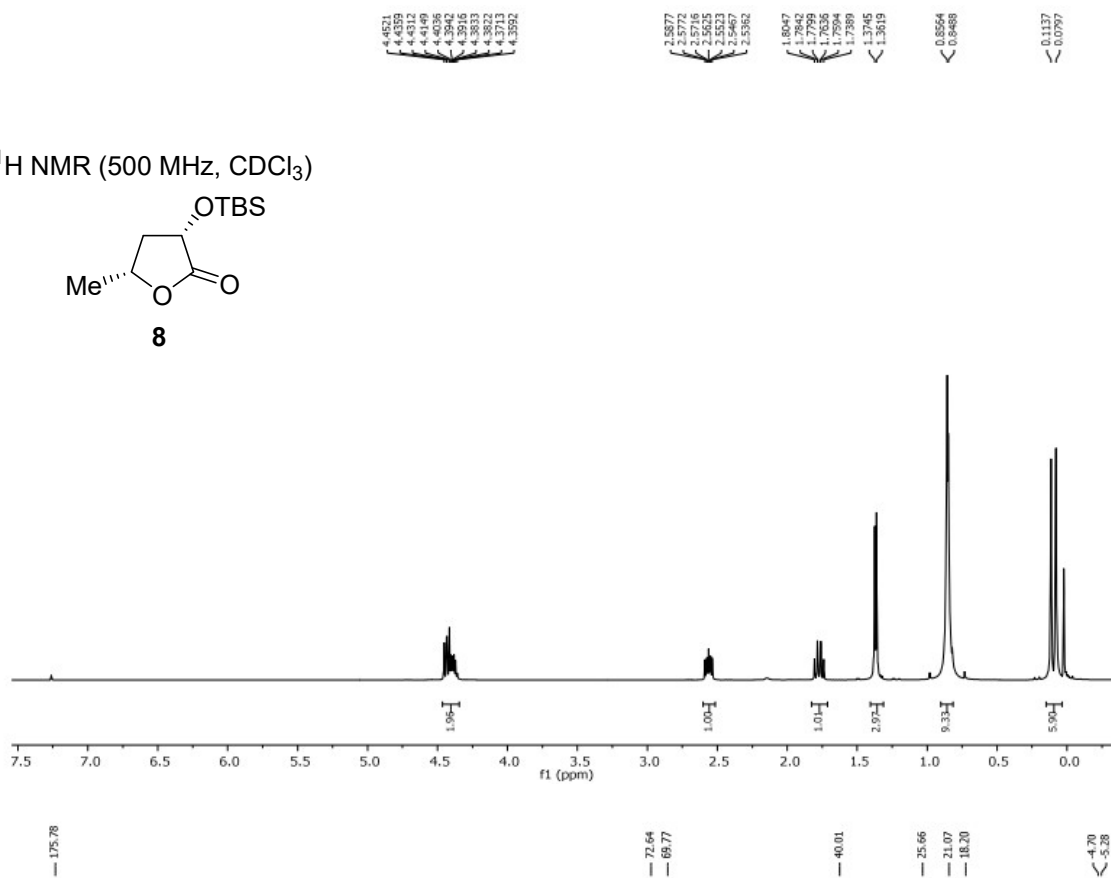

$^{13}\text{C}$  NMR (125 MHz,  $\text{CDCl}_3$ )

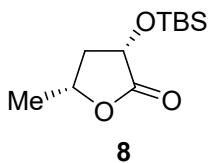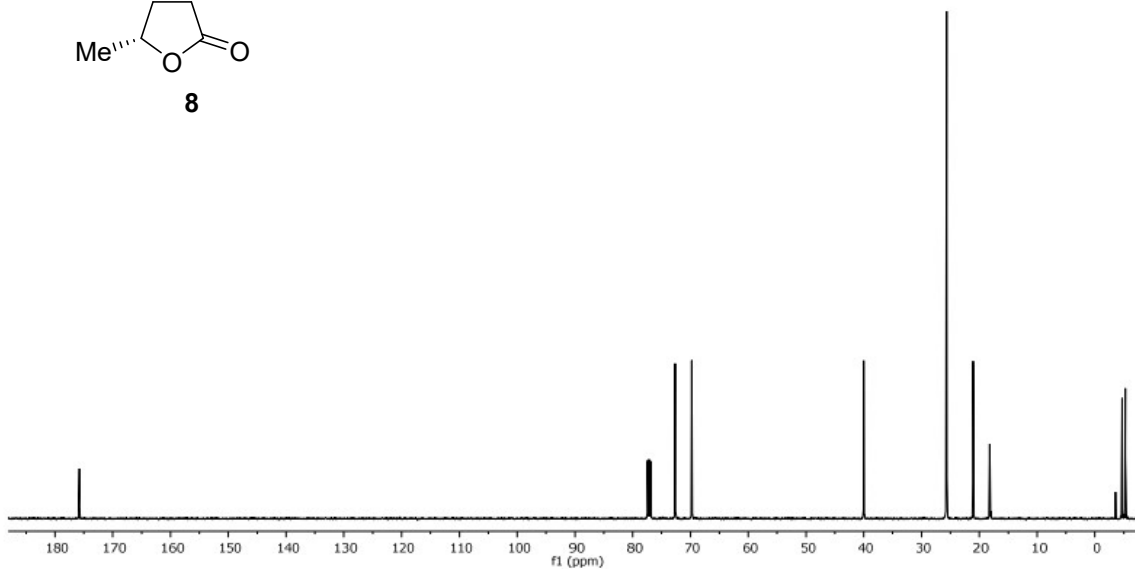

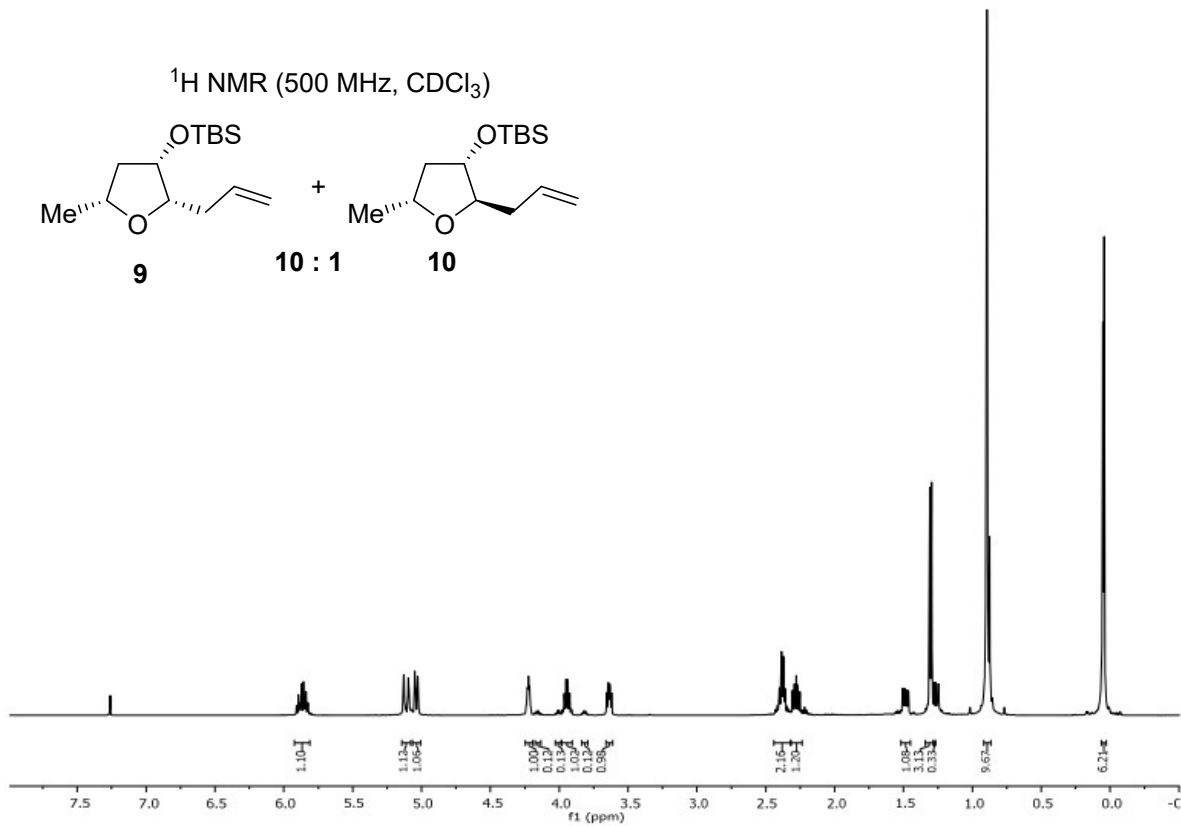

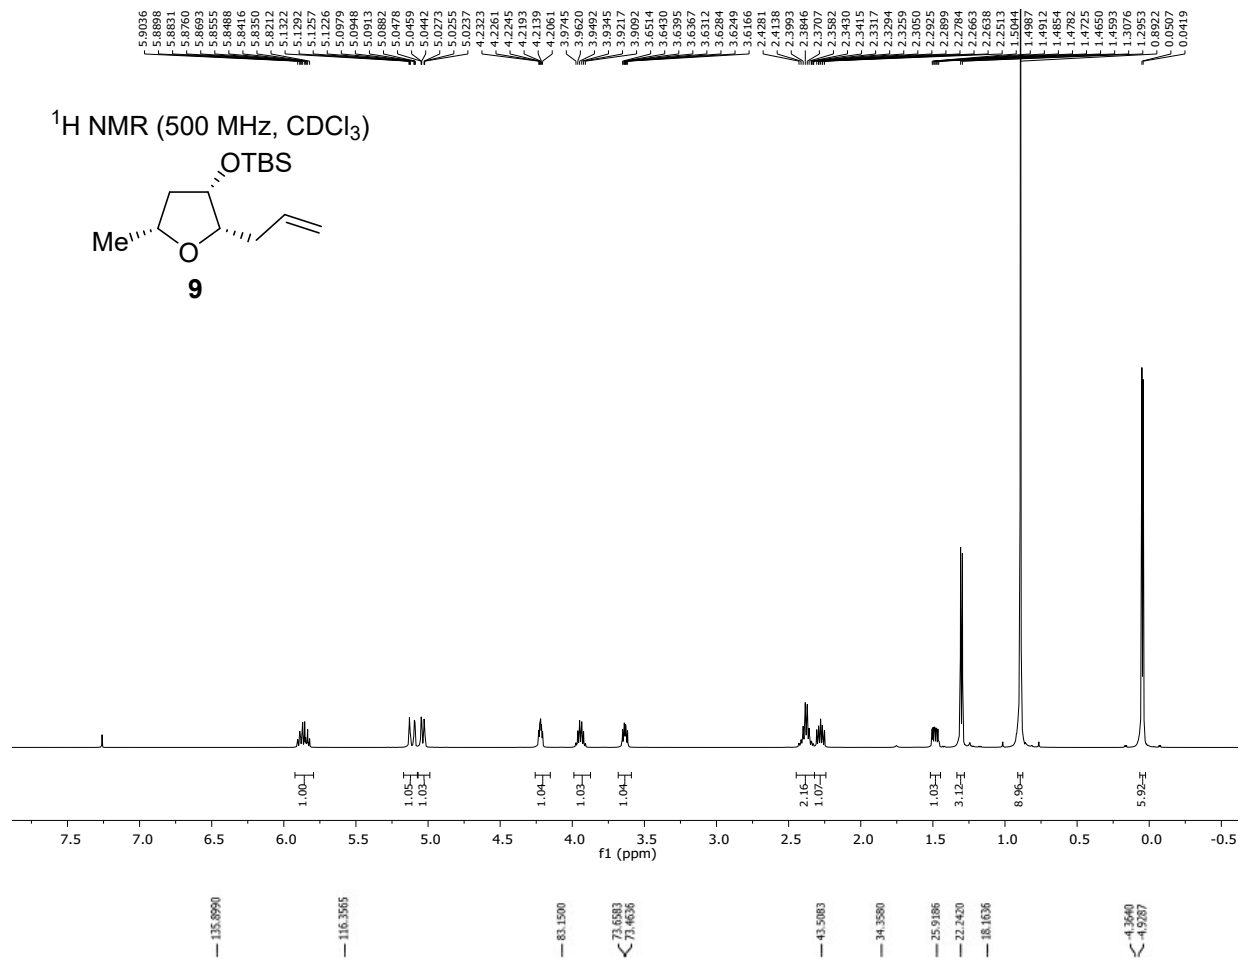

<sup>13</sup>C NMR (125 MHz, CDCl<sub>3</sub>)

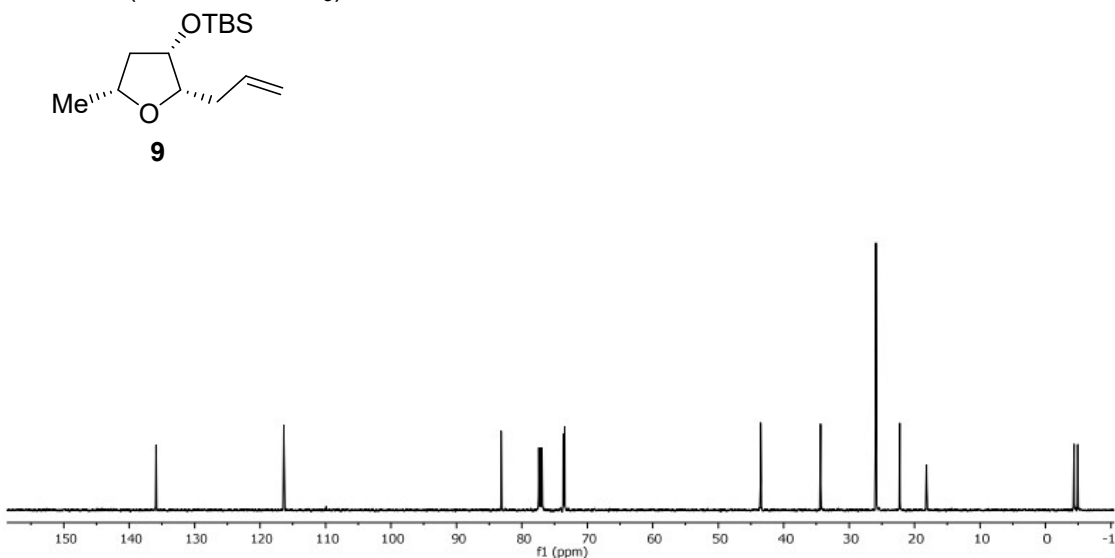

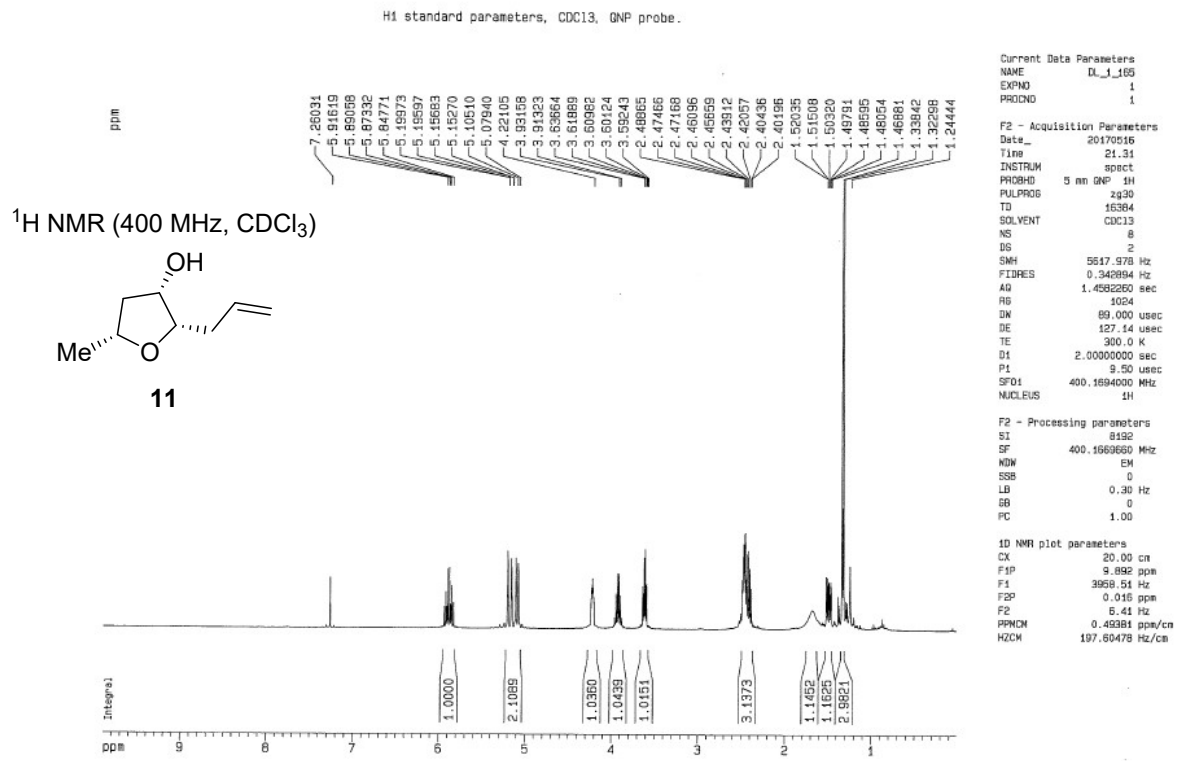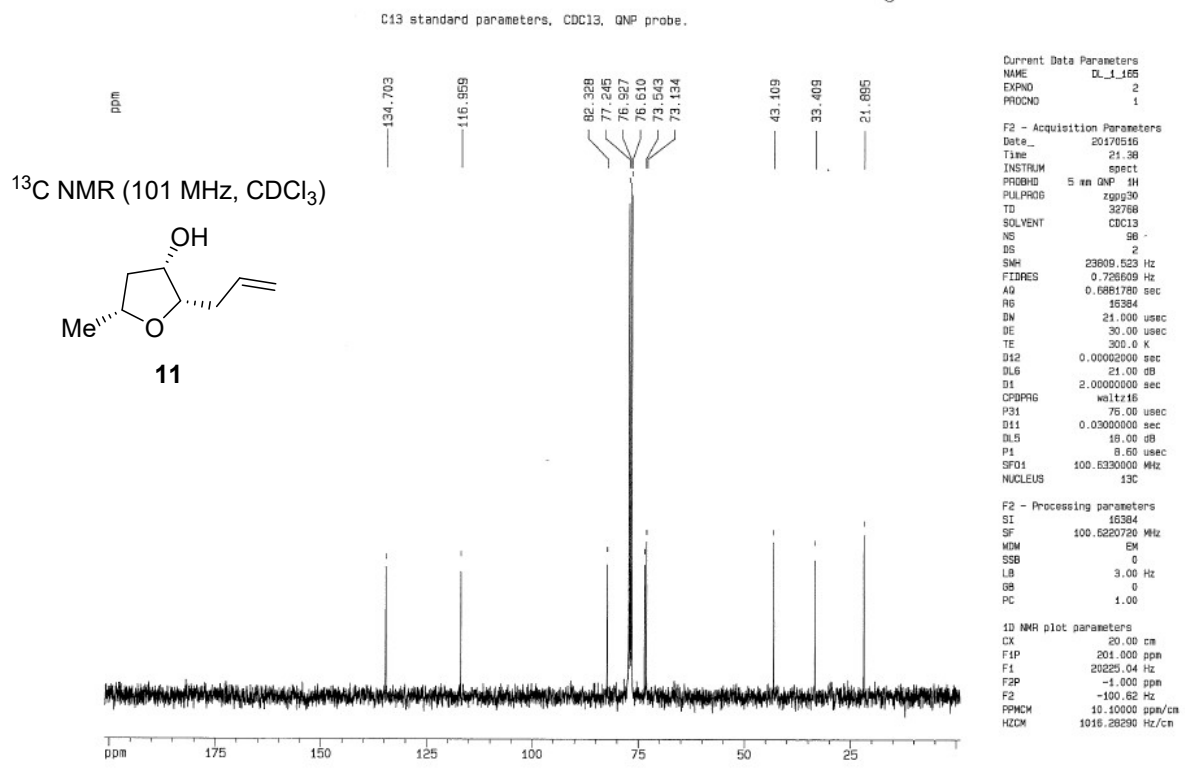

7.26  
5.90  
5.89  
5.88  
5.86  
5.84  
5.84  
5.83  
5.82  
5.79  
5.37  
5.16  
5.12  
5.12  
5.11  
5.09  
4.21  
4.20  
4.18  
4.17  
4.15  
4.14  
4.13  
4.13  
4.12  
4.11  
4.11  
4.11  
3.89  
3.88  
3.88  
3.86  
3.85  
2.42  
2.40  
2.38  
2.37  
2.36  
2.34  
2.33  
2.32  
2.32  
2.31  
2.31  
2.30  
2.30  
2.29  
2.29  
2.28  
2.28  
2.27  
2.26  
2.26  
2.24  
2.24  
2.21  
2.17  
1.71  
1.61  
1.59  
1.58  
1.56  
1.56  
1.54  
1.31  
1.30

<sup>1</sup>H NMR (400 MHz, CDCl<sub>3</sub>)

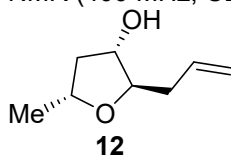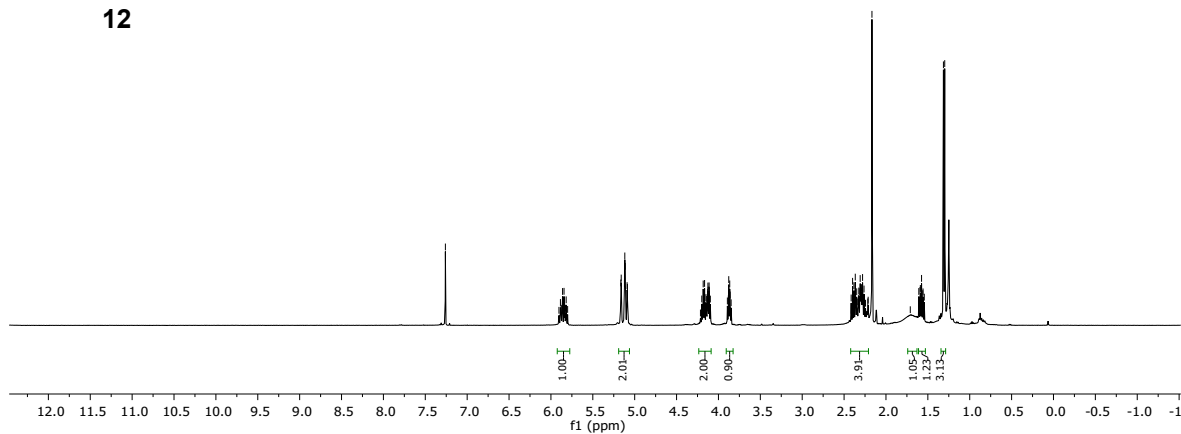

134.24  
117.38  
83.73  
77.23 CDCl<sub>3</sub>  
76.91 CDCl<sub>3</sub>  
76.60 CDCl<sub>3</sub>  
73.27  
42.10  
37.62  
22.05

<sup>13</sup>C NMR (101 MHz, CDCl<sub>3</sub>)

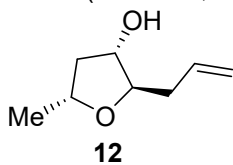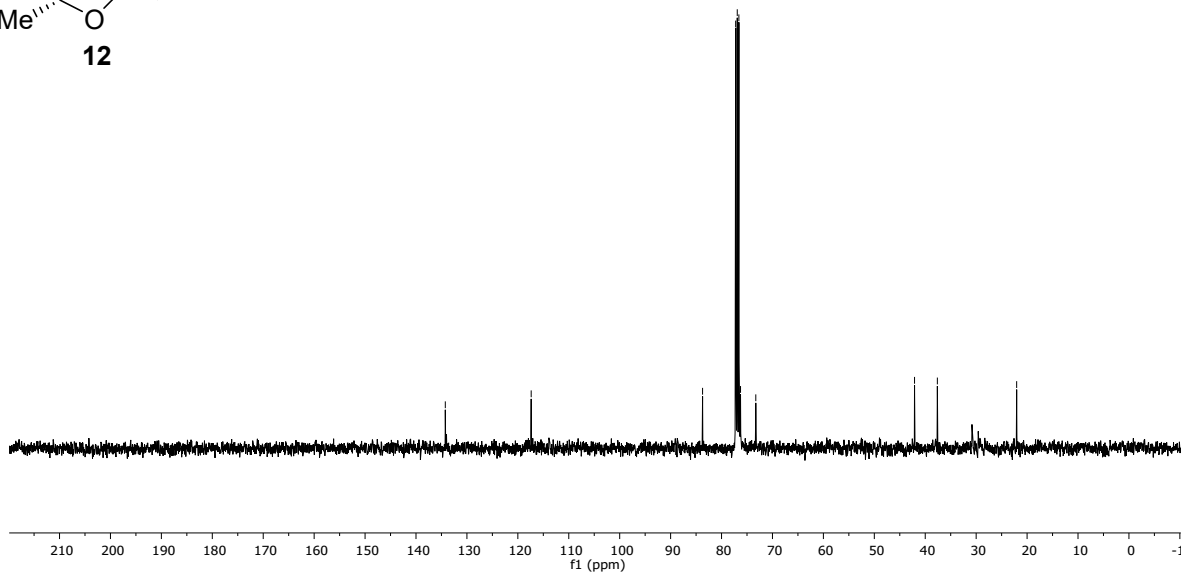

<sup>1</sup>H NMR (400 MHz, CDCl<sub>3</sub>)

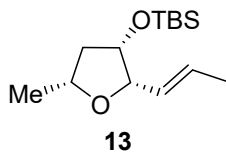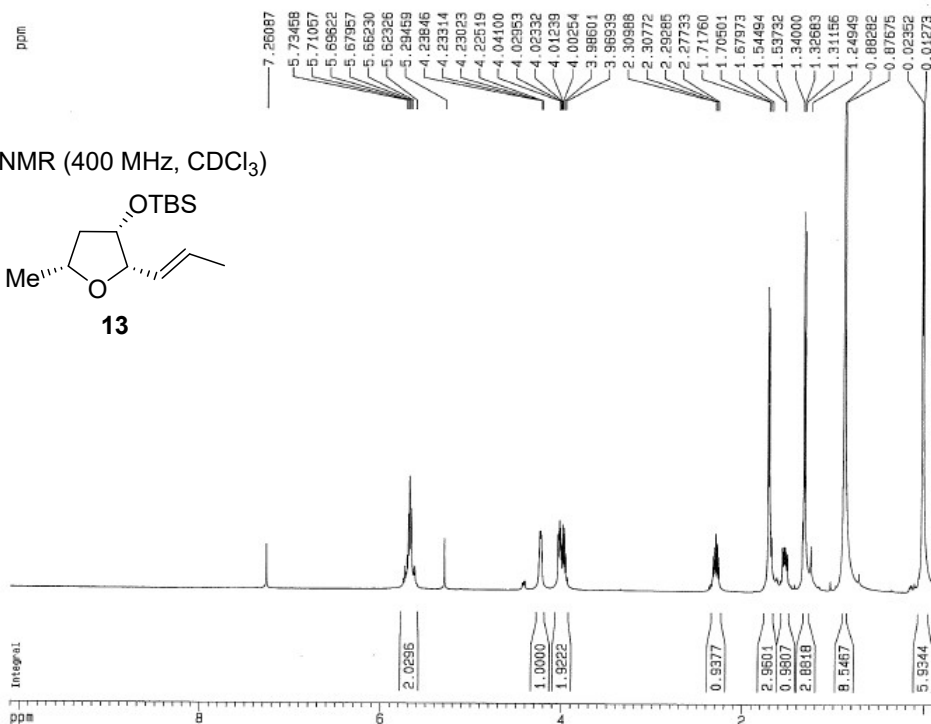

Current Data Parameters  
 NAME DL\_1\_151  
 EXPNO 1  
 PROCNO 1

F2 - Acquisition Parameters  
 Date\_ 20170417  
 Time 17.16  
 INSTRUM spect  
 PROBHD 5 mm QNP 1H  
 PULPROG zg30  
 TD 16384  
 SOLVENT CDCl3  
 NS 8  
 DS 2  
 SWH 5617.878 Hz  
 FIDRES 0.342894 Hz  
 AQ 1.4582260 sec  
 RG 715  
 DM 89.000 usec  
 DE 127.14 usec  
 TE 300.0 K  
 D1 2.0000000 sec  
 P1 9.50 usec  
 SFO1 400.1564000 MHz  
 NUCLEUS 1H

F2 - Processing parameters  
 SI 8192  
 SF 400.1569560 MHz  
 WDW EM  
 SSB 0  
 LB 0.30 Hz  
 GB 0  
 PC 1.00

1D NMR plot parameters  
 CX 20.00 cm  
 F1P 10.100 ppm  
 F1 4041.69 Hz  
 F2P -0.100 ppm  
 F2 -40.02 Hz  
 PPMCM 0.51000 ppm/cm  
 HZCM 204.08516 Hz/cm

<sup>13</sup>C NMR (101 MHz, CDCl<sub>3</sub>)

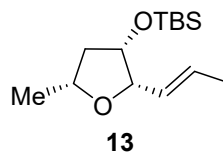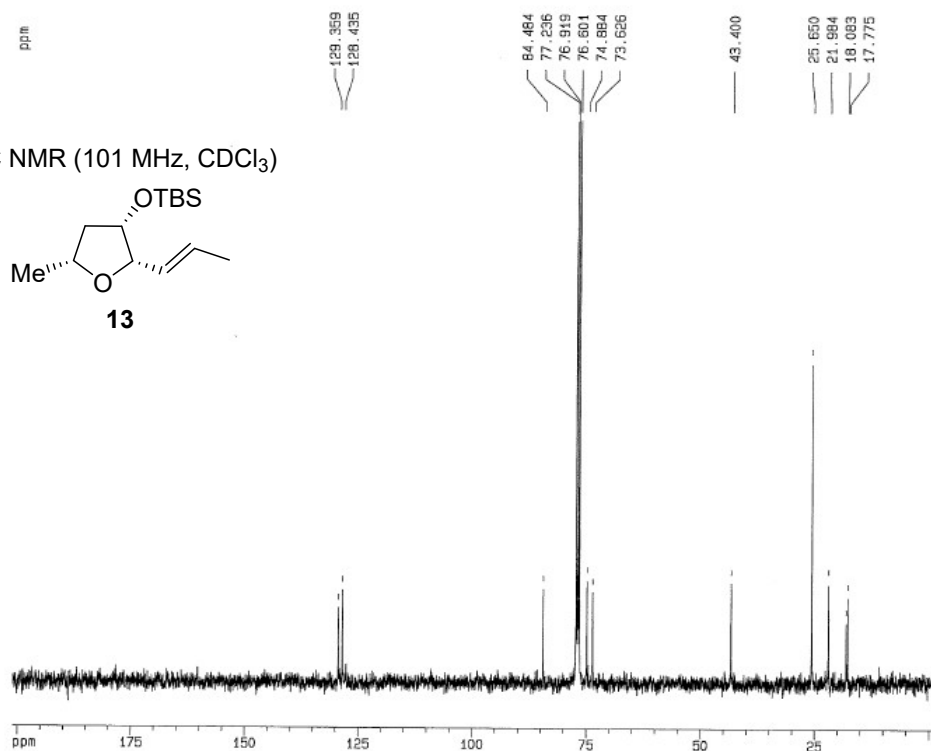

Current Data Parameters  
 NAME DL\_1\_151  
 EXPNO 2  
 PROCNO 1

F2 - Acquisition Parameters  
 Date\_ 20170417  
 Time 17.20  
 INSTRUM spect  
 PROBHD 5 mm QNP 1H  
 PULPROG zpgp30  
 TD 32768  
 SOLVENT CDCl3  
 NS 161  
 DS 2  
 SWH 23809.523 Hz  
 FIDRES 0.726609 Hz  
 AQ 0.6881780 sec  
 RG 16384  
 DM 21.000 usec  
 DE 30.00 usec  
 TE 300.0 K  
 D12 0.0002000 sec  
 DL5 21.00 dB  
 D1 2.0000000 sec  
 CPDPRG waltz16  
 P31 76.00 usec  
 D11 0.0300000 sec  
 DL5 18.00 dB  
 P1 8.60 usec  
 SFO1 100.6330000 MHz  
 NUCLEUS 13C

F2 - Processing parameters  
 SI 16384  
 SF 100.6220720 MHz  
 WDW EM  
 SSB 0  
 LB 3.00 Hz  
 GB 0  
 PC 1.00

1D NMR plot parameters  
 CX 20.00 cm  
 F1P 201.000 ppm  
 F1 20225.04 Hz  
 F2P -1.000 ppm  
 F2 -100.62 Hz  
 PPMCM 10.10000 ppm/cm  
 HZCM 1016.26290 Hz/cm

H1 standard parameters, CDC13, QNP probe.

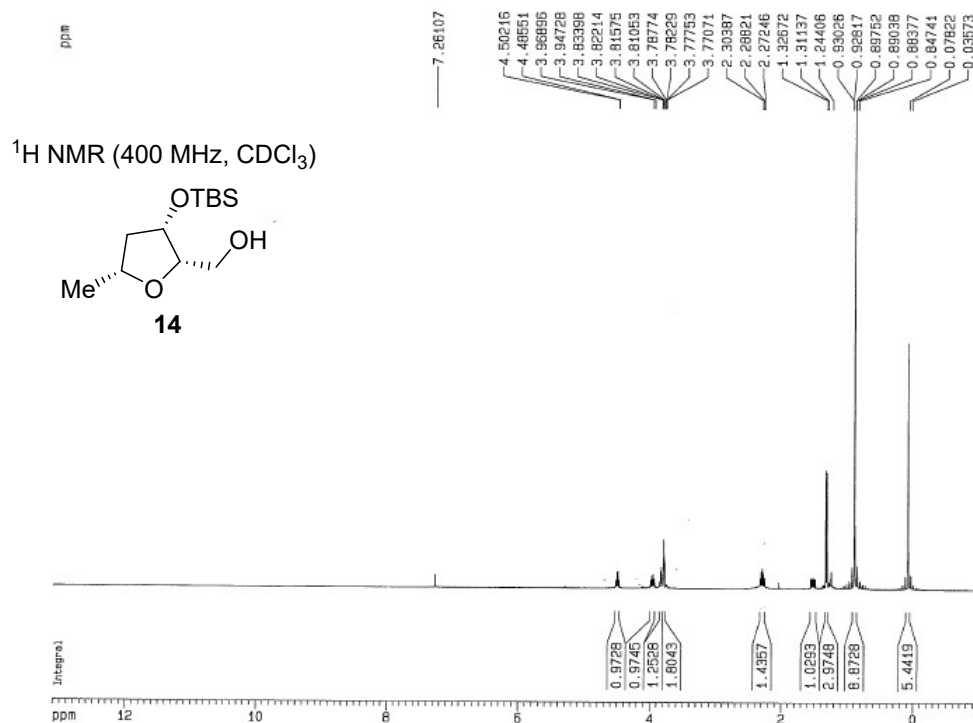

Current Data Parameters  
 NAME DL\_1\_166  
 EXPNO 1  
 PROCNO 1

F2 - Acquisition Parameters  
 Date\_ 20170518  
 Time 11.38  
 INSTRUM spect  
 PROBHD 5 mm QNP 1H  
 PULPROG zg30  
 TD 16384  
 SOLVENT CDC13  
 NS 8  
 DS 2  
 SWH 5617.978 Hz  
 FIDRES 0.342894 Hz  
 AQ 1.4582260 sec  
 RG 745  
 DM 89.000 usec  
 DE 127.14 usec  
 TE 300.0 K  
 D1 2.00000000 sec  
 P1 9.50 usec  
 SFO1 400.1694000 MHz  
 NUCLEUS 1H

F2 - Processing parameters  
 SI 8192  
 SF 400.1669560 MHz  
 WDN EM  
 SSB 0  
 LB 0.30 Hz  
 GB 0  
 PC 1.00

1D NMR plot parameters  
 CX 20.00 cm  
 F1P 13.102 ppm  
 F1 5242.96 Hz  
 F2P -0.937 ppm  
 F2 -374.53 Hz  
 PPMCM 0.78165 ppm/cm  
 HZCM 280.85865 Hz/cm

C13 standard parameters, CDC13, QNP probe.

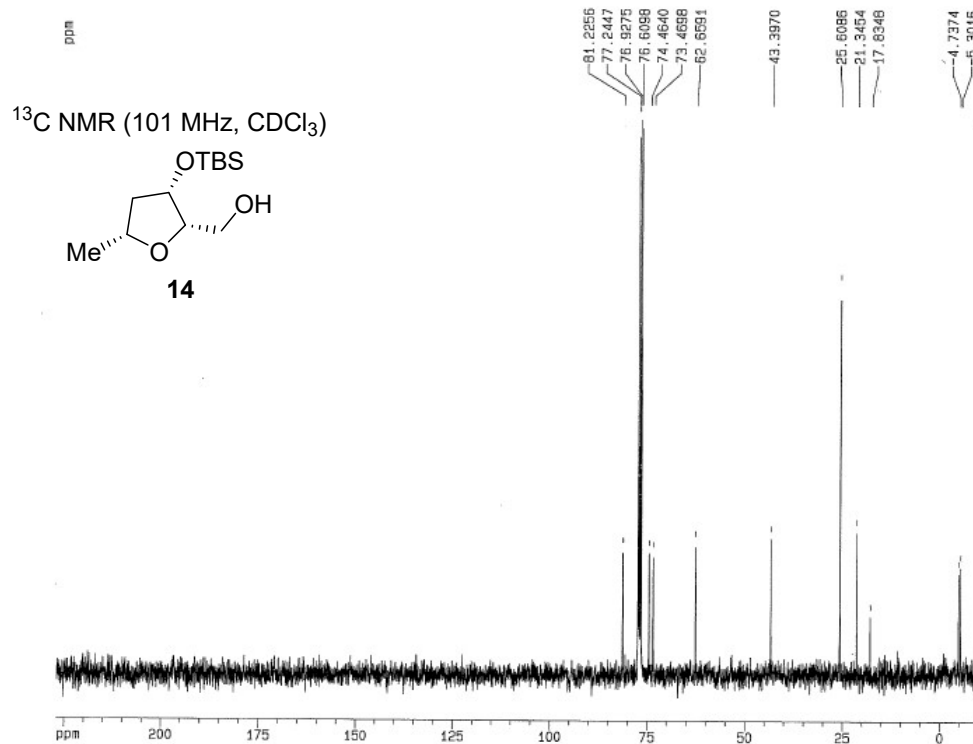

Current Data Parameters  
 NAME DL\_1\_166  
 EXPNO 2  
 PROCNO 1

F2 - Acquisition Parameters  
 Date\_ 20170518  
 Time 11.45  
 INSTRUM spect  
 PROBHD 5 mm QNP 1H  
 PULPROG zgpg30  
 TD 32768  
 SOLVENT CDC13  
 NS 101  
 DS 2  
 SWH 23809.523 Hz  
 FIDRES 0.728609 Hz  
 AQ 0.6881780 sec  
 RG 15384  
 DM 21.000 usec  
 DE 30.00 usec  
 TE 300.0 K  
 D12 0.0002000 sec  
 DL5 21.00 dB  
 D1 2.00000000 sec  
 CPDPRG waltz16  
 P31 76.00 usec  
 D11 0.03000000 sec  
 DL5 18.00 dB  
 P1 8.60 usec  
 SFO1 100.6330000 MHz  
 NUCLEUS 13C

F2 - Processing parameters  
 SI 15384  
 SF 100.6226720 MHz  
 WDN EM  
 SSB 0  
 LB 3.00 Hz  
 GB 0  
 PC 1.00

1D NMR plot parameters  
 CX 20.00 cm  
 F1P 226.916 ppm  
 F1 22832.76 Hz  
 F2P -9.707 ppm  
 F2 -976.77 Hz  
 PPMCM 11.83115 ppm/cm  
 HZCM 1190.47520 Hz/cm

H1 standard parameters, CDC13, GNP probe.

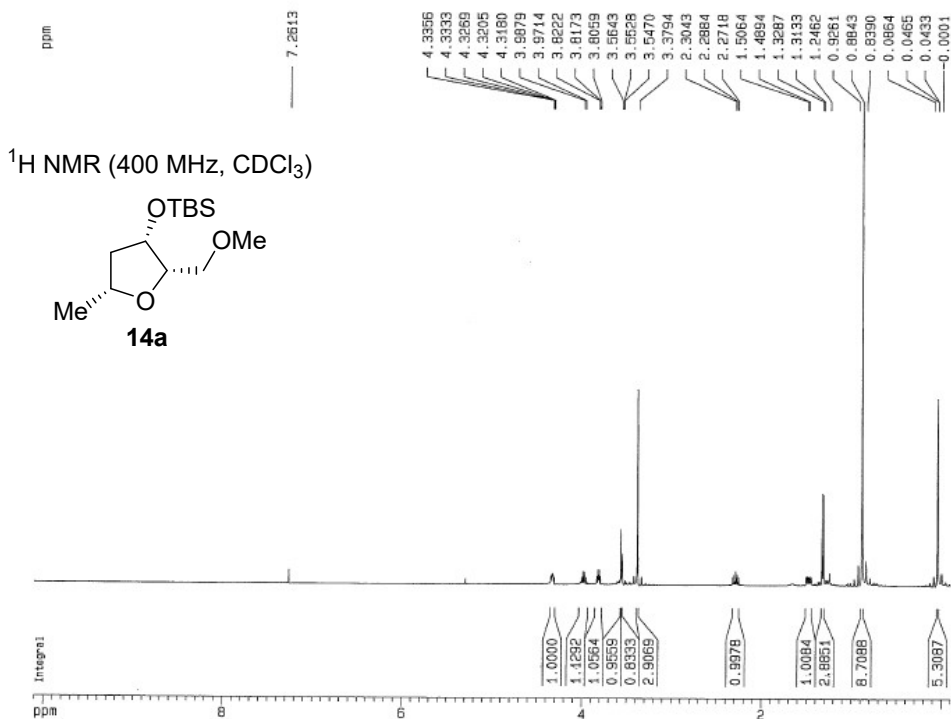

Current Data Parameters  
NAME DL-1-168-M  
EXPNO 1  
PROCNO 1

F2 - Acquisition Parameters  
Date\_ 20170518  
Time 22.26  
INSTRUM spect  
PROBHD 5 mm GNP 1H  
PULPROG zg30  
TD 16384  
SOLVENT CDC13  
NS 8  
DS 2  
SWH 5617.978 Hz  
FIDRES 0.342884 Hz  
AQ 1.4582260 sec  
RG 715  
DW 89.000 usec  
DE 127.14 usec  
TE 300.0 K  
D1 2.00000000 sec  
P1 9.50 usec  
SFO1 400.1694000 MHz  
NUCLEUS 1H

F2 - Processing parameters  
SI 512  
SF 400.1699560 MHz  
WDW EM  
SSB 0  
LB 0.30 Hz  
GB 0  
PC 1.00

1D NMR plot parameters  
CX 20.00 cm  
FAP 10.100 ppm  
F1 4041.69 Hz  
F2P -0.100 ppm  
F2 -40.02 Hz  
PPMCM 0.51000 ppm/cm  
HZCM 204.08516 Hz/cm

C13 standard parameters, CDC13, GNP probe.

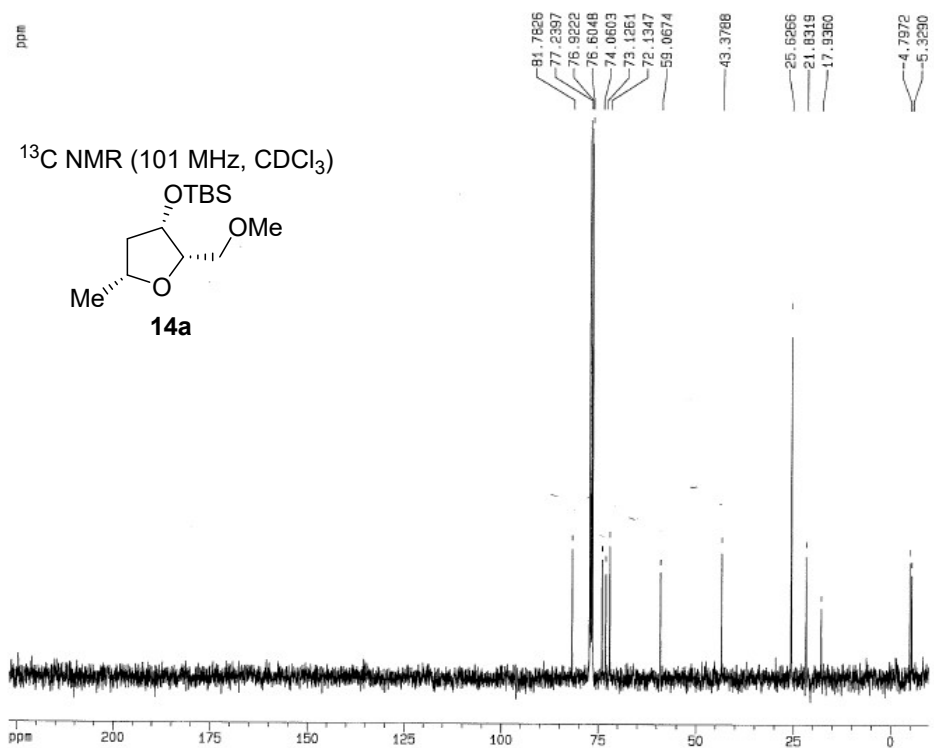

Current Data Parameters  
NAME DL-1-168-M  
EXPNO 2  
PROCNO 1

F2 - Acquisition Parameters  
Date\_ 20170518  
Time 22.32  
INSTRUM spect  
PROBHD 5 mm GNP 1H  
PULPROG zgpg30  
TD 32788  
SOLVENT CDC13  
NS 101  
DS 2  
SWH 23809.523 Hz  
FIDRES 0.728609 Hz  
AQ 0.6881780 sec  
RG 16384  
DW 21.000 usec  
DE 30.00 usec  
TE 300.0 K  
D12 0.00002000 sec  
DL6 21.00 dB  
D1 2.00000000 sec  
CPDPRG waltz16  
P31 76.00 usec  
D11 0.03000000 sec  
DL5 18.00 dB  
P1 8.60 usec  
SFO1 100.6330000 MHz  
NUCLEUS 13C

F2 - Processing parameters  
SI 16384  
SF 100.6220720 MHz  
WDW EM  
SSB 0  
LB 3.00 Hz  
GB 0  
PC 1.00

1D NMR plot parameters  
CX 20.00 cm  
FAP 226.916 ppm  
F1 22832.75 Hz  
F2P -9.707 ppm  
F2 -976.77 Hz  
PPMCM 11.83116 ppm/cm  
HZCM 1190.47620 Hz/cm



H1 standard parameters, CDC13, QNP probe.

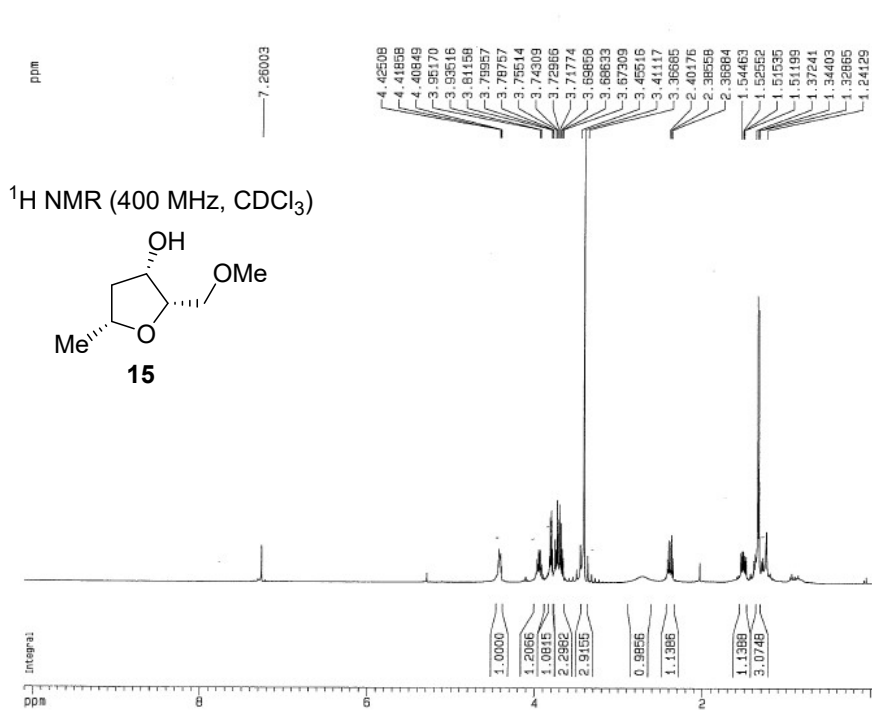

Current Data Parameters  
NAME DL-1-159  
EXPNO 1  
PROCNO 1

F2 - Acquisition Parameters  
Date\_ 20170522  
Time 21.09  
INSTRUM spect  
PROBHD 5 mm QNP 1H  
PULPROG zg30  
TD 16384  
SOLVENT CDC13  
NS 8  
DS 2  
SWH 5617.978 Hz  
FIDRES 0.342894 Hz  
AQ 1.4582850 sec  
RG 1024  
DW 89.000 usec  
DE 127.14 usec  
TE 300.0 K  
D1 2.00000000 sec  
F1 9.50 usec  
SFO1 400.1564000 MHz  
NUCLEUS 1H

F2 - Processing parameters  
SI 8192  
SF 400.1565660 MHz  
WDW EM  
SSB 0  
LB 0.30 Hz  
GB 0  
PC 1.00

1D NMR plot parameters  
CX 20.00 cm  
F1P 10.100 ppm  
F1 4041.69 Hz  
F2P -0.100 ppm  
F2 -40.02 Hz  
PPMCM 0.51600 ppm/cm  
HZCM 204.08916 Hz/cm

C13 standard parameters, CDC13, QNP probe.

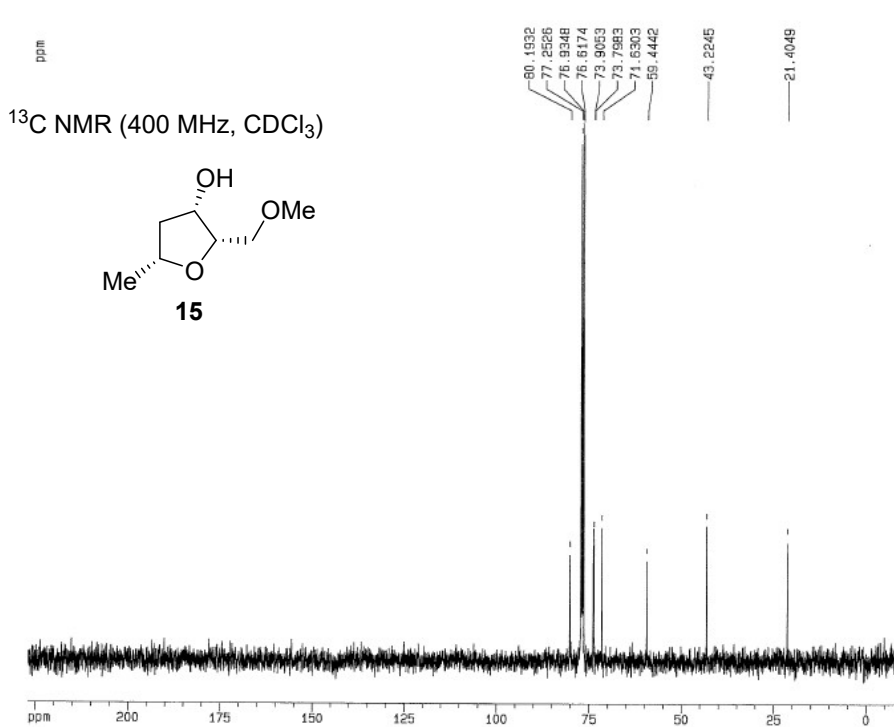

Current Data Parameters  
NAME DL-1-159  
EXPNO 2  
PROCNO 1

F2 - Acquisition Parameters  
Date\_ 20170522  
Time 21.13  
INSTRUM spect  
PROBHD 5 mm QNP 1H  
PULPROG zgpg30  
TD 32768  
SOLVENT CDC13  
NS 77  
DS 2  
SWH 23809.523 Hz  
FIDRES 0.726509 Hz  
AQ 0.8881780 sec  
RG 16384  
DW 21.000 usec  
DE 30.00 usec  
TE 300.0 K  
D12 0.00002000 sec  
DL6 21.00 dB  
D1 2.00000000 sec  
SFO1 100.6220720 MHz  
NUCLEUS 13C

F2 - Processing parameters  
SI 16384  
SF 100.6220720 MHz  
WDW EM  
SSB 0  
LB 3.00 Hz  
GB 0  
PC 1.00

1D NMR plot parameters  
CX 20.00 cm  
F1P 226.916 ppm  
F1 22832.76 Hz  
F2P -9.707 ppm  
F2 -976.77 Hz  
PPMCM 11.83115 ppm/cm  
HZCM 1190.47620 Hz/cm

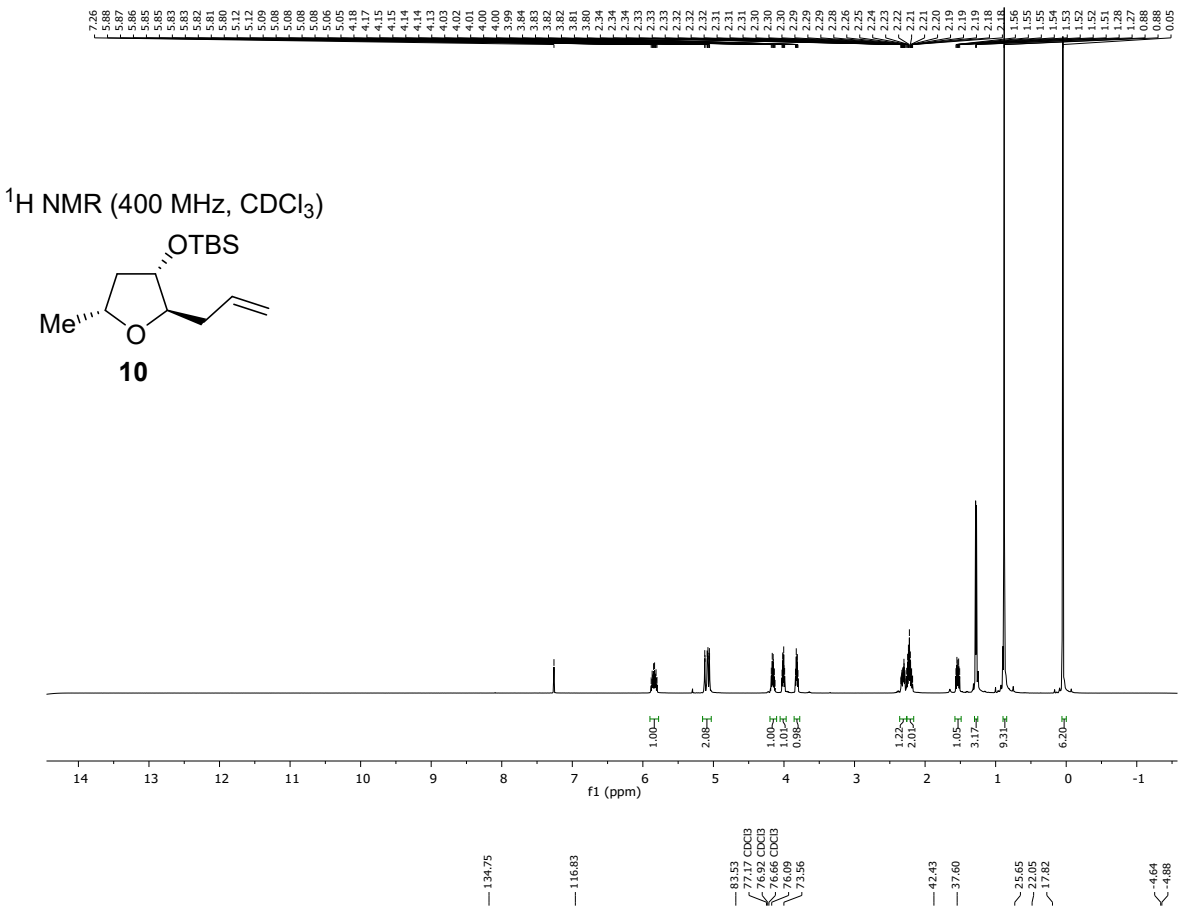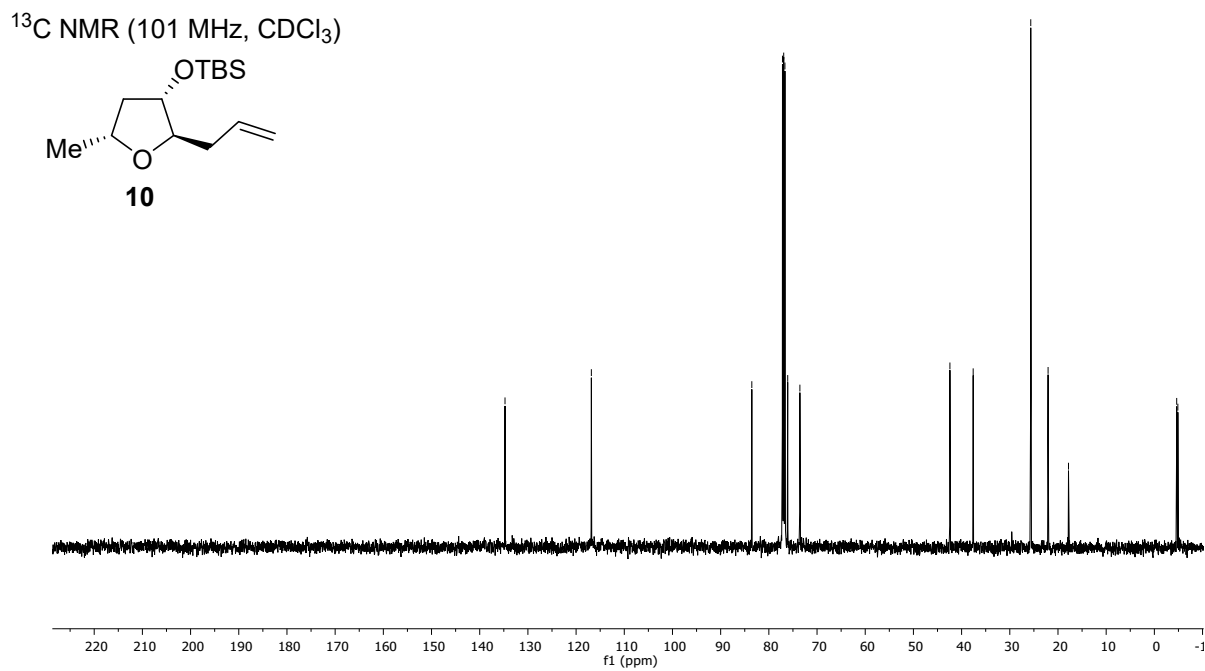

H1 standard parameters, CDC13, GNP probe.

<sup>1</sup>H NMR (400 MHz, CDCl<sub>3</sub>)

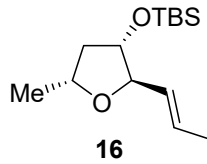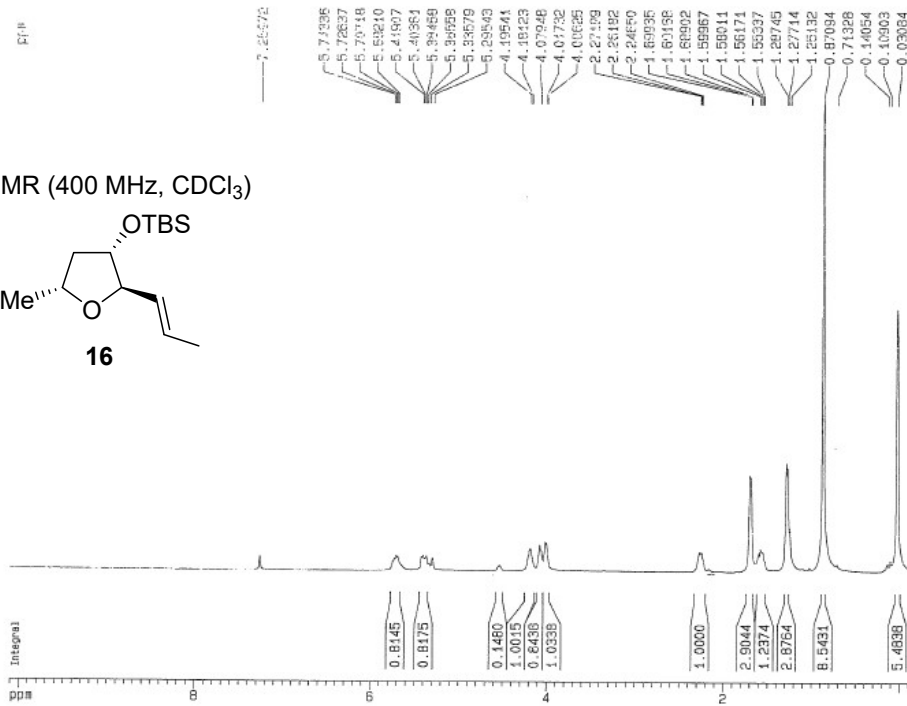

Current Data Parameters  
 NAME DL\_128\_c  
 EXPNO 1  
 PROCNO 1

F2 - Acquisition Parameters  
 Date\_ 20170308  
 Time 15:34  
 INSTRUM spect  
 PROBHD 5 mm GNP 5H  
 PULPROG zg30  
 TD 16384  
 SOLVENT CDC13  
 NS 8  
 DS 2  
 SWH 5617.978 Hz  
 FIDRES 0.342894 Hz  
 AQ 1.4562260 sec  
 RG 715  
 DW 89.000 usec  
 DE 127.14 usec  
 TE 300.0 K  
 D1 2.0000000 sec  
 P1 9.50 usec  
 SFO1 400.1694000 MHz  
 NUCLEUS 1H

F2 - Processing parameters  
 SI 8192  
 SF 400.1696660 MHz  
 WDW EM  
 SSB 0  
 LB 0.30 Hz  
 GB 0  
 PC 1.00

1D NMR plot parameters  
 CX 20.00 cm  
 F1P 10.100 ppm  
 F1 4041.69 Hz  
 F2P -0.100 ppm  
 F2 -40.02 Hz  
 PPMCM 0.51000 ppm/cm  
 HZCM 204.08516 Hz/cm

C13 standard parameters, CDC13, GNP probe.

<sup>13</sup>C NMR (101 MHz, CDCl<sub>3</sub>)

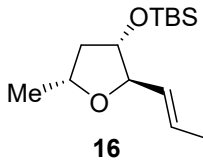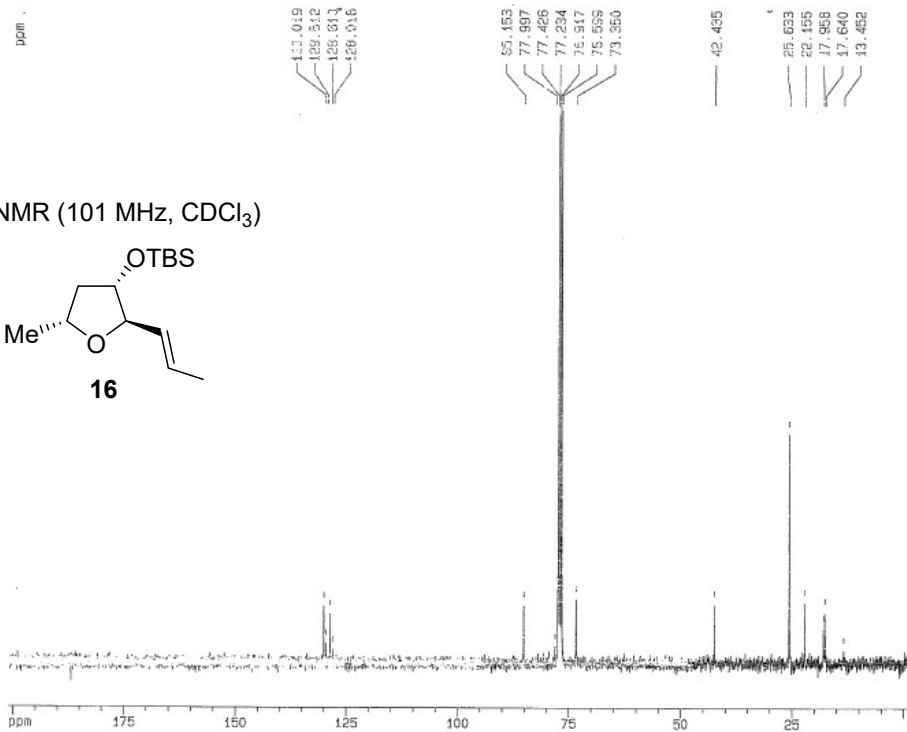

Current Data Parameters  
 NAME DL\_128\_c  
 EXPNO 2  
 PROCNO 1

F2 - Acquisition Parameters  
 Date\_ 20170308  
 Time 15:35  
 INSTRUM spect  
 PROBHD 5 mm GNP 1H  
 PULPROG zgpg30  
 TD 32768  
 SOLVENT CDC13  
 NS 269  
 DS 2  
 SWH 23809.523 Hz  
 FIDRES 0.726909 Hz  
 AQ 0.6881780 sec  
 RG 16384  
 DW 21.000 usec  
 DE 30.00 usec  
 TE 300.0 K  
 D12 0.0002000 sec  
 DL5 21.00 dB  
 D1 2.0000000 sec  
 CPDPRG waltz16  
 P31 75.00 usec  
 D11 0.0300000 sec  
 DL5 18.00 dB  
 P1 8.60 usec  
 SFO1 100.6330000 MHz  
 NUCLEUS 13C

F2 - Processing parameters  
 SI 16384  
 SF 100.6220720 MHz  
 WDW EM  
 SSB 0  
 LB 3.00 Hz  
 GB 0  
 PC 1.00

1D NMR plot parameters  
 CX 20.00 cm  
 F1P 201.000 ppm  
 F1 20225.04 Hz  
 F2P -1.000 ppm  
 F2 -100.62 Hz  
 PPMCM 10.10000 ppm/cm  
 HZCM 1016.28290 Hz/cm

H1 standard parameters, CDC13, QNP probe.

<sup>13</sup>C NMR (101 MHz, CDCl<sub>3</sub>)

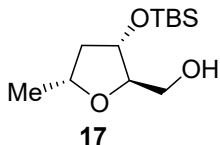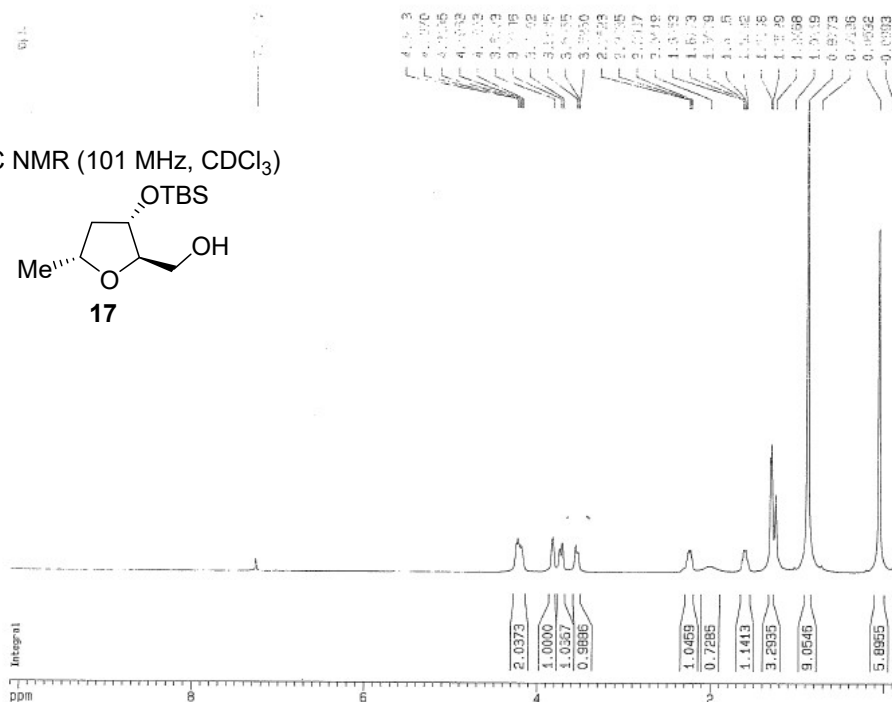

Current Data Parameters  
 NAME DL\_1\_130  
 EXPNO 1  
 PROCNO 1  
 F2 - Acquisition Parameters  
 Date\_ 20170313  
 Time 15.37  
 INSTRUM spect  
 PROBRD 5 mm QNP 2H  
 PULPROG zg30  
 TD 16384  
 SOLVENT CDCl3  
 NS 34  
 DS 2  
 SMH 5617.978 Hz  
 FIDRES 0.342894 Hz  
 AQ 1.4582260 sec  
 RG 715  
 DM 89.000 usec  
 DE 127.14 usec  
 TE 300.0 K  
 D1 2.00000000 sec  
 P1 9.50 usec  
 SFO1 400.1694000 MHz  
 NUCLEUS 1H

F2 - Processing parameters  
 SI 6192  
 SF 400.1668660 MHz  
 WDW EM  
 SSB 0  
 LB 0.30 Hz  
 GB 0  
 PC 1.00

1D NMR plot parameters  
 CX 20.00 cm  
 F1P 10.100 ppm  
 F1 4041.69 Hz  
 F2P -0.100 ppm  
 F2 -40.02 Hz  
 PPMCM 0.51000 ppm/cm  
 HZCM 204.08616 Hz/cm

C13 standard parameters, CDC13, QNP probe.

<sup>13</sup>C NMR (100 MHz, CDCl<sub>3</sub>)

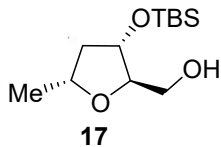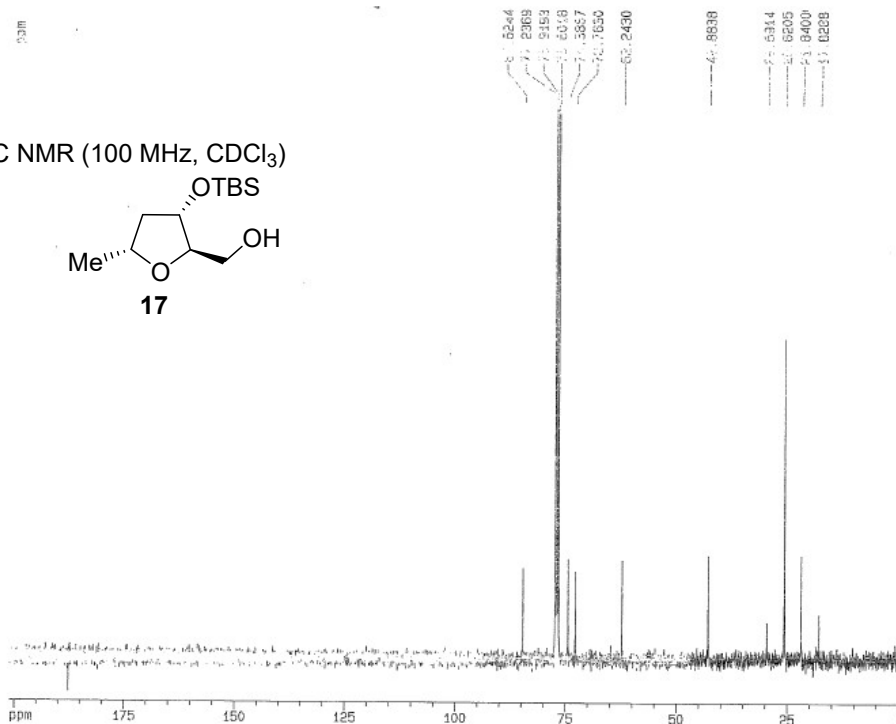

Current Data Parameters  
 NAME DL\_1\_130  
 EXPNO 2  
 PROCNO 1

F2 - Acquisition Parameters  
 Date\_ 20170313  
 Time 13.32  
 INSTRUM spect  
 PROBRD 5 mm QNP 1H  
 PULPROG zgpg30  
 TD 32768  
 SOLVENT CDCl3  
 NS 177  
 DS 2  
 SMH 29809.523 Hz  
 FIDRES 0.726609 Hz  
 AQ 0.6801780 sec  
 RG 16364  
 DM 21.000 usec  
 DE 30.00 usec  
 TE 300.0 K  
 D12 0.00002000 sec  
 DL6 21.00 dB  
 D1 2.00000000 sec  
 DPORR meltz16  
 P31 76.00 usec  
 D11 0.03000000 sec  
 DL5 18.00 dB  
 P1 3.60 usec  
 SFO1 100.6330000 MHz  
 NUCLEUS 13C

F2 - Processing parameters  
 SI 16364  
 SF 100.6220720 MHz  
 WDW EM  
 SSB 0  
 LB 3.00 Hz  
 GB 0  
 PC 1.00

1D NMR plot parameters  
 CX 20.00 cm  
 F1P 201.000 ppm  
 F1 20225.04 Hz  
 F2P -1.000 ppm  
 F2 -100.62 Hz  
 PPMCM 10.10000 ppm/cm  
 HZCM 1016.28290 Hz/cm

H1 standard parameters, CDC13, QNP probe.

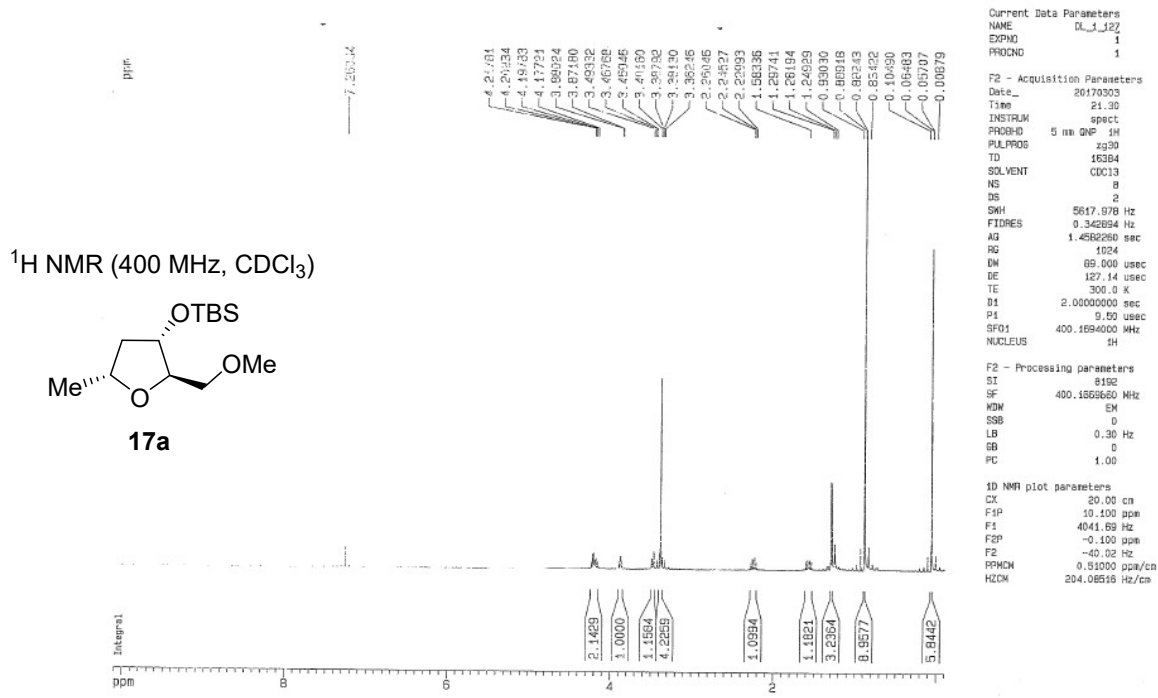

C13 standard parameters, CDC13, QNP probe.

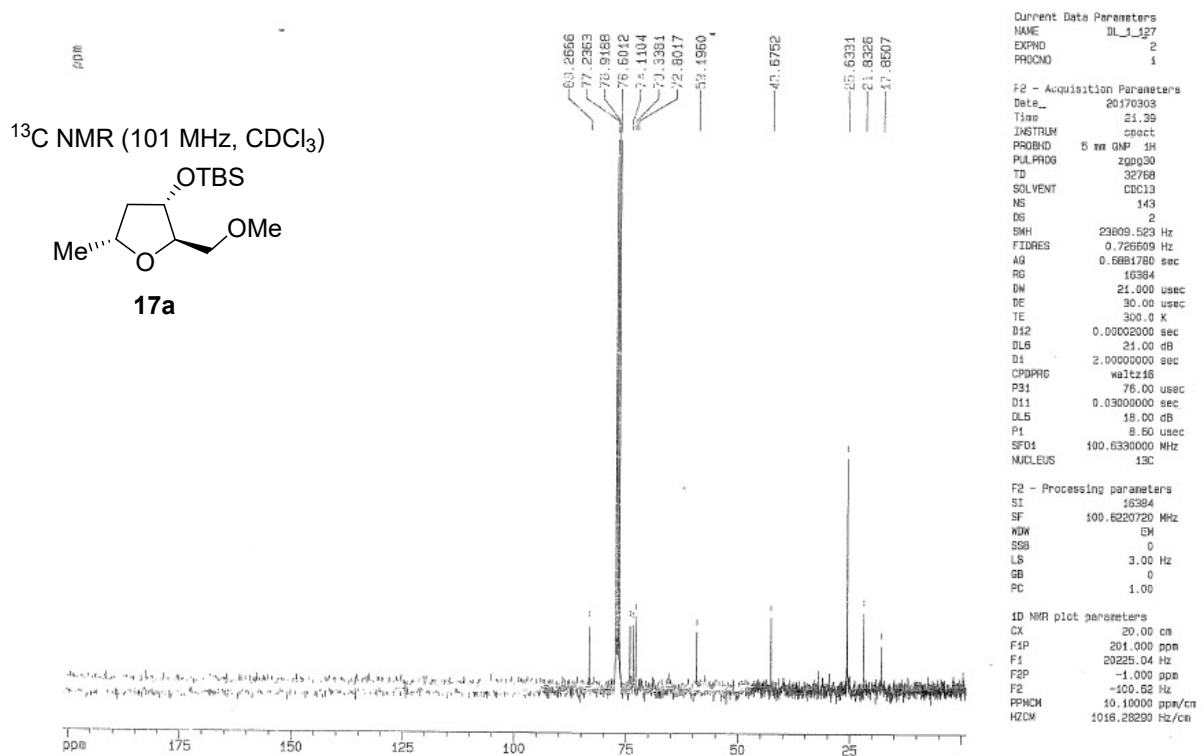

H1 standard parameters, CDC13, QNP probe.

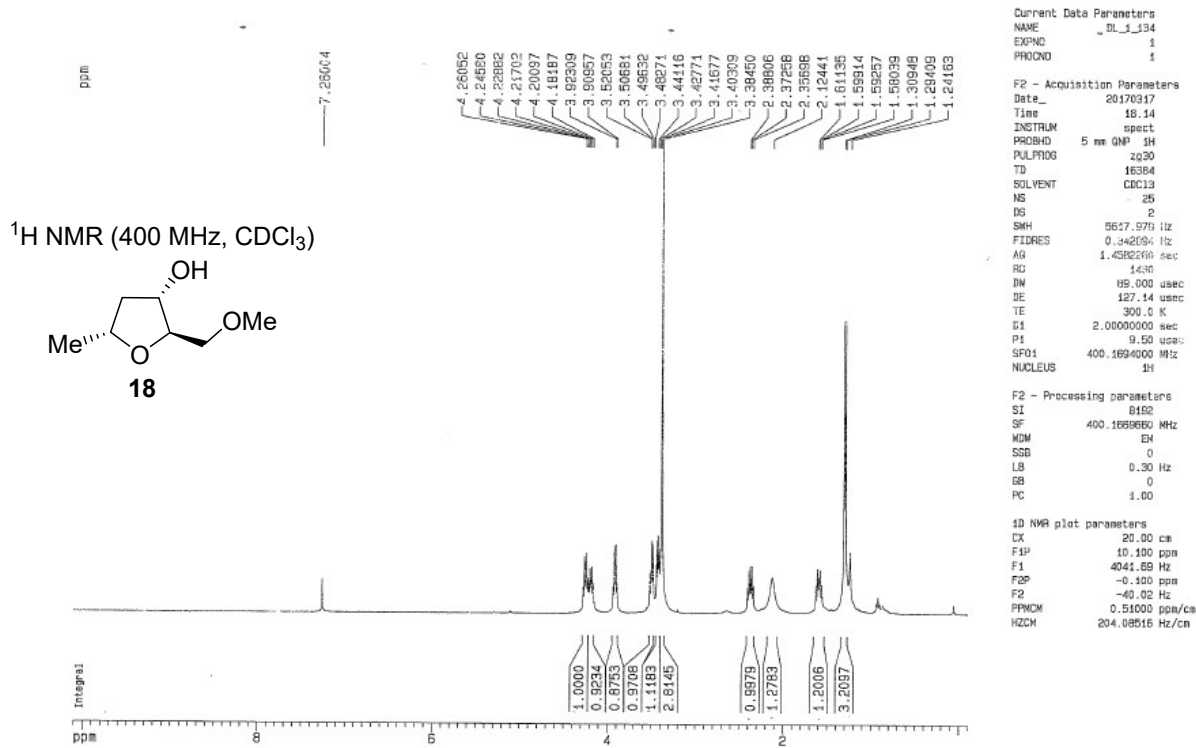

<sup>13</sup>C NMR (101 MHz, CDCl<sub>3</sub>)

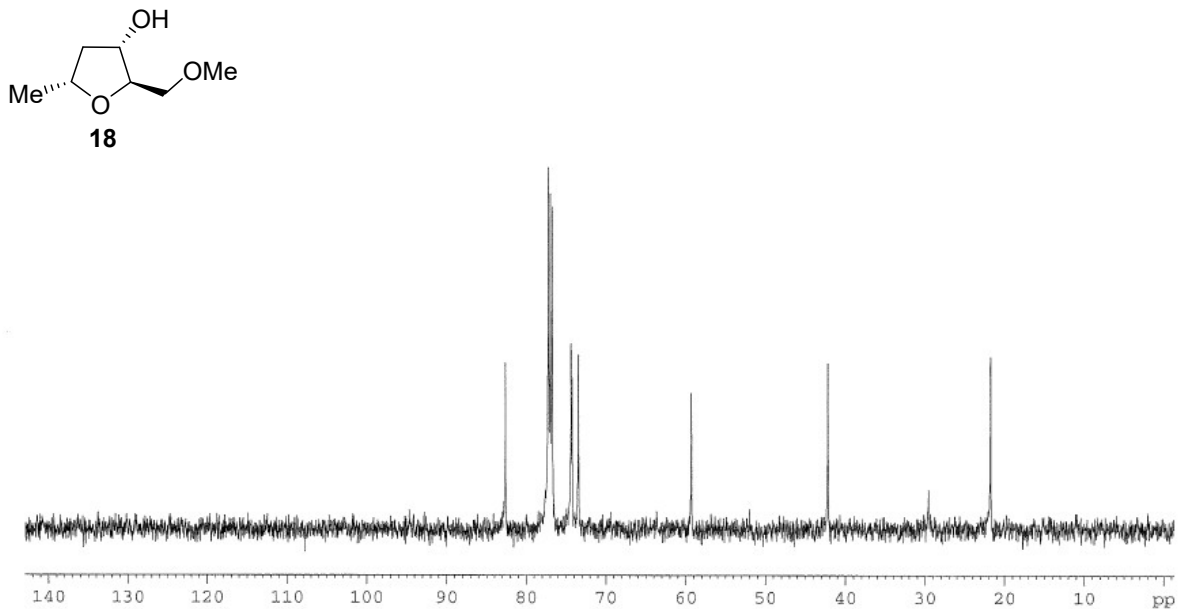

<sup>1</sup>H NMR (400 MHz, CDCl<sub>3</sub>)

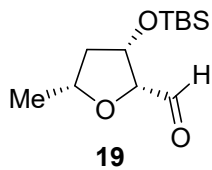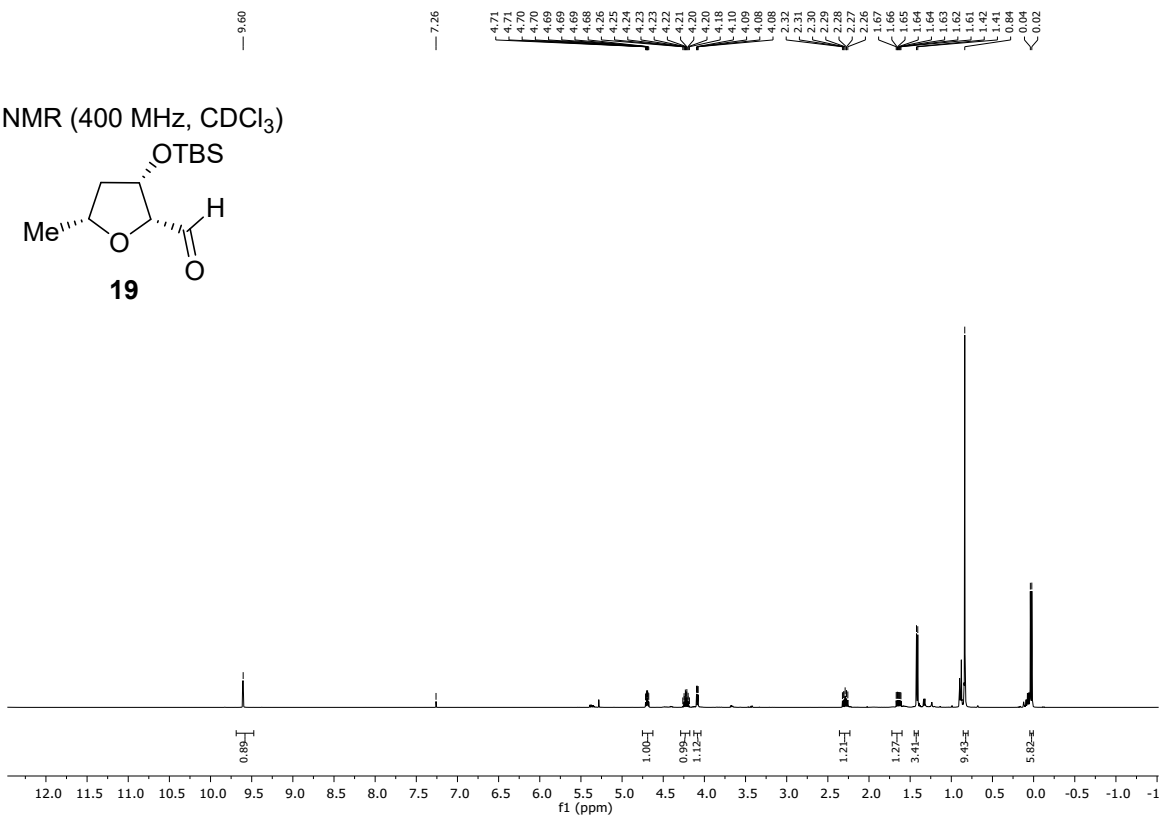

<sup>13</sup>C NMR (101 MHz, CDCl<sub>3</sub>)

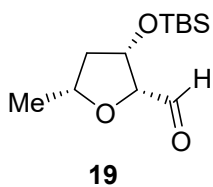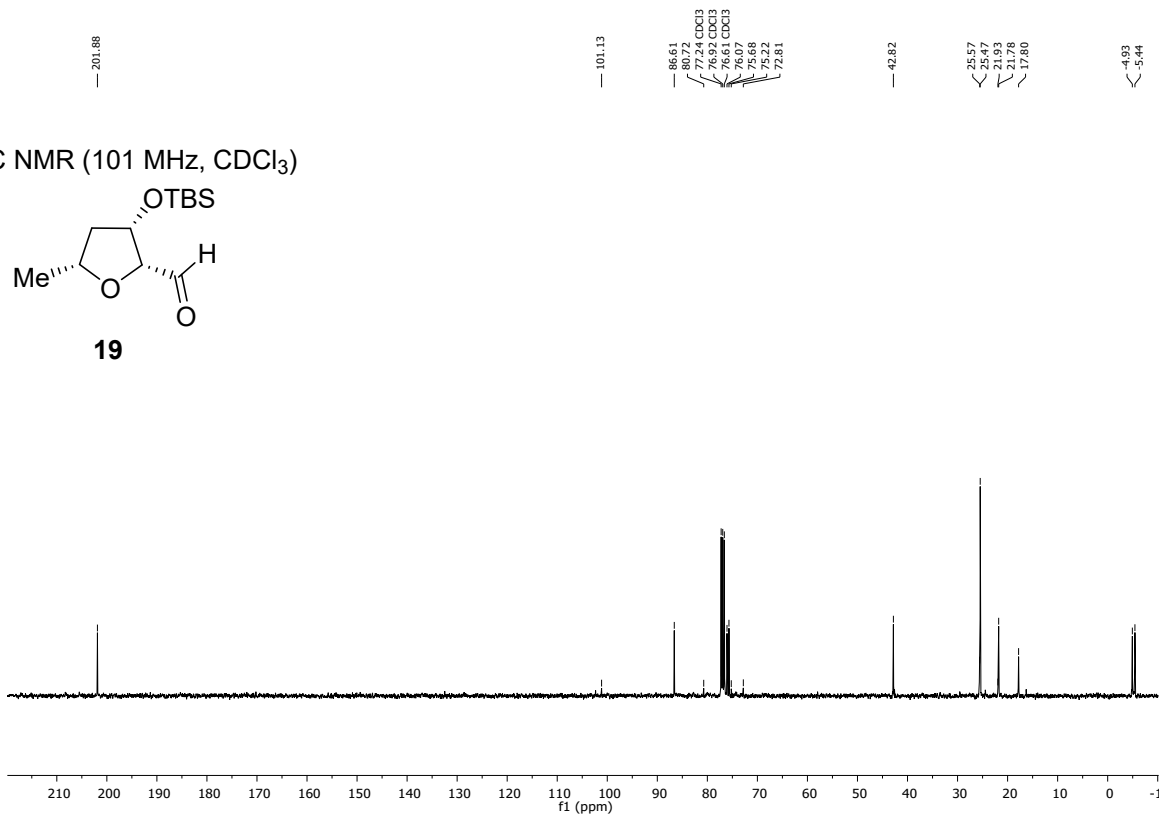

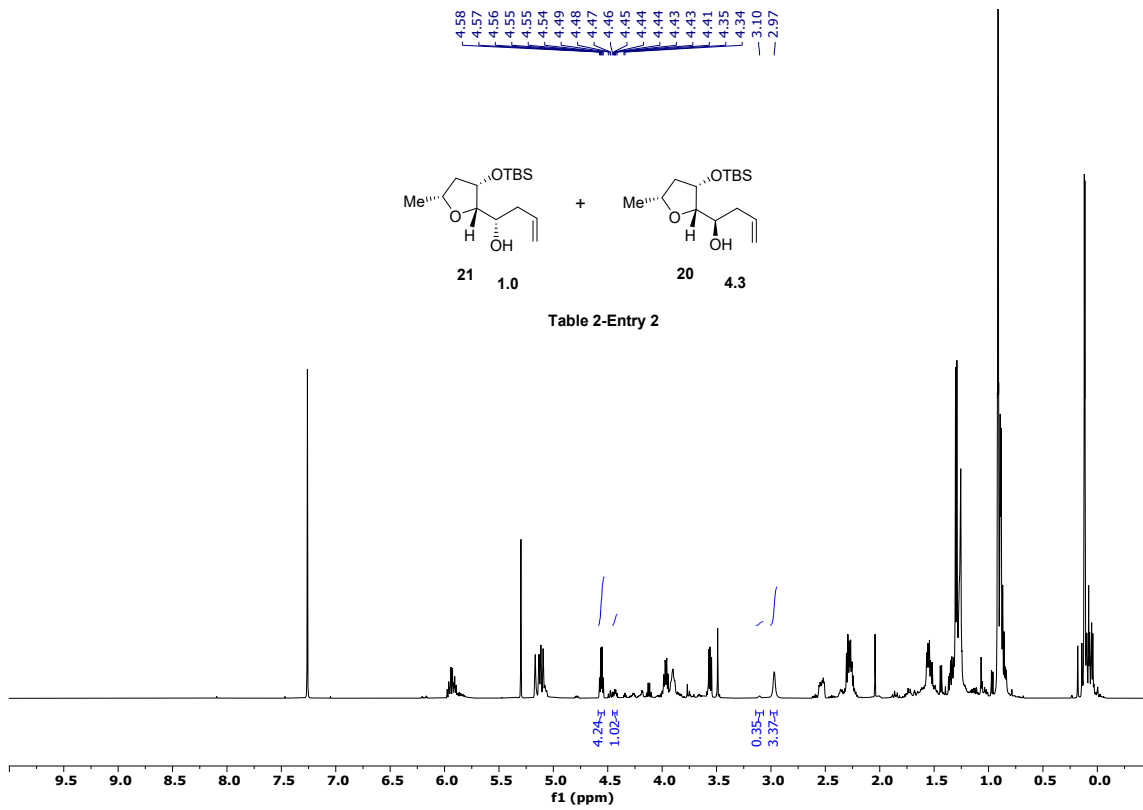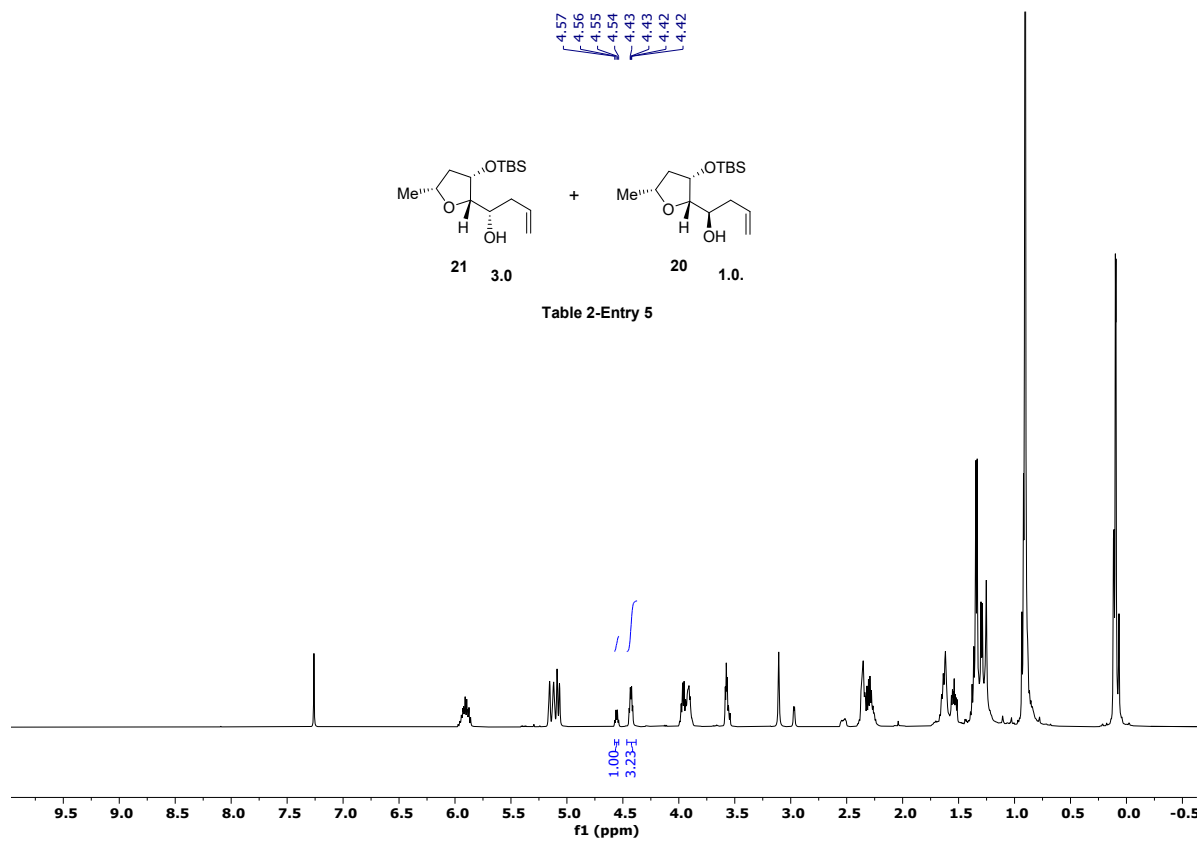



<sup>1</sup>H NMR (400 MHz, CDCl<sub>3</sub>)

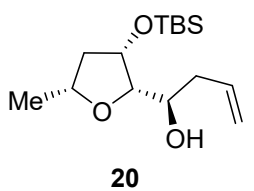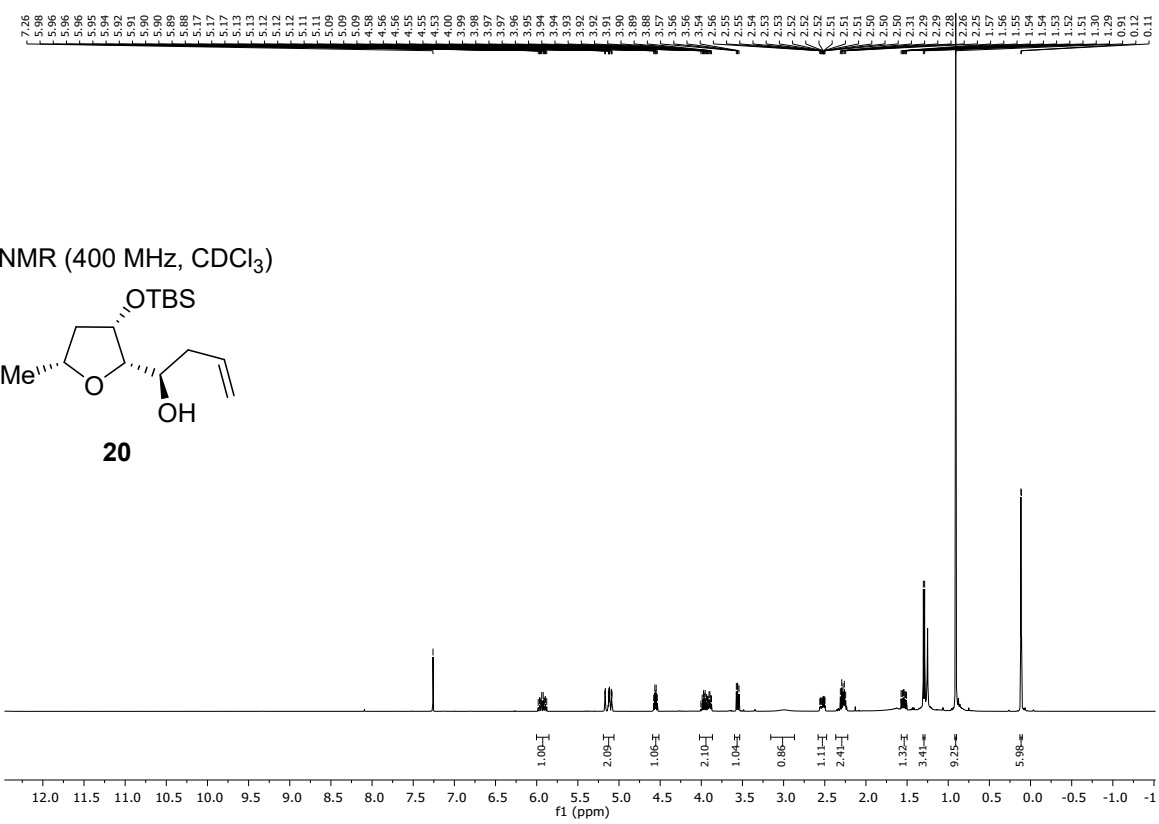

<sup>13</sup>C NMR (101 MHz, CDCl<sub>3</sub>)

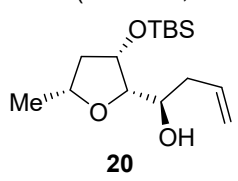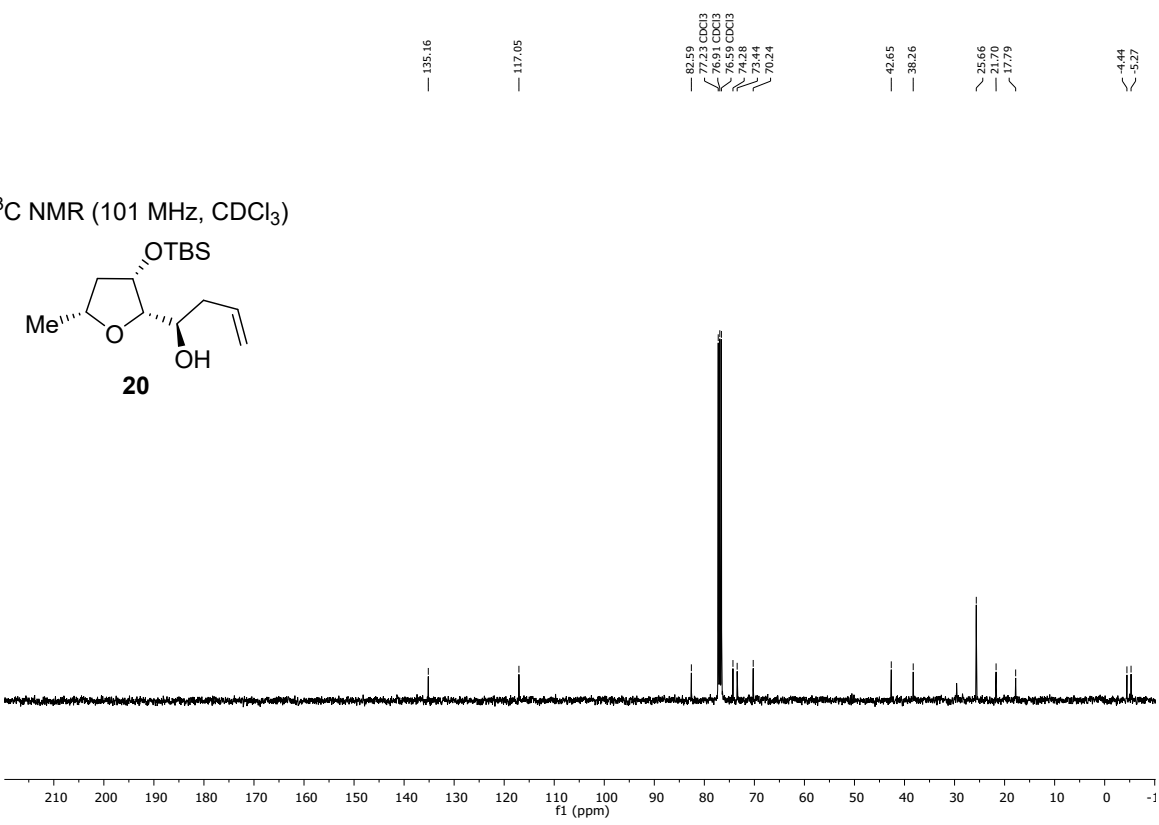

<sup>1</sup>H NMR (400 MHz, CDCl<sub>3</sub>)

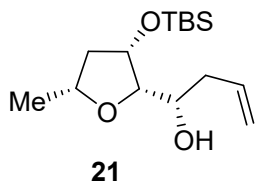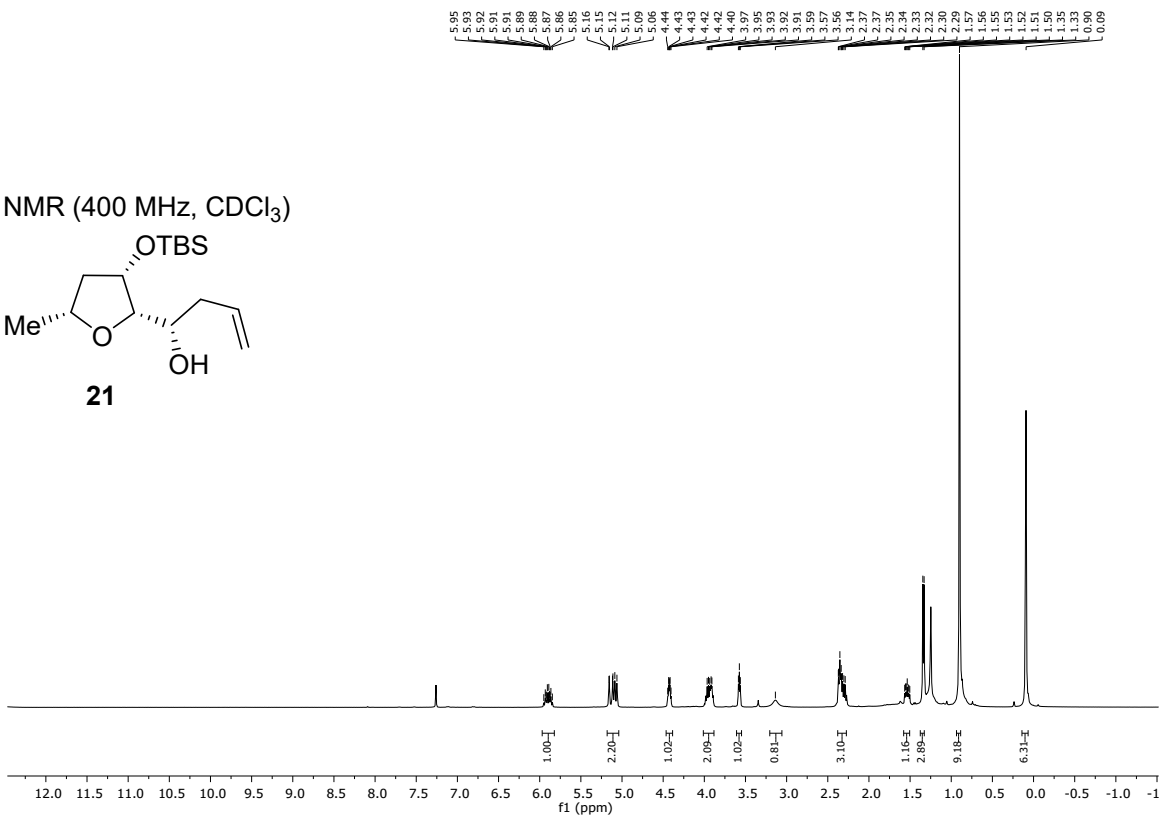

<sup>13</sup>C NMR (101 MHz, CDCl<sub>3</sub>)

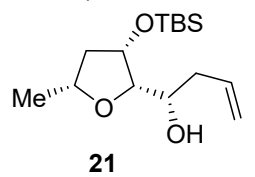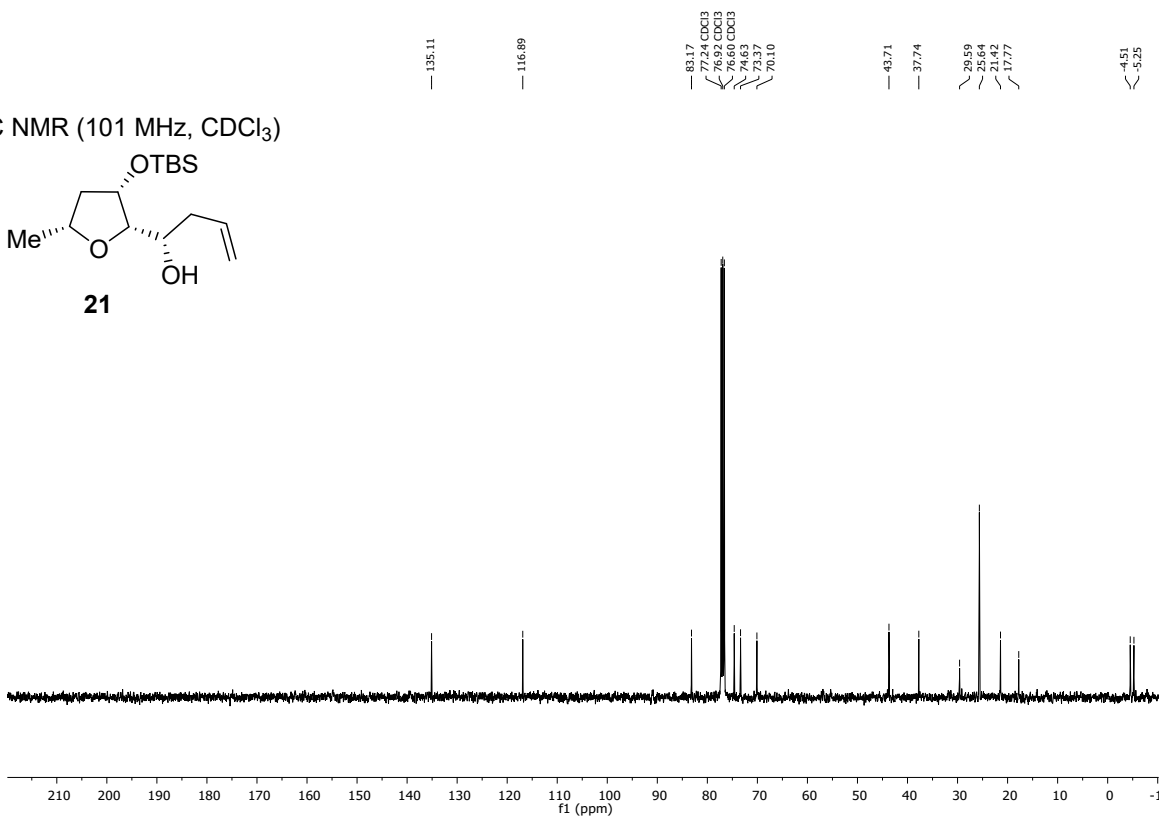

<sup>1</sup>H NMR (400 MHz, CDCl<sub>3</sub>)

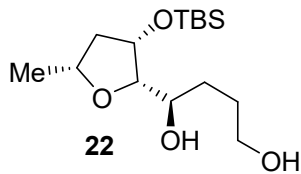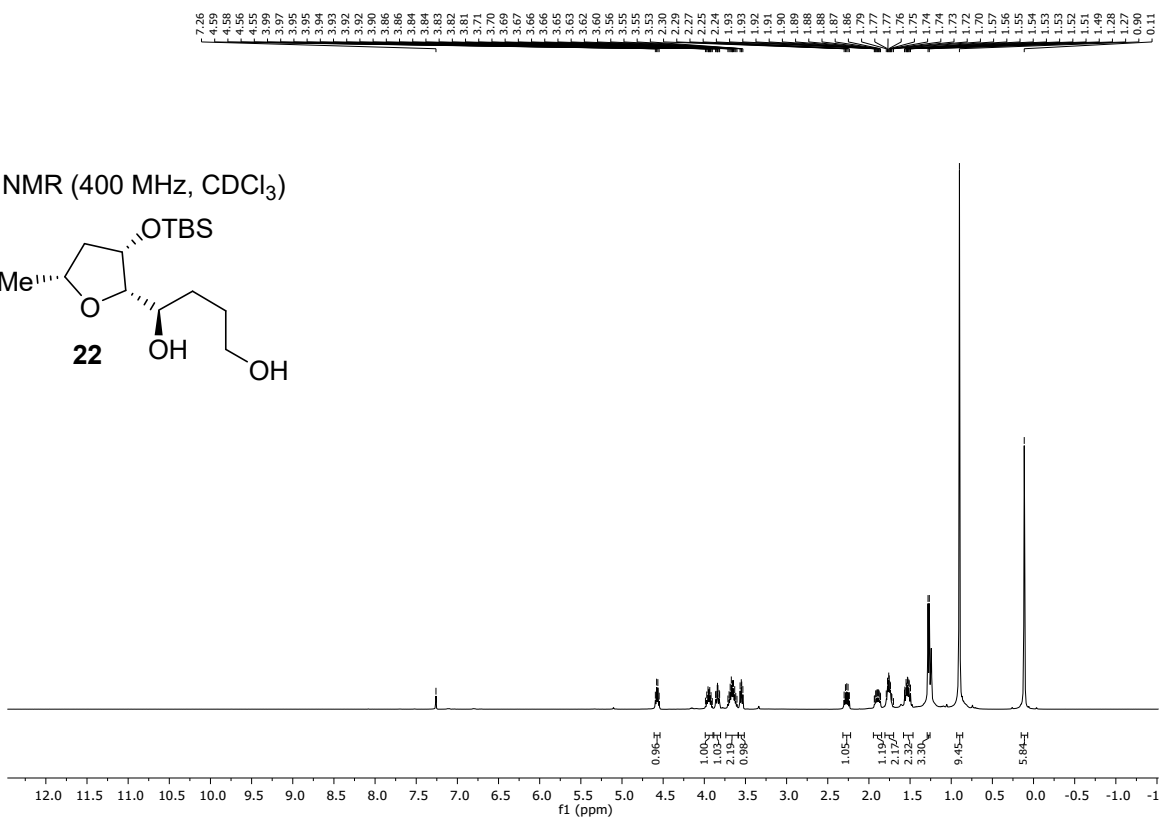

7.36, 4.69, 4.58, 4.56, 4.55, 3.99, 3.97, 3.95, 3.95, 3.94, 3.93, 3.92, 3.90, 3.86, 3.86, 3.84, 3.84, 3.83, 3.82, 3.81, 3.71, 3.70, 3.69, 3.67, 3.66, 3.66, 3.65, 3.63, 3.60, 3.56, 3.55, 3.55, 3.53, 2.29, 2.27, 2.25, 2.24, 2.18, 1.93, 1.93, 1.92, 1.91, 1.90, 1.89, 1.88, 1.88, 1.87, 1.86, 1.79, 1.77, 1.77, 1.76, 1.75, 1.74, 1.74, 1.73, 1.72, 1.70, 1.57, 1.56, 1.55, 1.54, 1.53, 1.53, 1.52, 1.51, 1.49, 1.49, 1.27, 1.27, 0.90, 0.11

<sup>13</sup>C NMR (101 MHz, CDCl<sub>3</sub>)

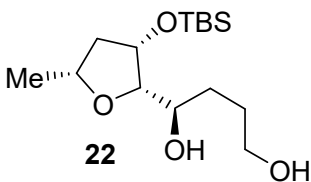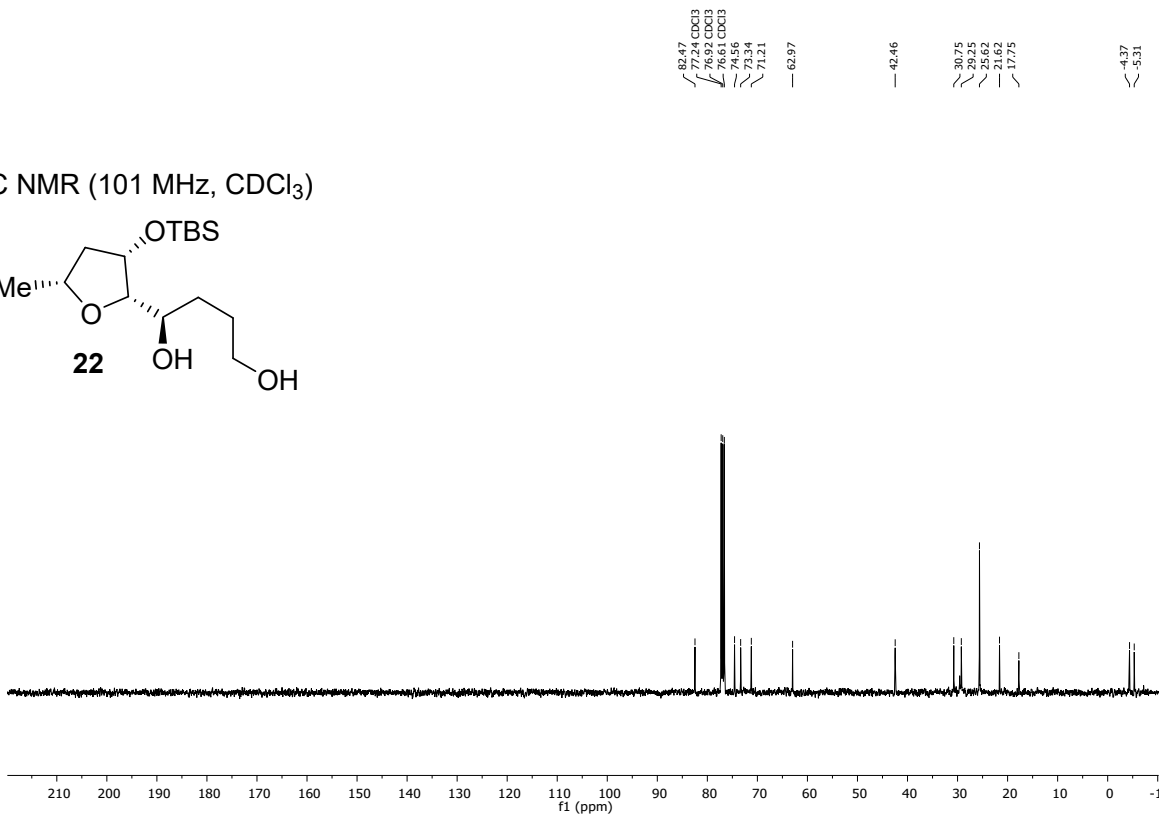

<sup>1</sup>H NMR (400 MHz, CDCl<sub>3</sub>)

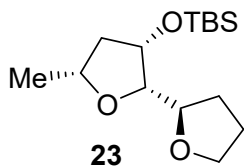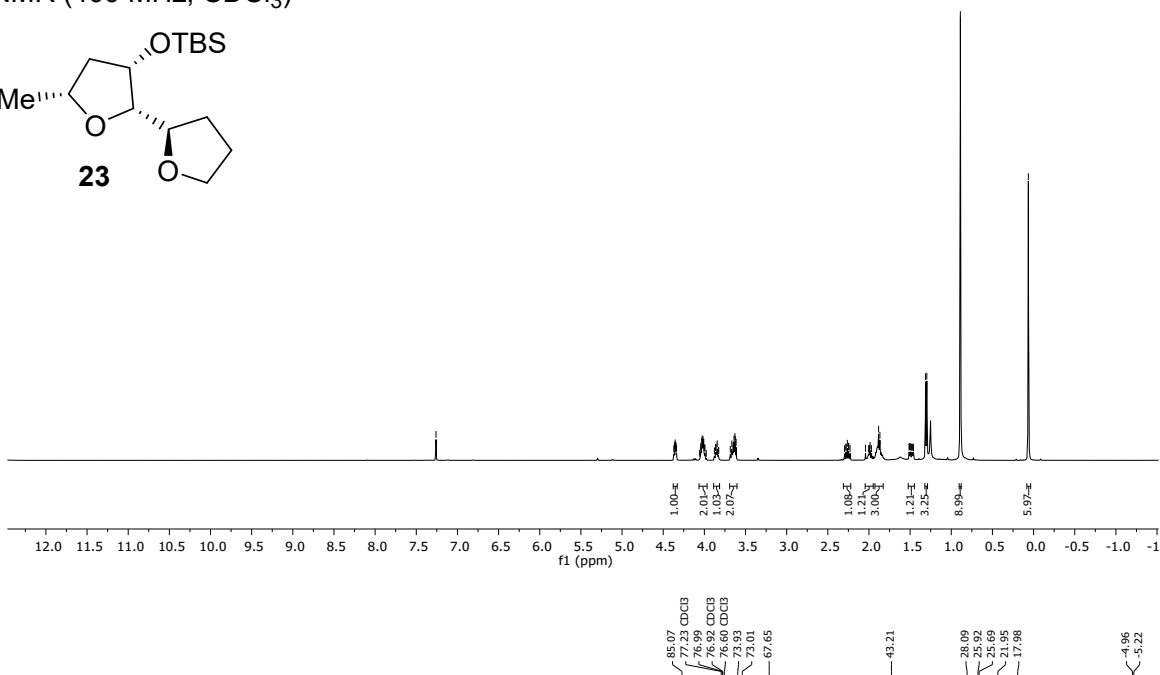

<sup>13</sup>C NMR (101 MHz, CDCl<sub>3</sub>)

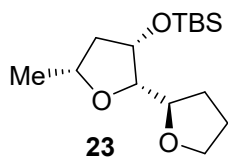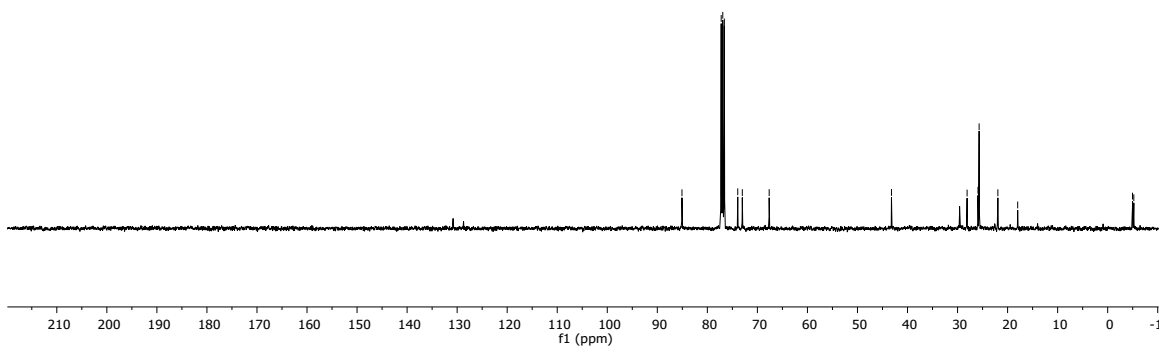

$^1\text{H}$  NMR (400 MHz,  $\text{CDCl}_3$ )

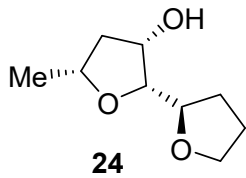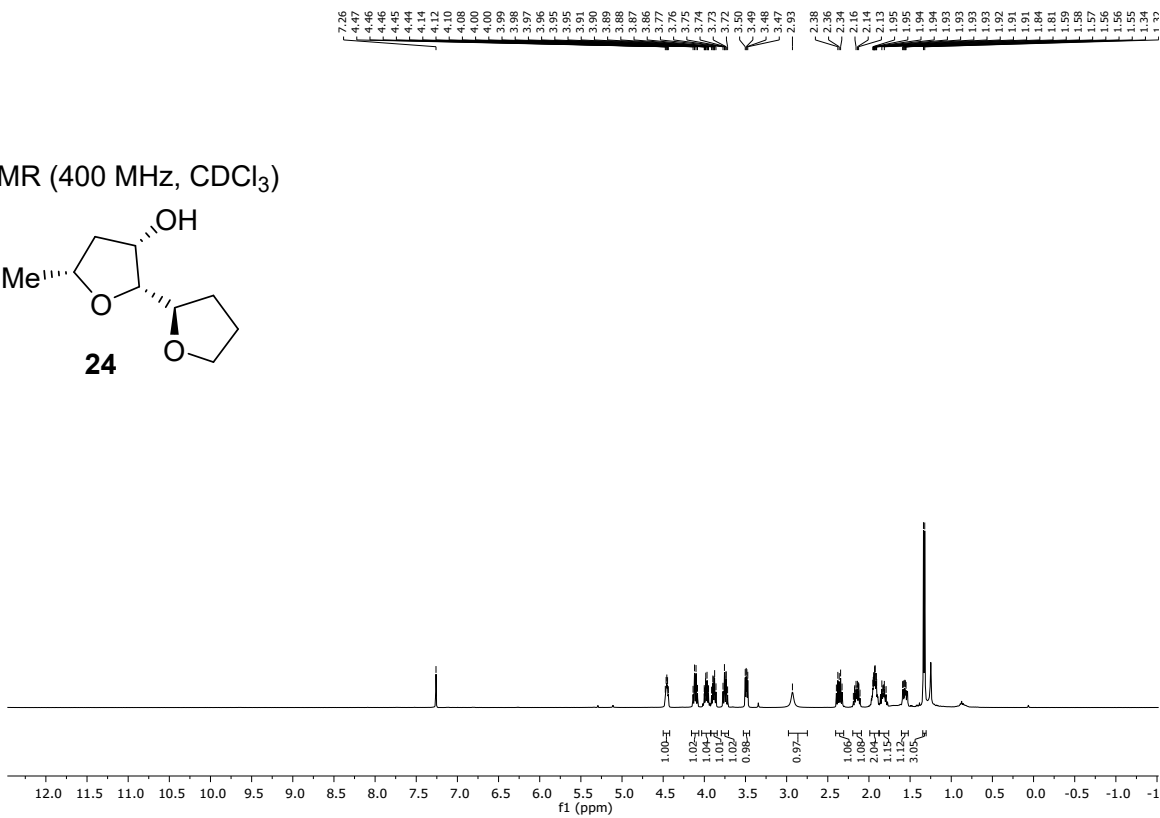

$^{13}\text{C}$  NMR (101 MHz,  $\text{CDCl}_3$ )

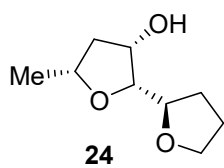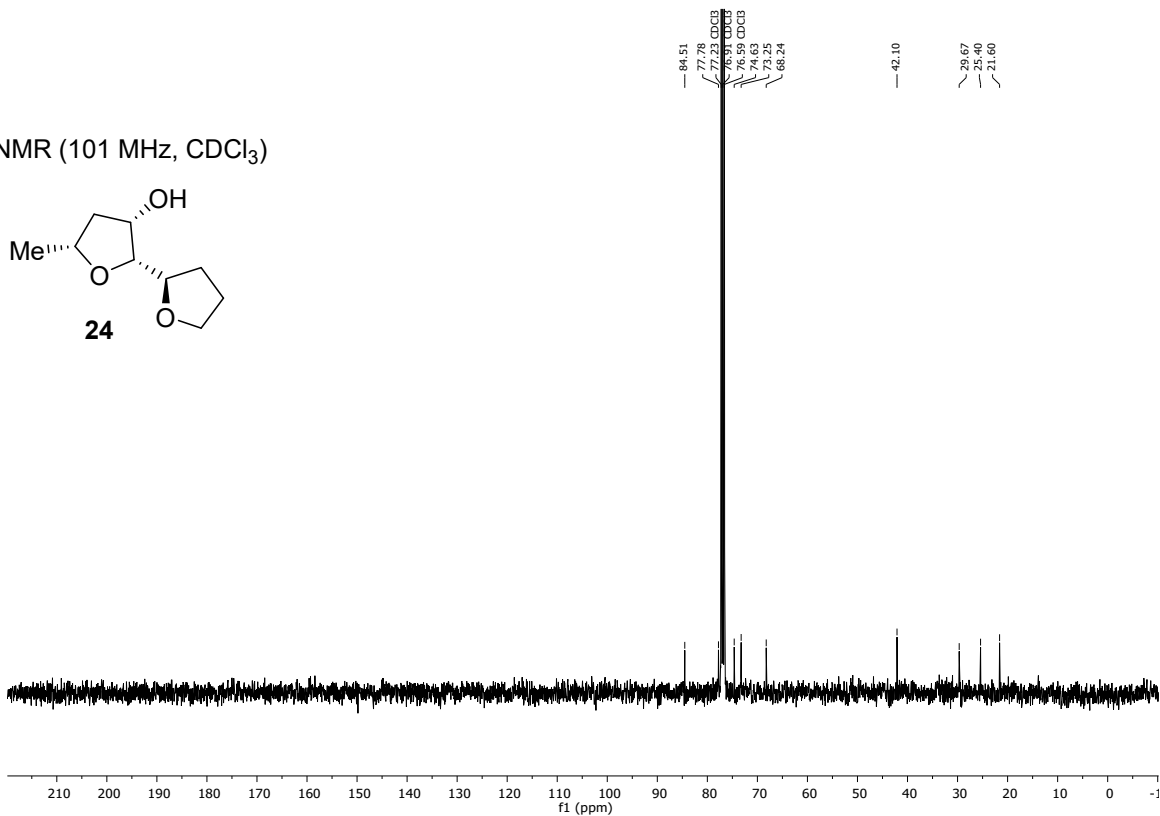

<sup>1</sup>H NMR (400 MHz, CDCl<sub>3</sub>)

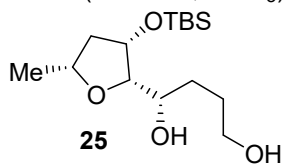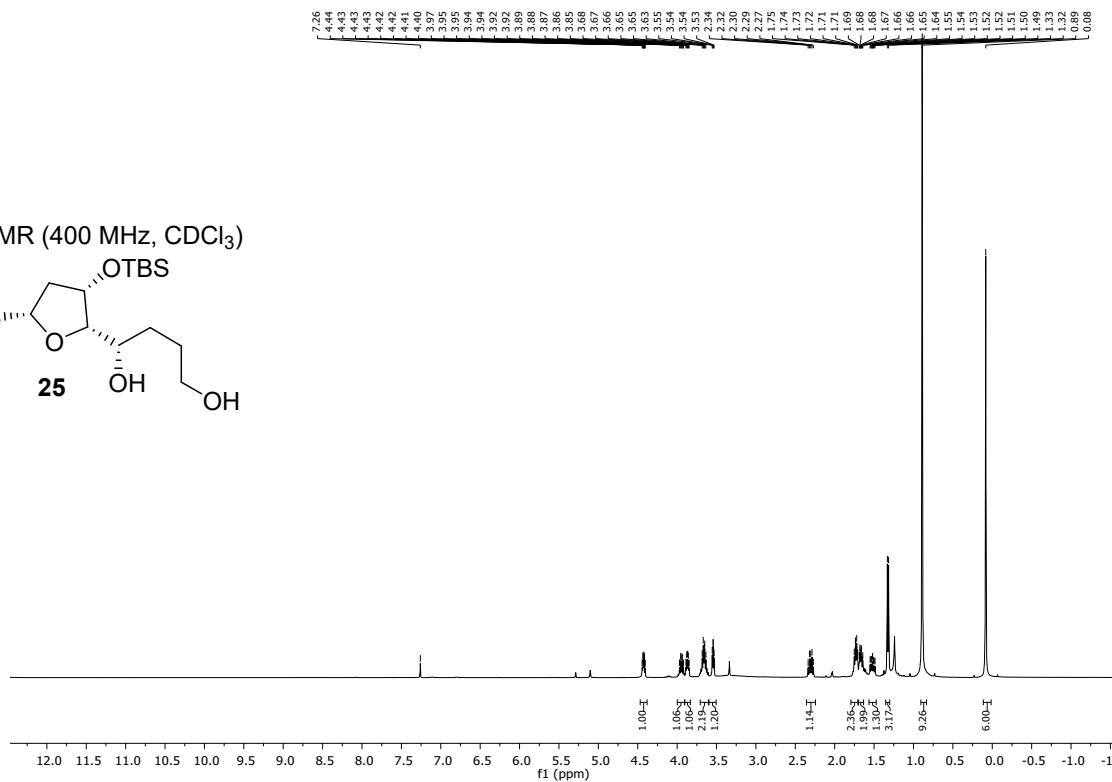

84.11  
77.25 CDCl<sub>3</sub>  
76.93 CDCl<sub>3</sub>  
74.62 CDCl<sub>3</sub>  
73.43  
70.77  
62.83  
43.69  
30.61  
29.76  
25.61  
21.37  
17.75  
4.54  
-5.29

<sup>13</sup>C NMR (101 MHz, CDCl<sub>3</sub>)

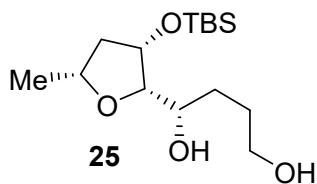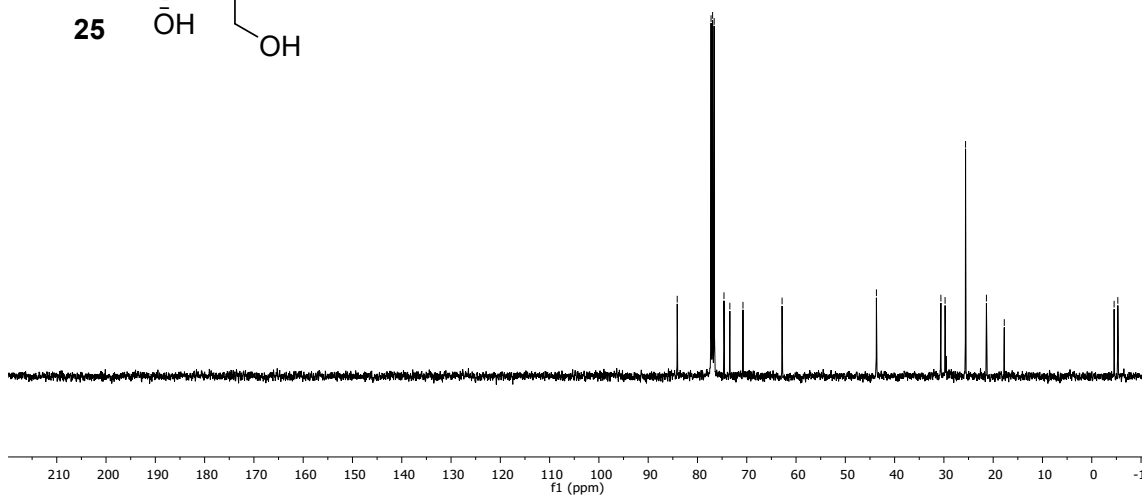

<sup>1</sup>H NMR (400 MHz, CDCl<sub>3</sub>)

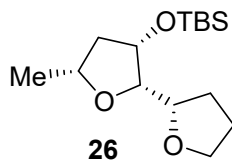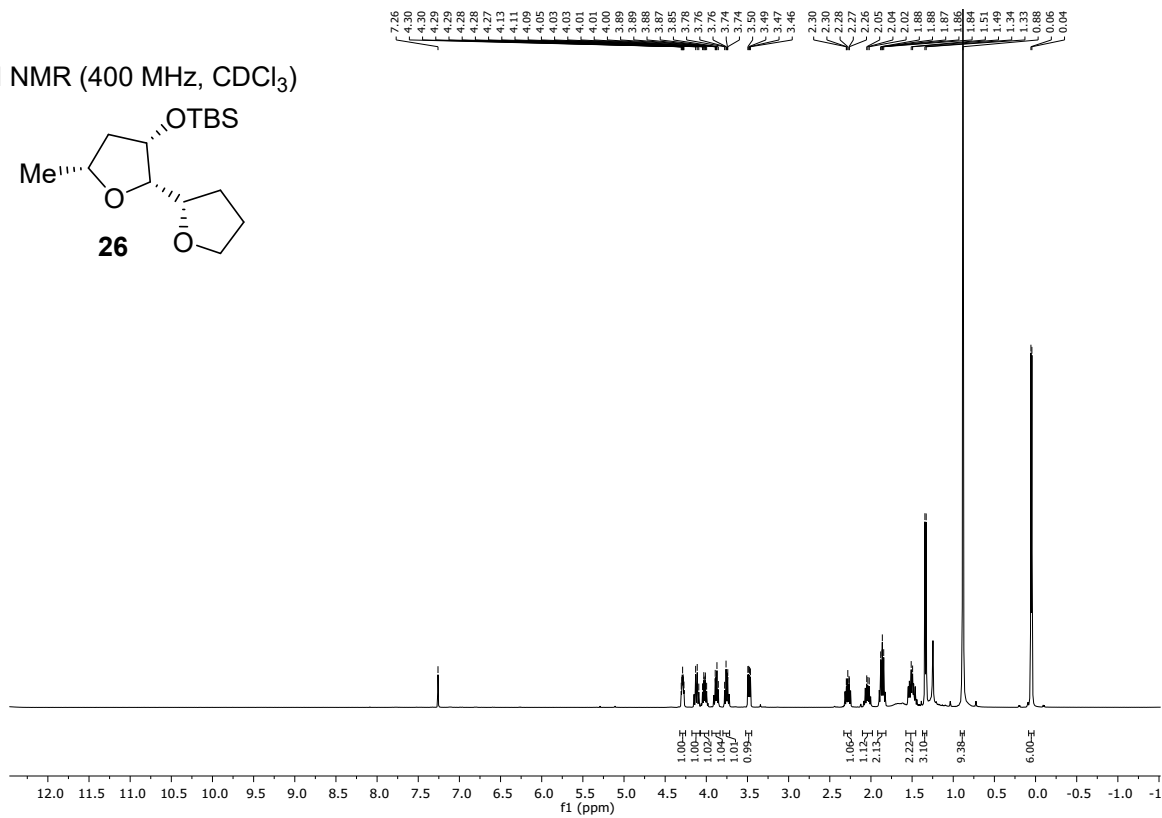

86.15, 77.24, 76.82, 74.38, 73.40, 67.86, 43.49, 28.03, 25.79, 25.63, 21.97, 17.79, 4.23, -5.25

<sup>13</sup>C NMR (101 MHz, CDCl<sub>3</sub>)

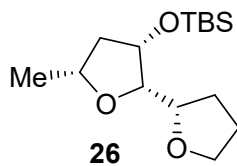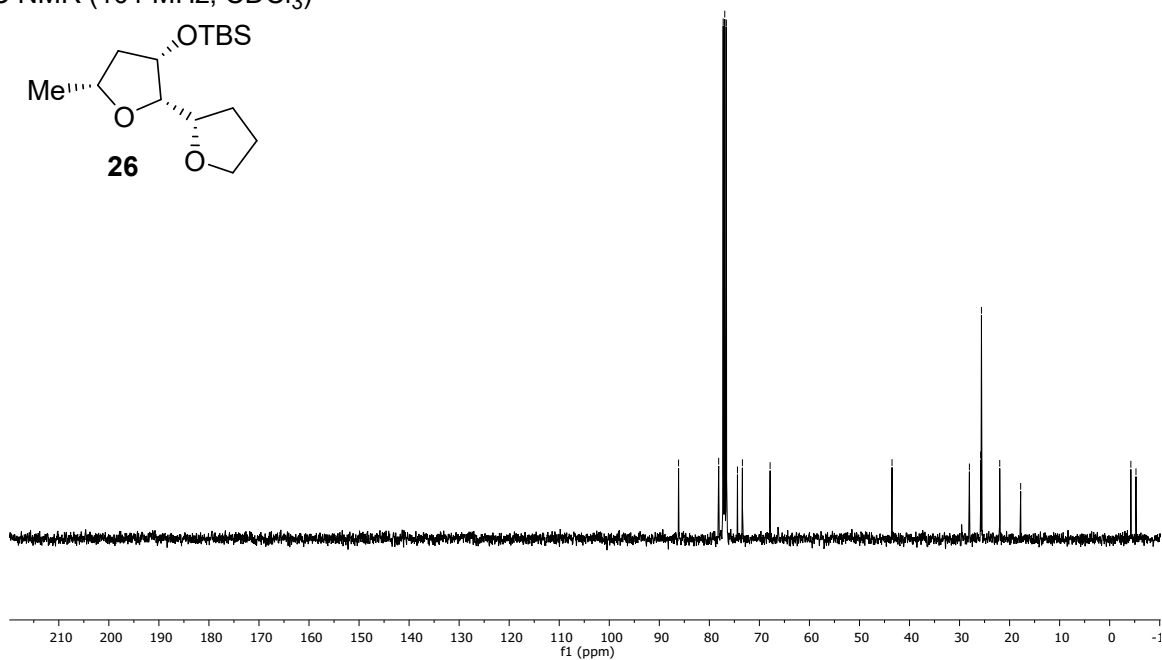

<sup>1</sup>H NMR (400 MHz, CDCl<sub>3</sub>)

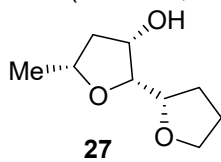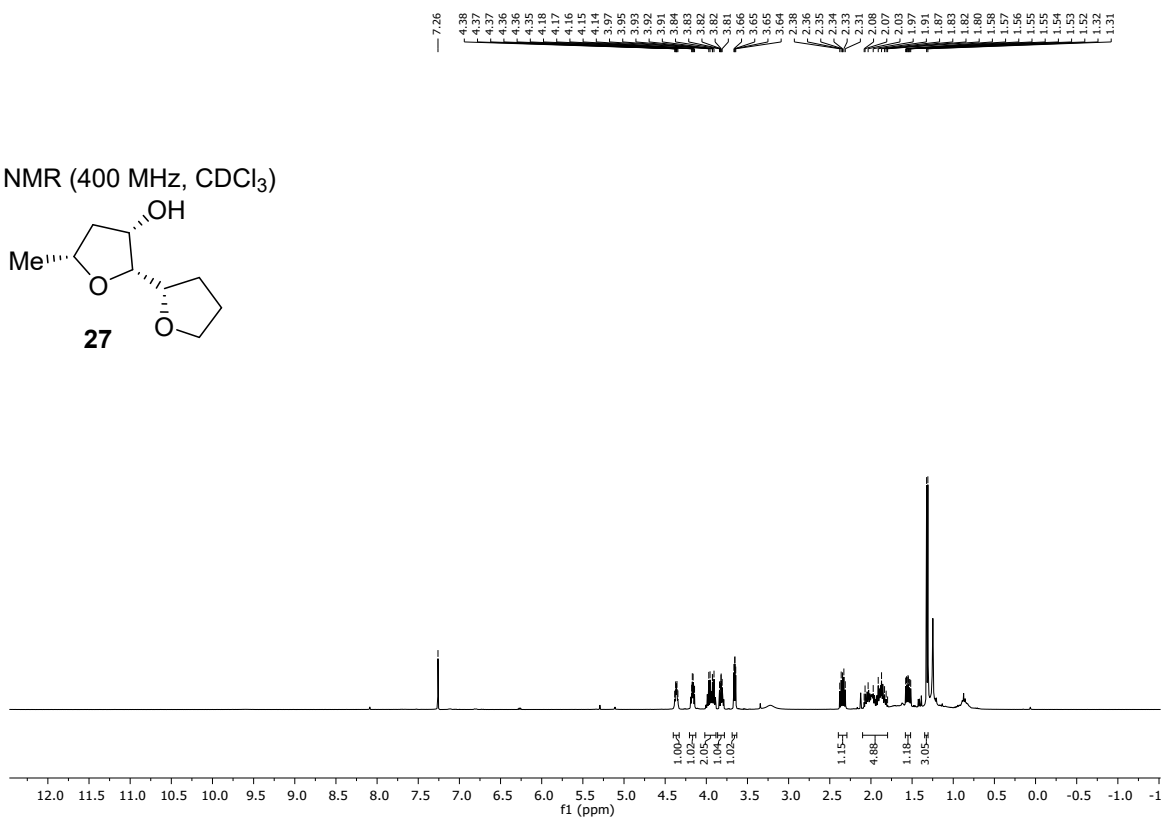

<sup>13</sup>C NMR (101 MHz, CDCl<sub>3</sub>)

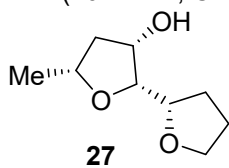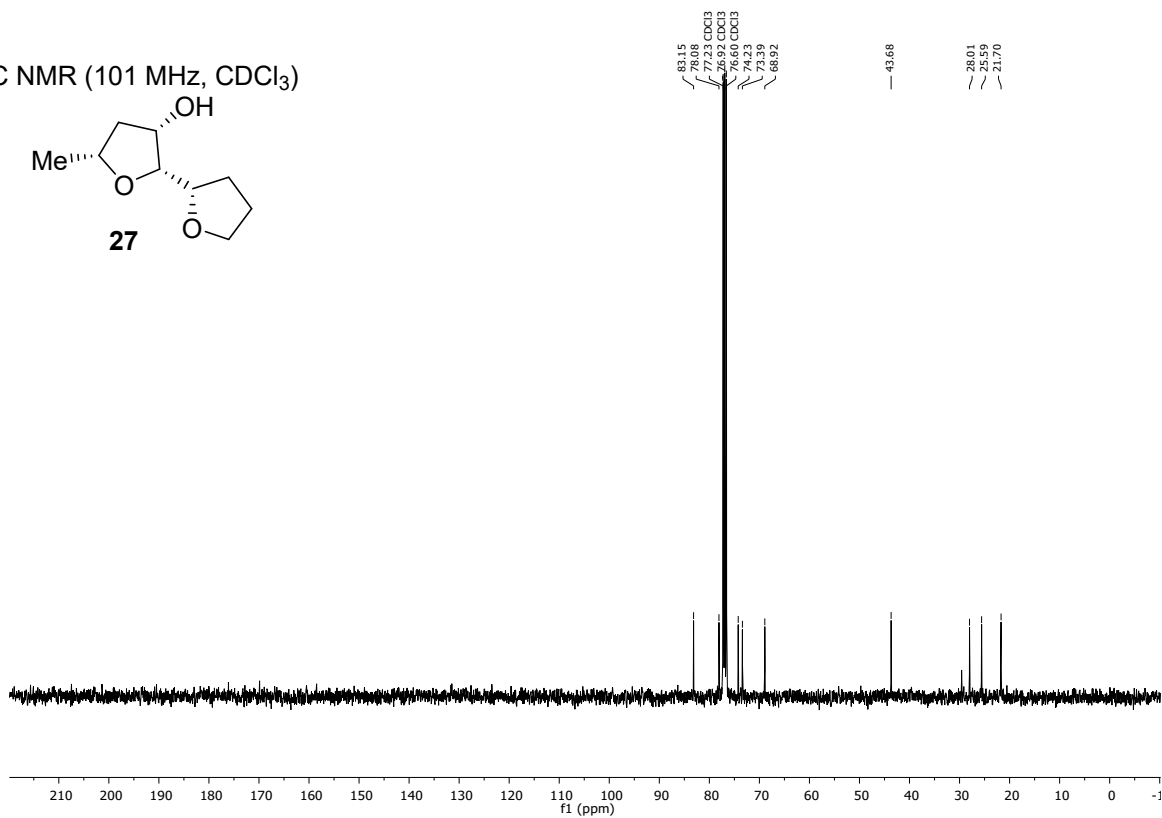



8.29  
8.27  
7.39  
7.37  
7.26  
6.99  
5.89  
5.88  
5.87  
5.85  
5.84  
5.83  
5.81  
5.27  
5.27  
5.26  
5.26  
5.25  
5.24  
5.24  
5.20  
5.20  
5.19  
5.16  
5.15  
5.15  
5.13  
5.12  
5.12  
5.11  
5.10  
5.10  
5.09  
5.09  
4.04  
4.04  
4.03  
4.03  
4.01  
4.01  
4.01  
3.99  
3.99  
3.86  
3.85  
3.84  
3.84  
3.83  
3.83  
3.82  
3.81  
2.62  
2.62  
2.62  
2.60  
2.58  
2.58  
2.56  
2.55  
2.55  
2.54  
2.54  
2.53  
2.53  
2.52  
2.52  
2.51  
2.50  
2.50  
2.50  
2.49  
2.48  
2.48  
2.46  
1.75  
1.75  
1.73  
1.73  
1.72  
1.72  
1.71  
1.71  
1.70  
1.69  
1.69  
1.37  
1.36

<sup>1</sup>H NMR (400 MHz, CDCl<sub>3</sub>)

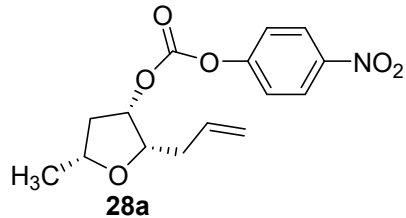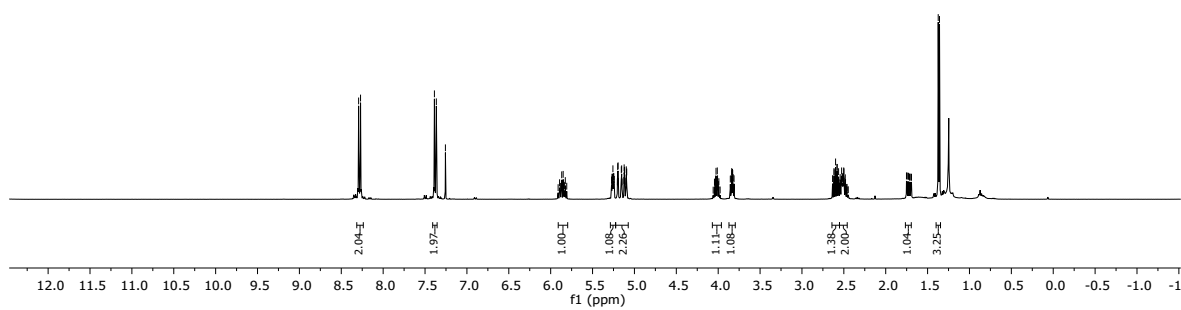

155.37  
152.11  
145.32  
133.90  
125.23  
121.64  
117.35  
80.87  
80.68  
77.24  
76.86  
73.69  
40.50  
33.38  
21.26

<sup>13</sup>C NMR (101 MHz, CDCl<sub>3</sub>)

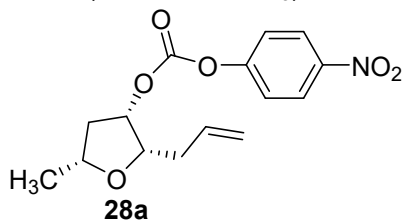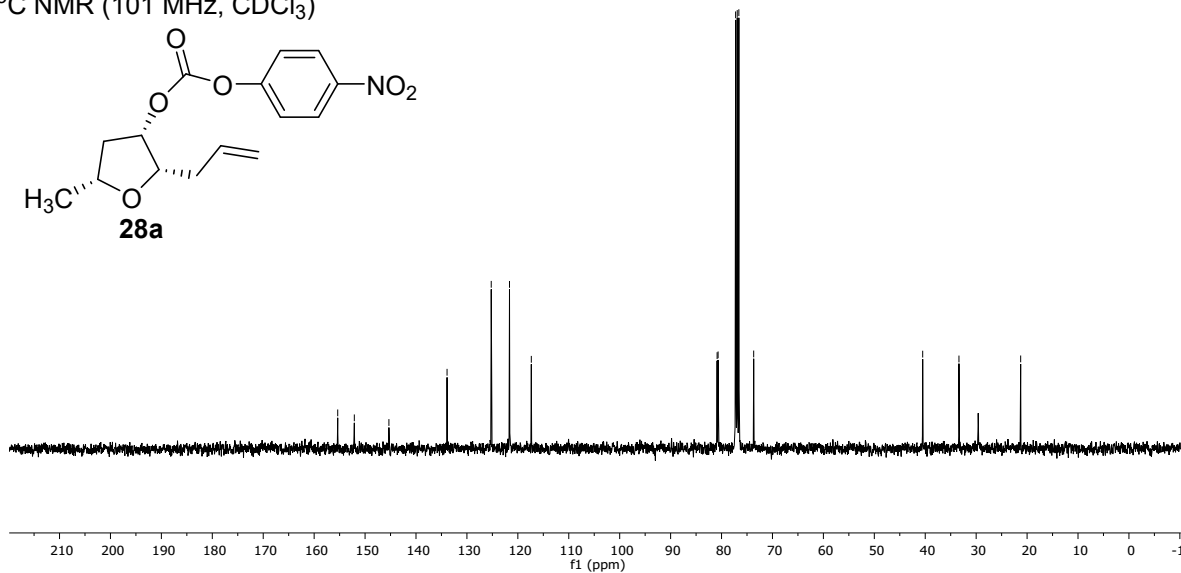

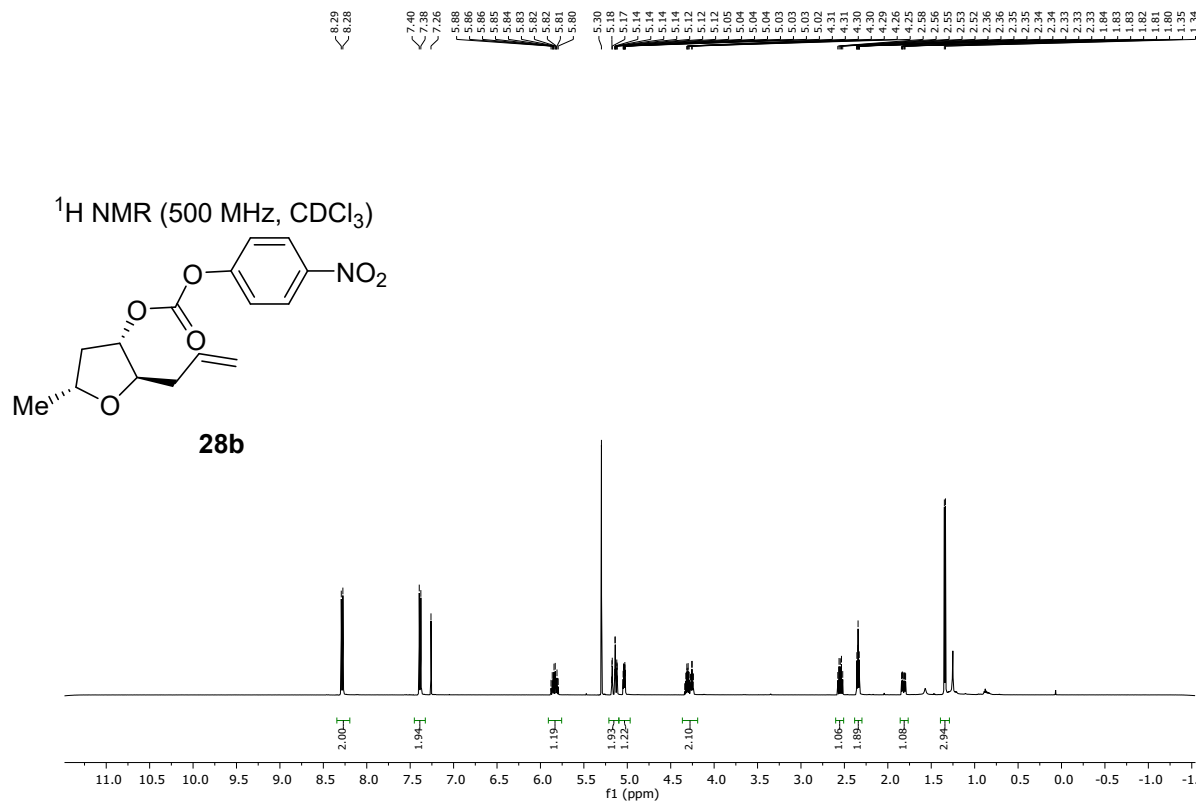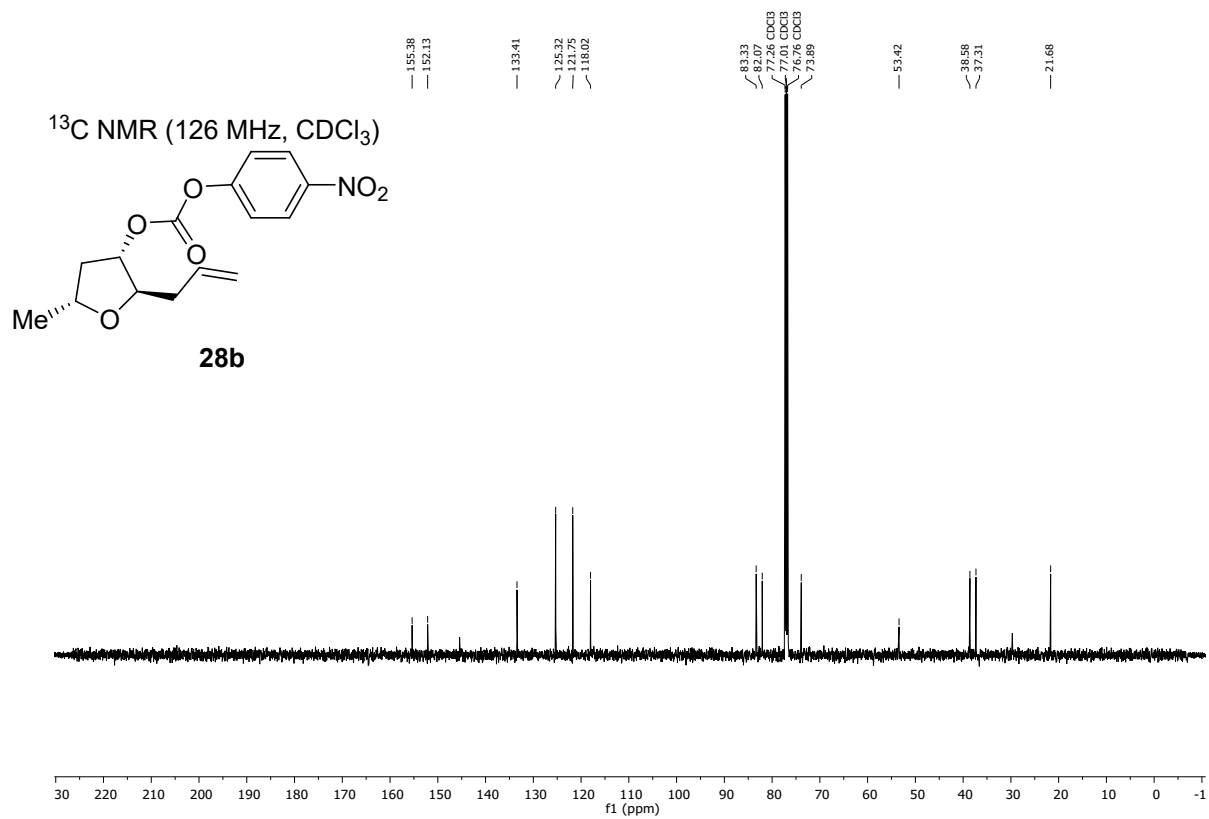

H1 standard parameters, CDC13, QNP probe.

13741113

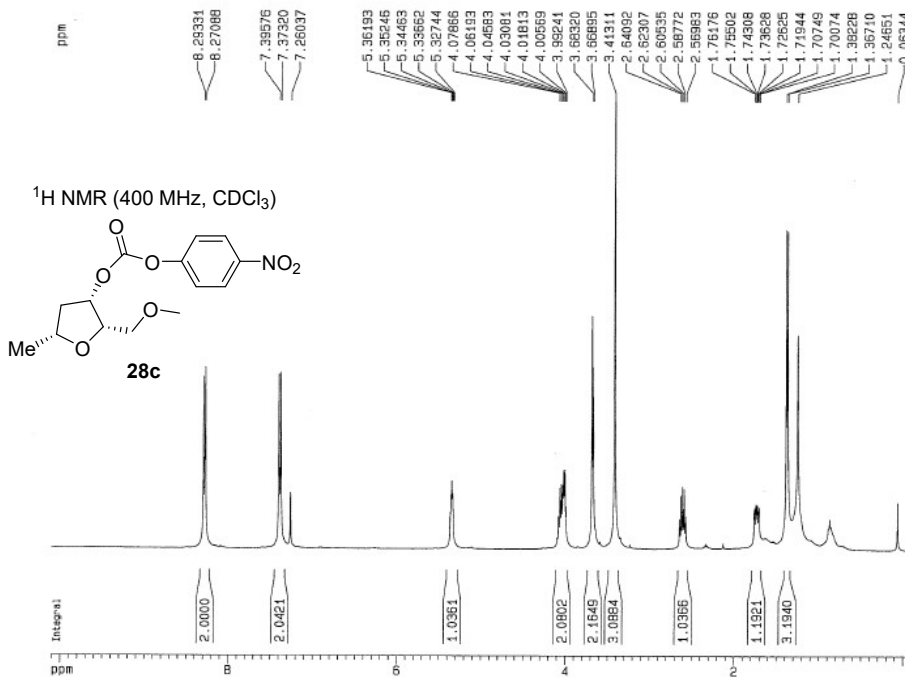

Current Data Parameters  
NAME DL-1-170  
EXPNO 1  
PROCNO 1

F2 - Acquisition Parameters  
Date\_ 20170523  
Time 15.33  
INSTRUM spect  
PROBHD 5 mm QNP 1H  
PULPROG zg30  
TD 16384  
SOLVENT CDC13  
NS 8  
DS 2  
SWH 5617.978 Hz  
FIDRES 0.342854 Hz  
AQ 1.4582260 sec  
RG 2048  
DM 89.000 usec  
DE 127.14 usec  
TE 300.0 K  
D1 2.0000000 sec  
P1 9.50 usec  
SFO1 400.1554000 MHz  
NUCLEUS 1H

F2 - Processing parameters  
SI 8192  
SF 400.1559550 MHz  
WDW EM  
SSB 0  
LB 0.30 Hz  
GB 0  
PC 1.00

1D NMR plot parameters  
CX 20.00 cm  
F1P 10.100 ppm  
F1 4041.69 Hz  
F2P -0.100 ppm  
F2 -40.02 Hz  
PPM0 0.51800 ppm/cm  
HZCM 204.08516 Hz/cm

<sup>13</sup>C standard parameters, CDC13, QNP probe.

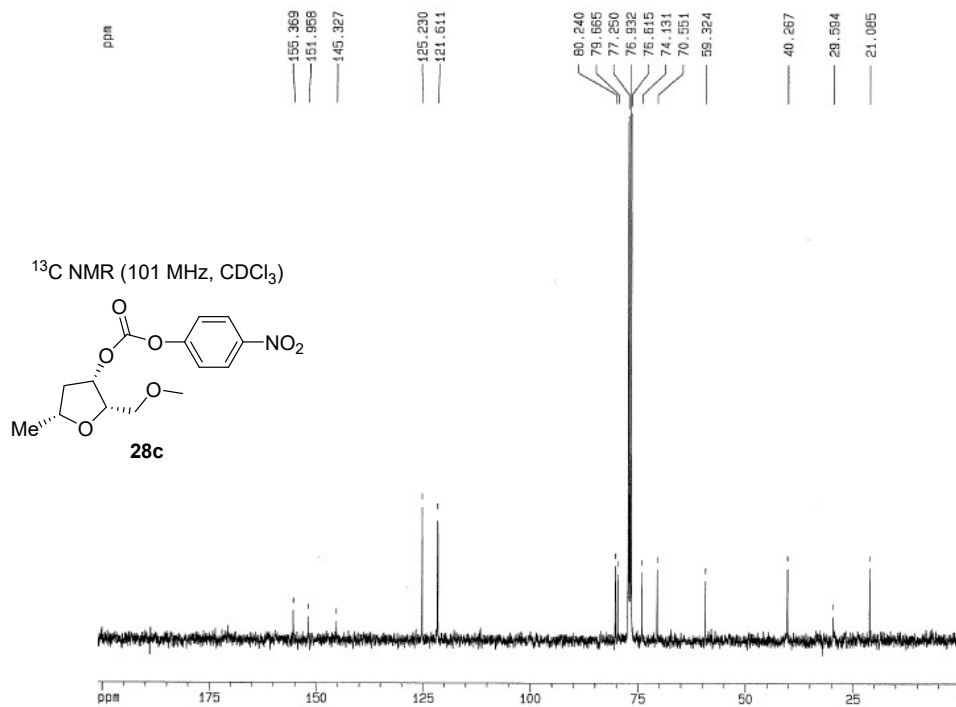

Current Data Parameters  
NAME DL-1-170  
EXPNO 2  
PROCNO 1

F2 - Acquisition Parameters  
Date\_ 20170523  
Time 15.36  
INSTRUM spect  
PROBHD 5 mm QNP 1H  
PULPROG zgpg30  
TD 32768  
SOLVENT CDC13  
NS 206  
DS 2  
SWH 23809.523 Hz  
FIDRES 0.726609 Hz  
AQ 0.6881790 sec  
RG 16384  
DM 21.000 usec  
DE 30.00 usec  
TE 300.0 K  
D12 0.00002000 sec  
DL6 21.00 dB  
D1 2.00000000 sec  
CQPRPG waltz16  
P31 76.00 usec  
D11 0.03000000 sec  
DL5 18.00 dB  
P1 8.60 usec  
SFO1 100.6330000 MHz  
NUCLEUS 13C

F2 - Processing parameters  
SI 16384  
SF 100.6220720 MHz  
WDW EM  
SSB 0  
LB 3.00 Hz  
GB 0  
PC 1.00

1D NMR plot parameters  
CX 20.00 cm  
F1P 201.000 ppm  
F1 20225.04 Hz  
F2P -1.000 ppm  
F2 -100.62 Hz  
PPM0 10.10000 ppm/cm  
HZCM 1016.28290 Hz/cm

8.29  
8.27  
7.39  
7.38  
7.26  
5.23  
5.23  
5.23  
5.21  
5.21  
5.21  
5.21  
4.39  
4.38  
4.37  
4.36  
4.35  
4.34  
4.33  
4.31  
4.30  
4.29  
4.29  
3.55  
3.54  
3.53  
3.52  
3.52  
3.51  
3.50  
3.39  
2.60  
2.57  
2.55  
2.54  
1.85  
1.83  
1.83  
1.82  
1.81  
1.80  
1.80  
1.34  
1.33

<sup>1</sup>H NMR (500 MHz, CDCl<sub>3</sub>)

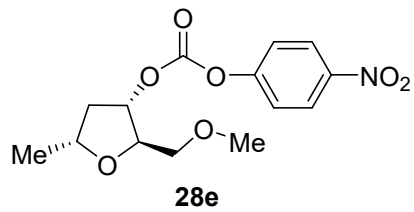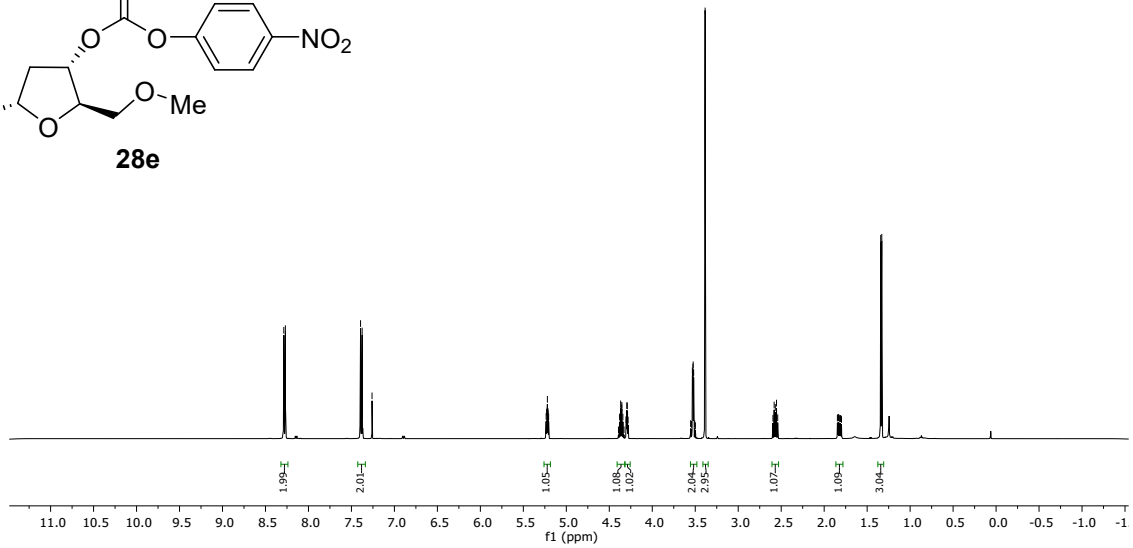

155.37  
152.20  
145.45  
125.32  
121.74  
81.88  
81.68  
77.28 CDCl<sub>3</sub>  
77.03 CDCl<sub>3</sub>  
76.77 CDCl<sub>3</sub>  
75.15  
73.07  
59.45  
39.18  
21.51

<sup>13</sup>C NMR (126 MHz, CDCl<sub>3</sub>)

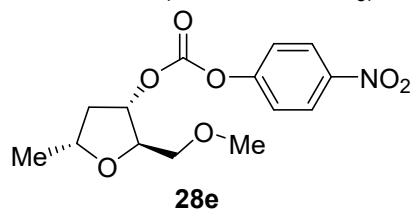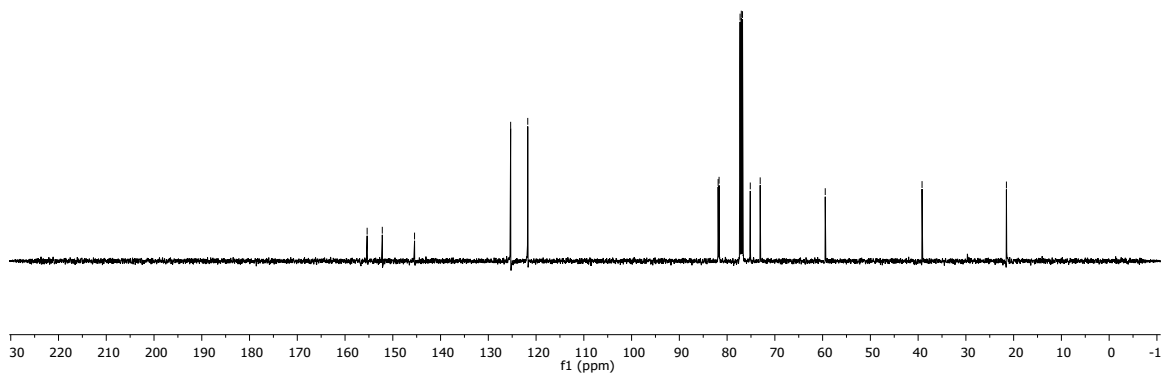

<sup>1</sup>H NMR (400 MHz, CDCl<sub>3</sub>)

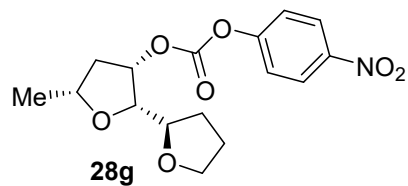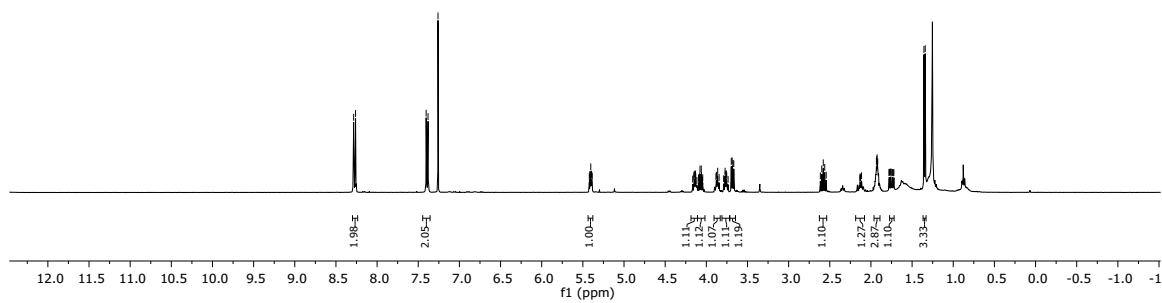

<sup>13</sup>C NMR (101 MHz, CDCl<sub>3</sub>)

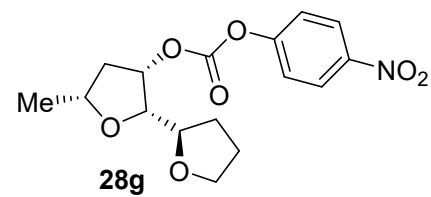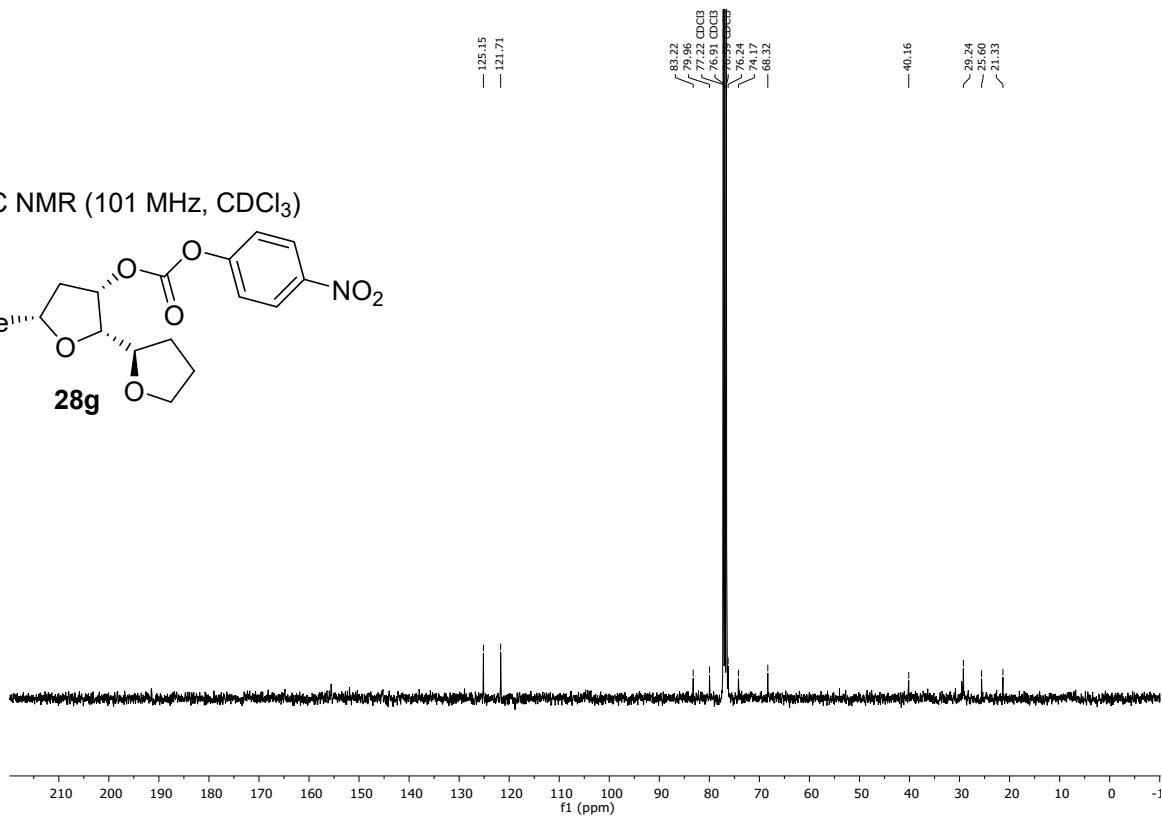

<sup>1</sup>H NMR (400 MHz, CDCl<sub>3</sub>)

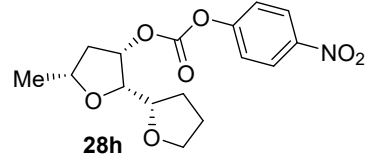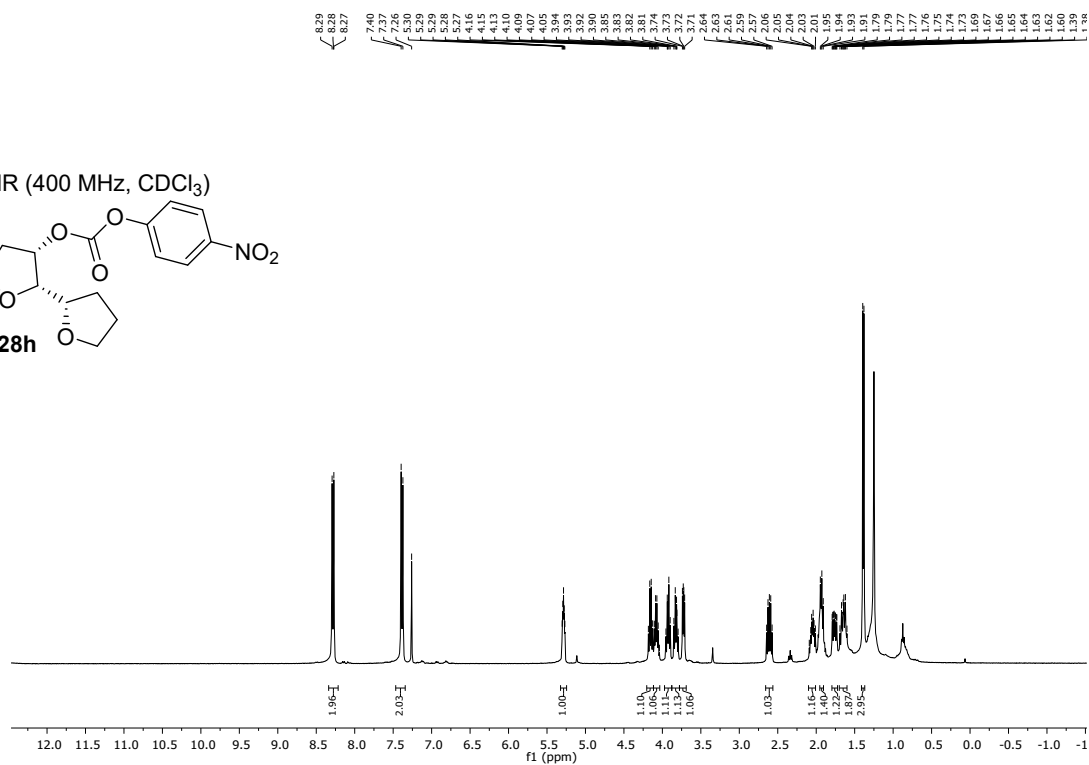

<sup>13</sup>C NMR (101 MHz, CDCl<sub>3</sub>)

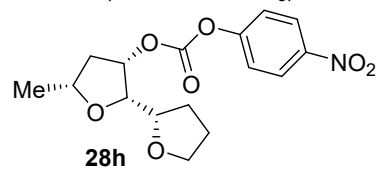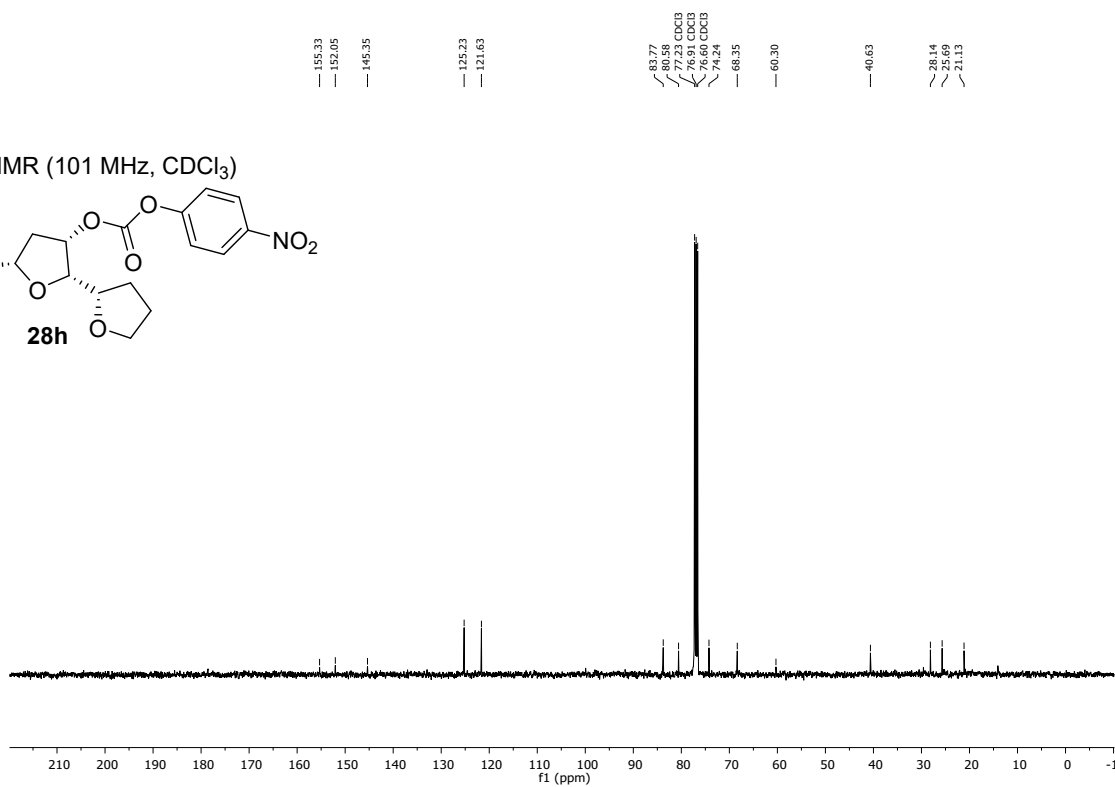

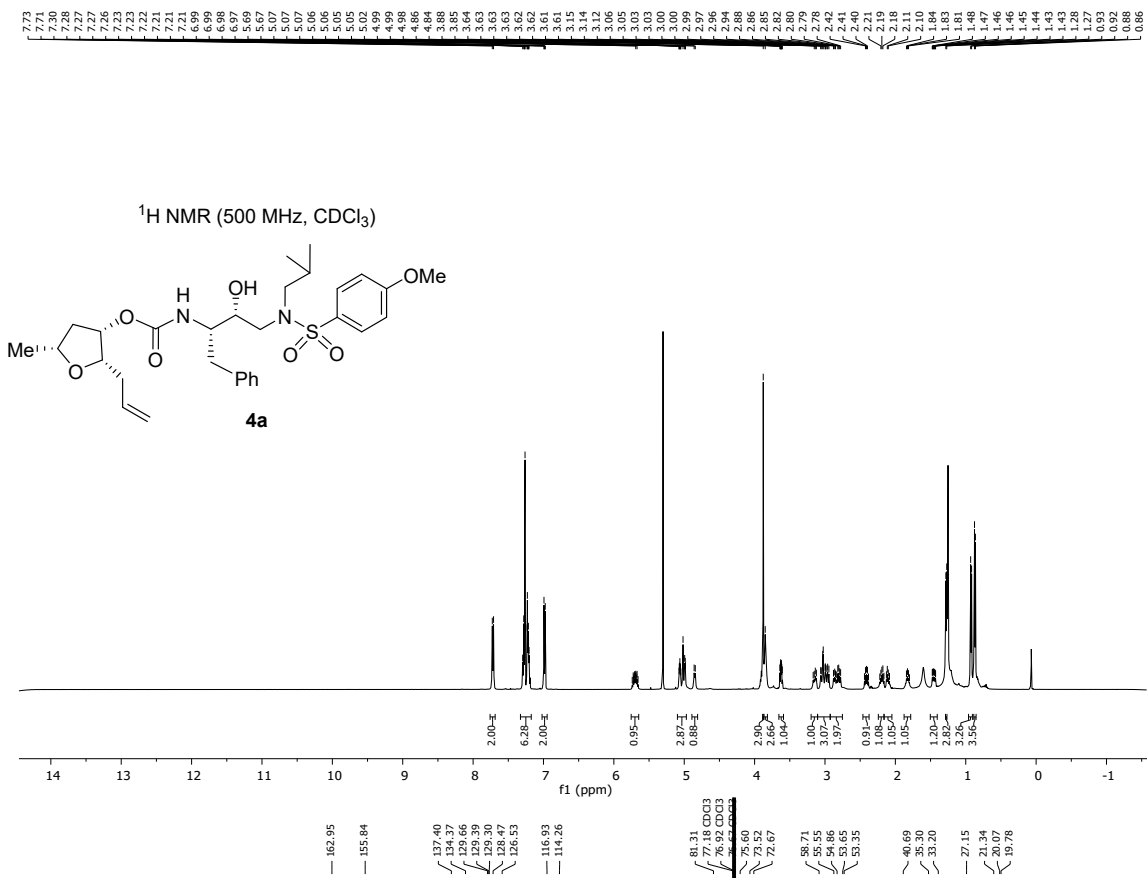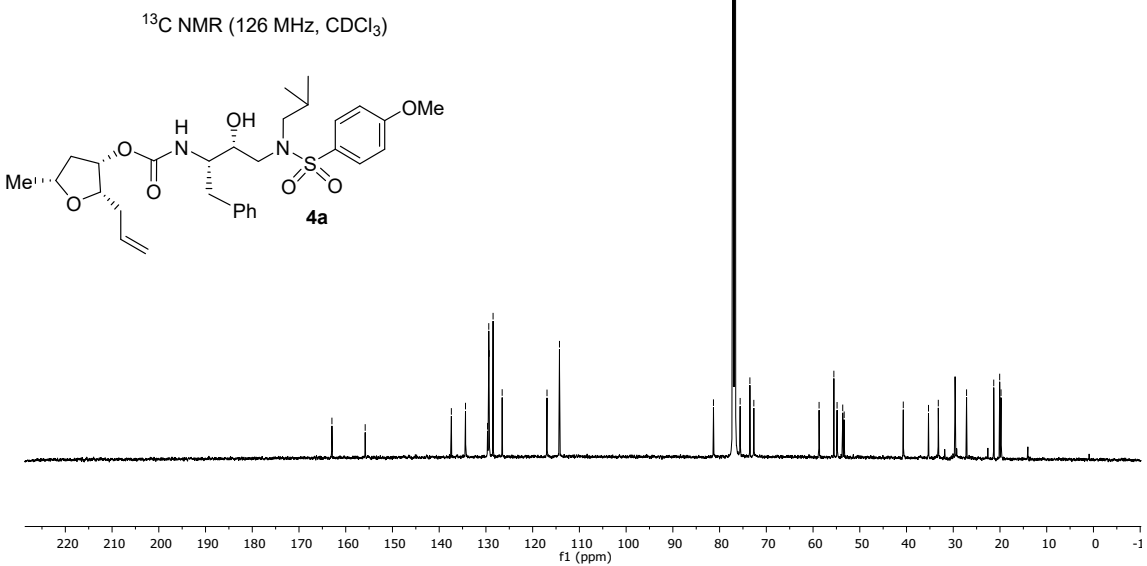

H1 standard parameters, CDC13, QNP probe.

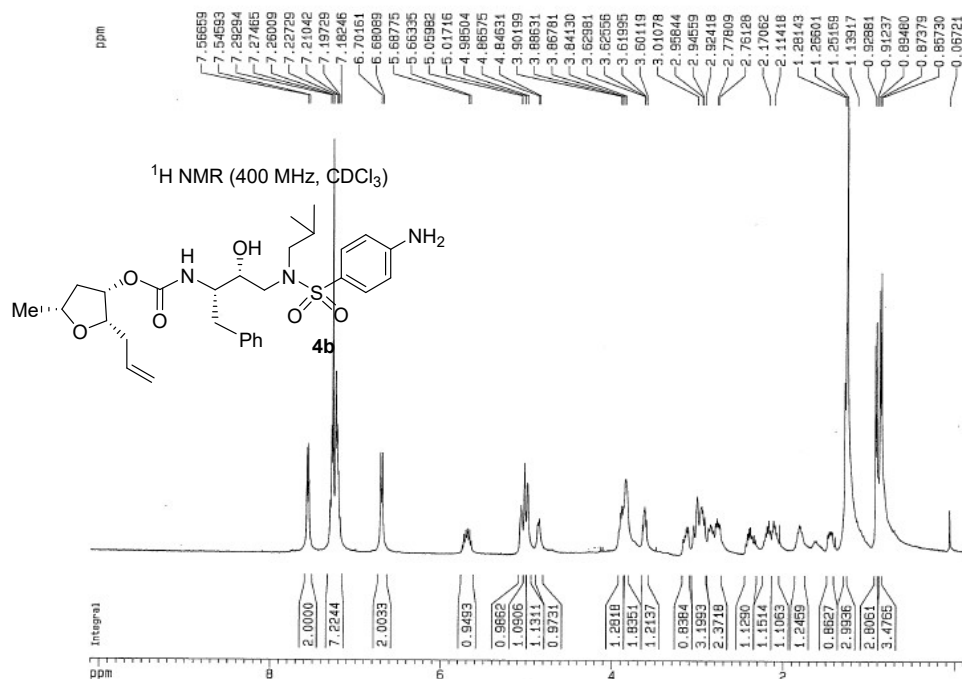

Current Data Parameters  
 NAME DL-1-173  
 EXPNO 1  
 PROCNO 1

F2 - Acquisition Parameters  
 Date\_ 20170603  
 Time 16:12  
 INSTRUM spect  
 PROBHD 5 mm QNP 1H  
 PULPROG zg30  
 TD 16384  
 SOLVENT CDC13  
 NS 14  
 DS 2  
 SMH 5617.978 Hz  
 FIDRES 0.342894 Hz  
 AQ 1.4582260 sec  
 RG 2660  
 DW 99.000 usec  
 DE 127.14 usec  
 TE 300.0 K  
 D1 2.0000000 sec  
 P1 9.50 usec  
 SFO1 400.1694000 MHz  
 NUCLEUS 1H

F2 - Processing parameters  
 SI 8192  
 SF 400.1699660 MHz  
 MDN EM  
 SGB 0  
 LB 0.30 Hz  
 GB 0  
 PC 1.00

1D NMR plot parameters  
 CX 20.00 cm  
 F1P 10.100 ppm  
 F1 4041.69 Hz  
 F2p -0.100 ppm  
 F2 -40.02 Hz  
 PRMCM 0.51000 ppm/cm  
 HZCM 204.06518 Hz/cm

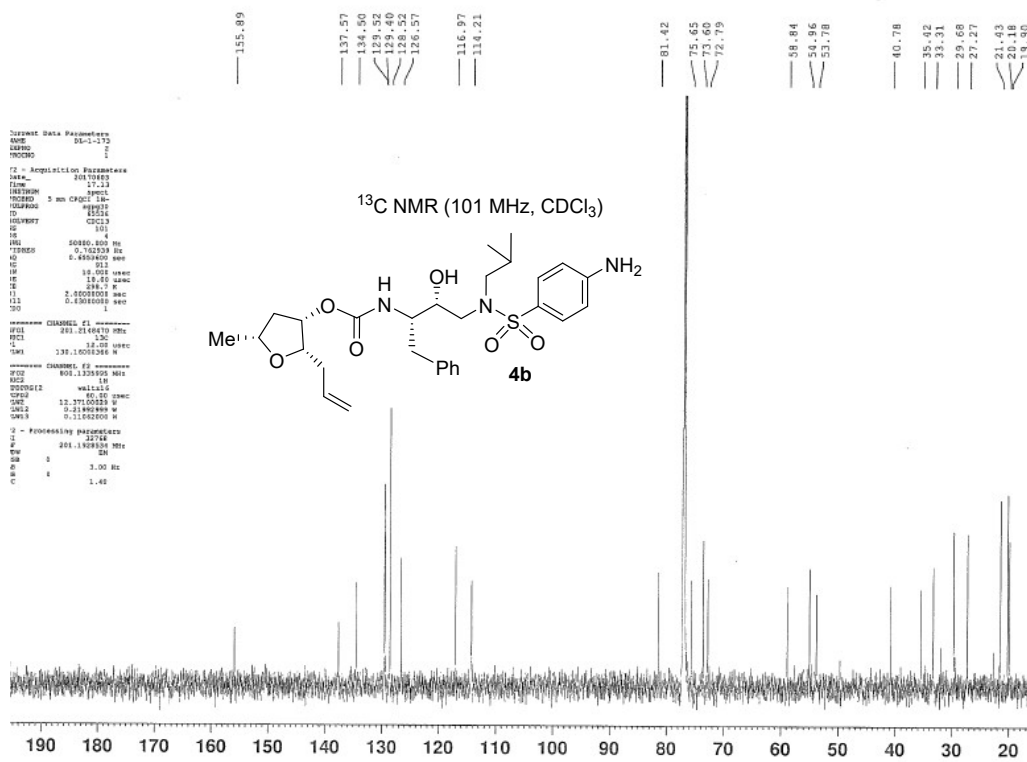

Current Data Parameters  
 NAME DL-1-173  
 EXPNO 1  
 PROCNO 1

F2 - Acquisition Parameters  
 Date\_ 20170603  
 Time 17:13  
 INSTRUM spect  
 PROBHD 5 mm QNP 13C  
 PULPROG zgpg30  
 TD 65536  
 SOLVENT CDCl3  
 NS 101  
 DS 4  
 SWH 50850.800 MHz  
 F2 101.62538 MHz  
 AQ 0.4904000 sec  
 RG 312  
 DE 18.000 usec  
 TE 300.0 K  
 D1 2.5000000 sec  
 SFO1 101.62538 MHz

===== CHANNEL f1 =====  
 NU1 201.2146100 MHz  
 PC1 1.00  
 L 12.00 usec  
 SW1 537.1008286 MHz

===== CHANNEL f2 =====  
 NU2 101.62538 MHz  
 PC2 1.00  
 L 12.00 usec  
 SW2 101.62538 MHz  
 SWH 101.62538 MHz

F2 - Processing parameters  
 L 1  
 F 201.2146100 MHz  
 SW 101.62538 MHz  
 DS 4  
 C 1.40



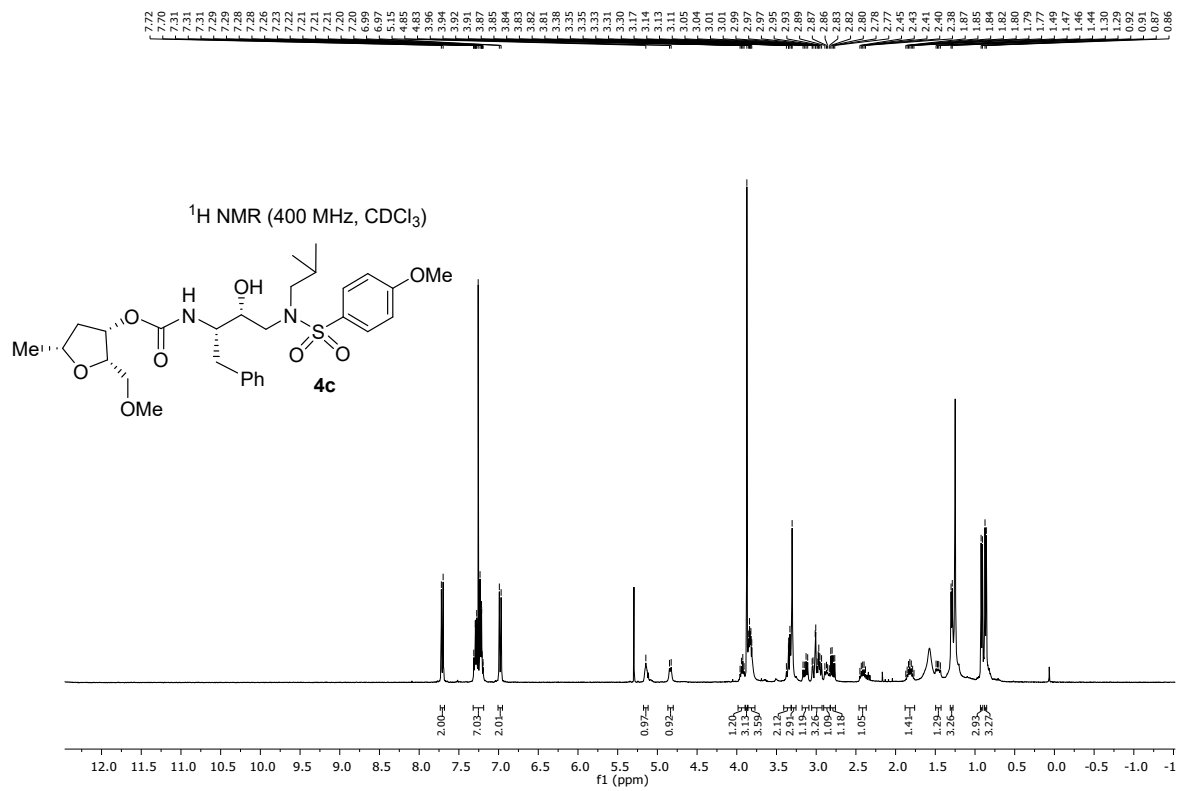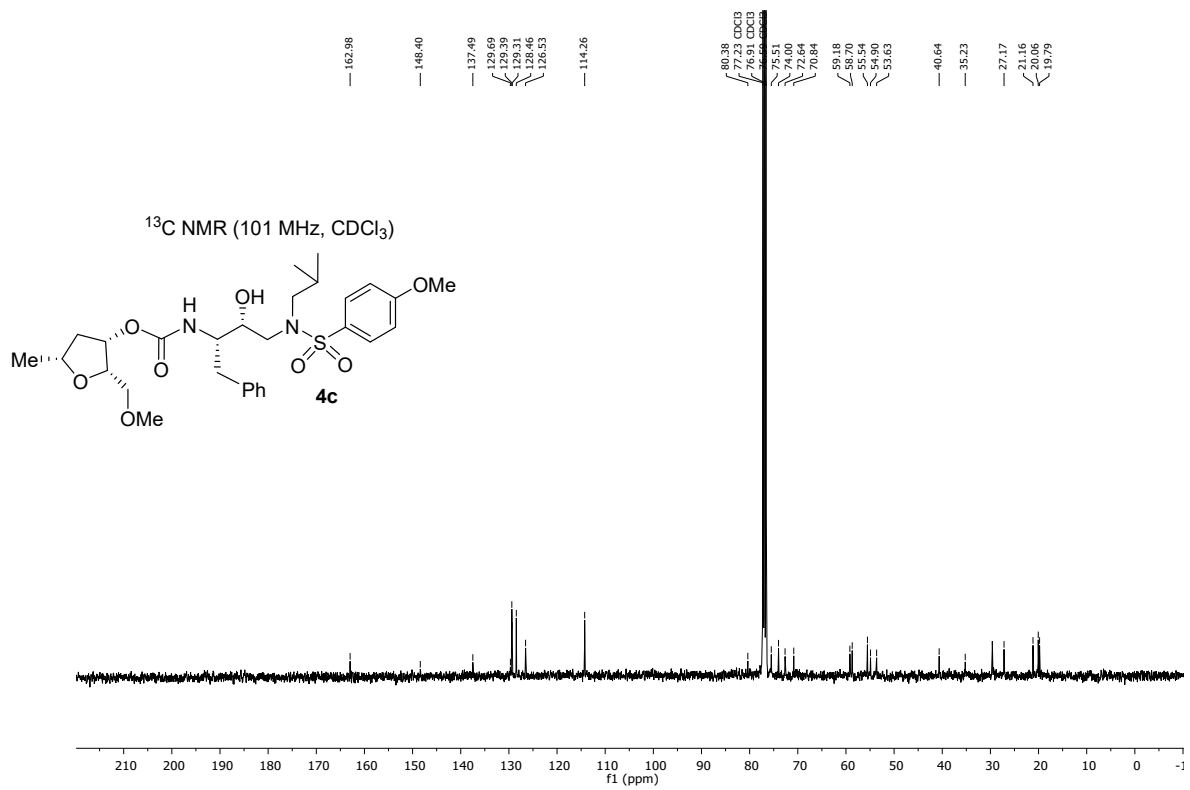

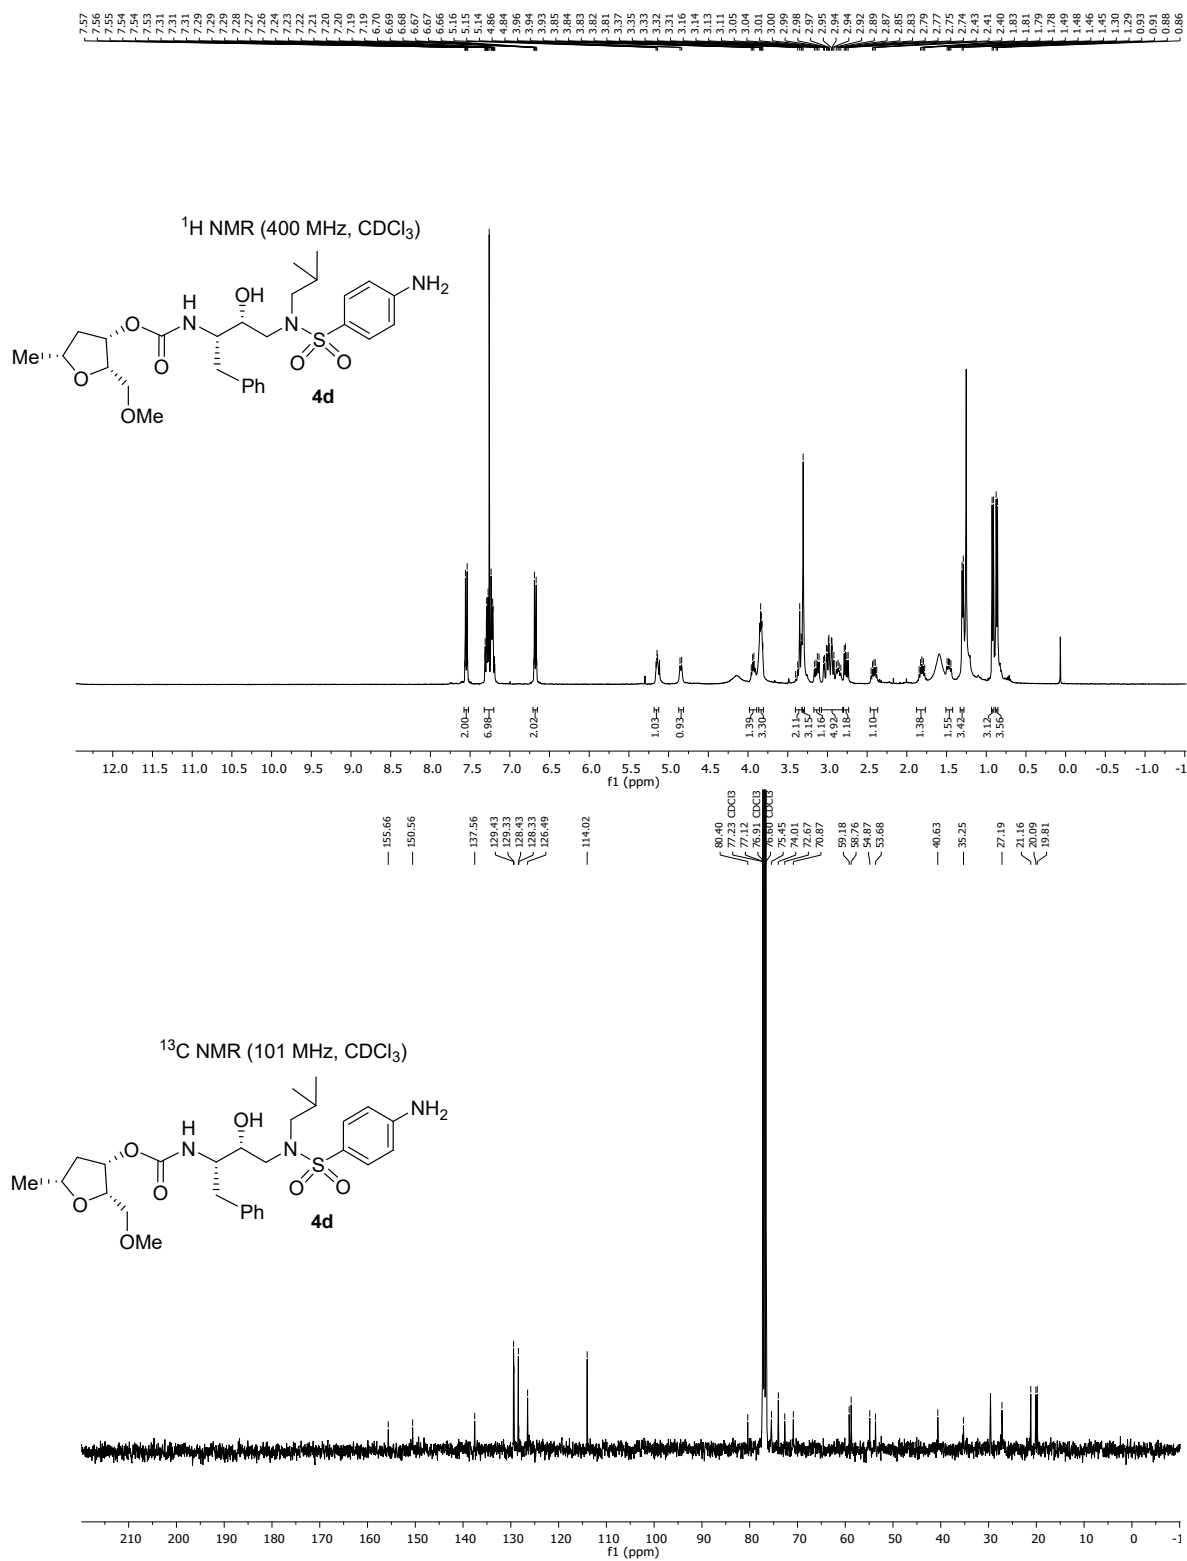

7.72  
7.70  
7.29  
7.28  
7.26  
7.23  
7.22  
7.00  
6.99  
6.98  
6.97  
6.96  
5.08  
5.07  
5.07  
4.84  
3.96  
3.95  
3.94  
3.94  
3.91  
3.88  
3.86  
3.84  
3.84  
3.81  
3.78  
3.78  
3.51  
3.51  
3.34  
3.34  
3.15  
3.13  
3.12  
3.12  
3.05  
3.04  
3.02  
3.01  
3.00  
2.99  
2.98  
2.97  
2.95  
2.87  
2.85  
2.85  
2.83  
2.82  
2.80  
2.80  
2.78  
2.78  
2.36  
2.35  
2.33  
2.33  
1.83  
1.82  
1.81  
1.80  
1.30  
1.30  
0.93  
0.92  
0.87  
0.87

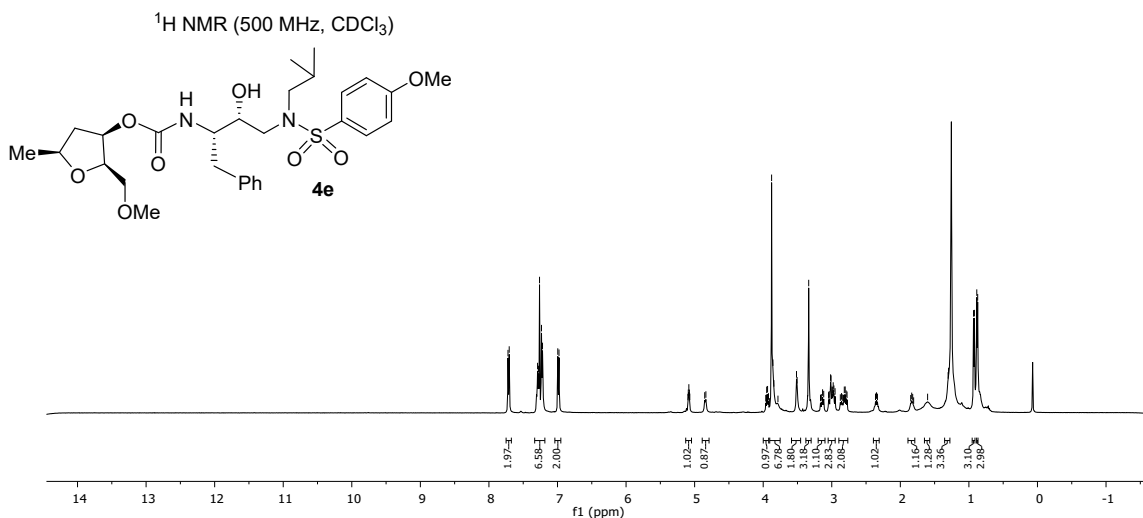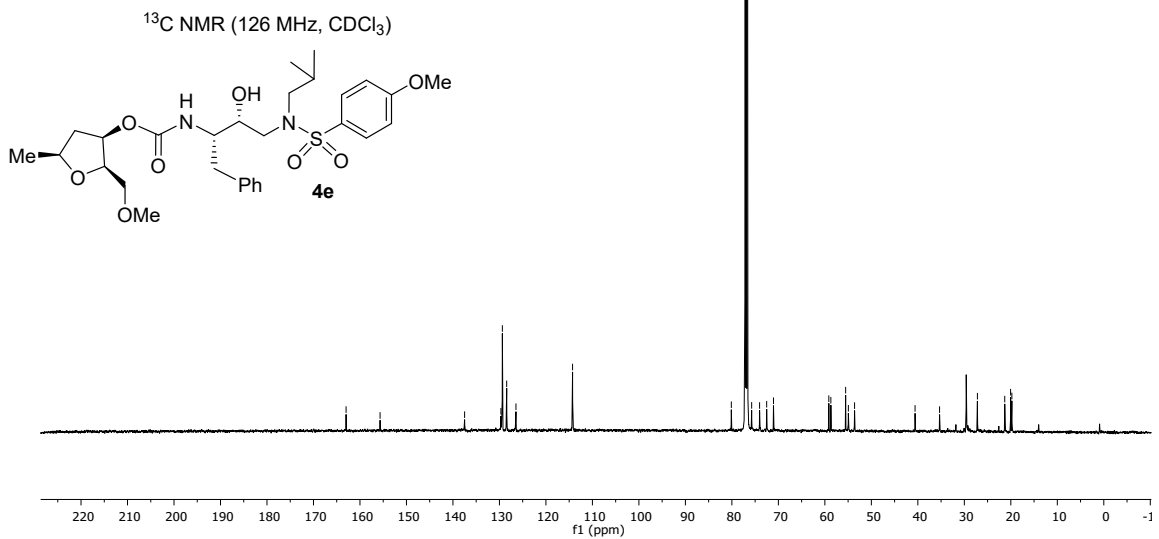

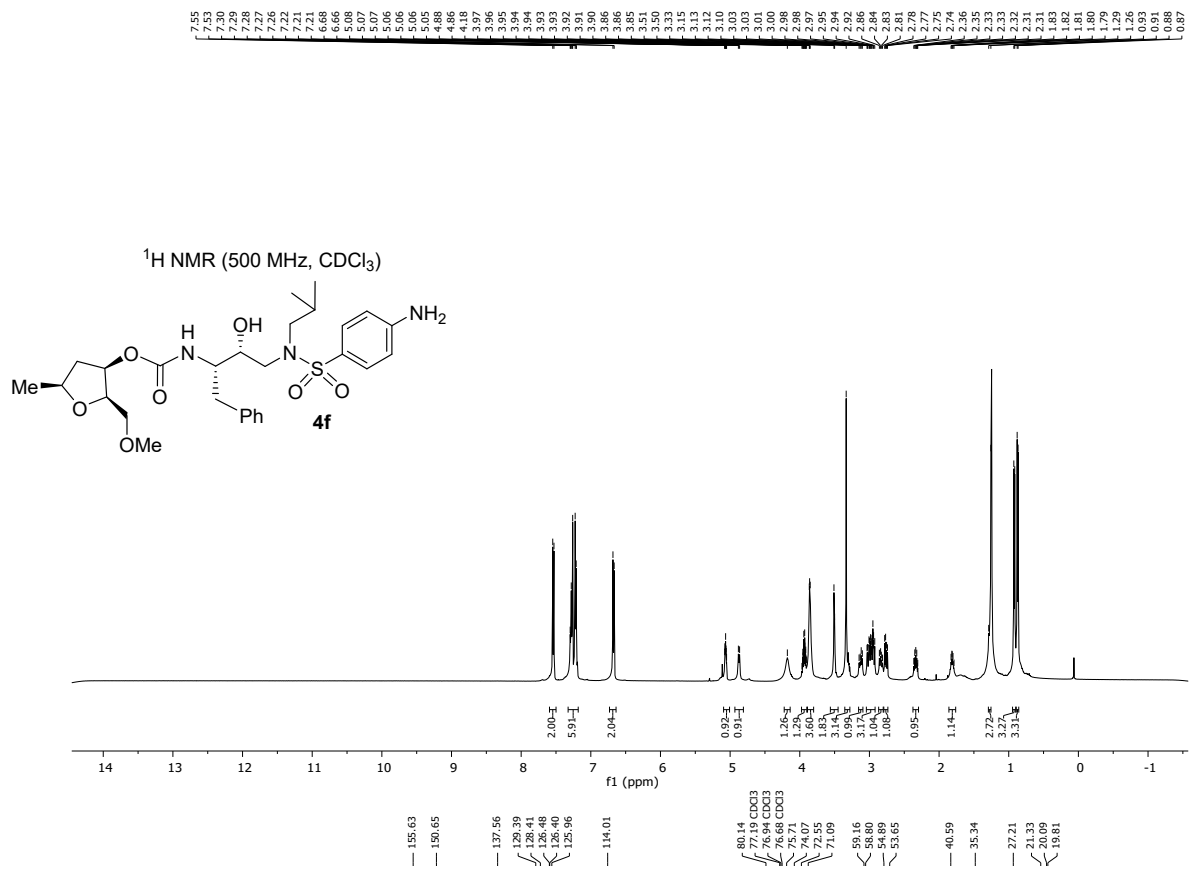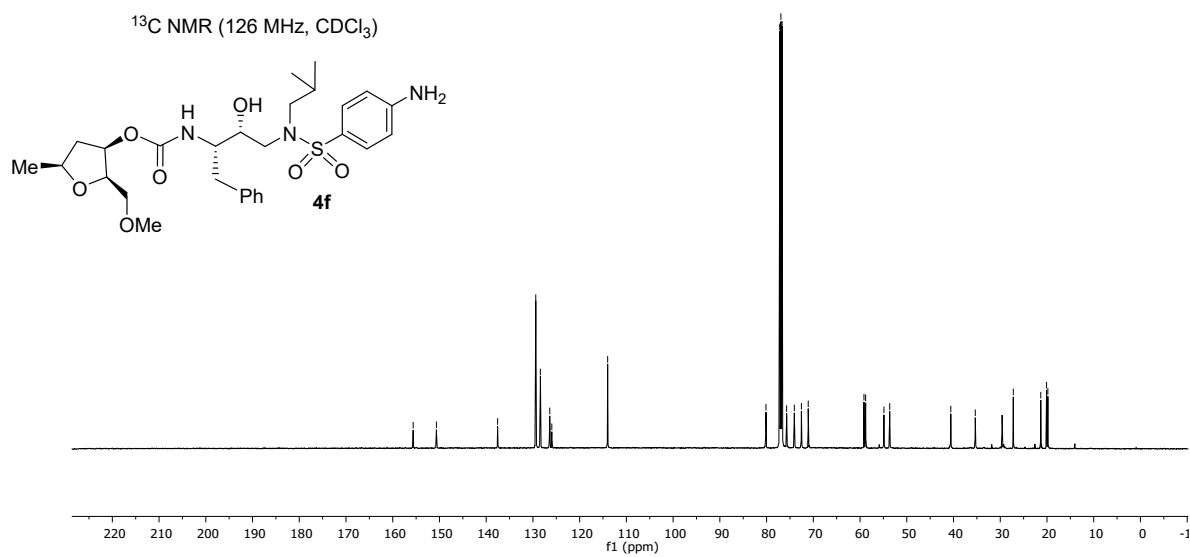

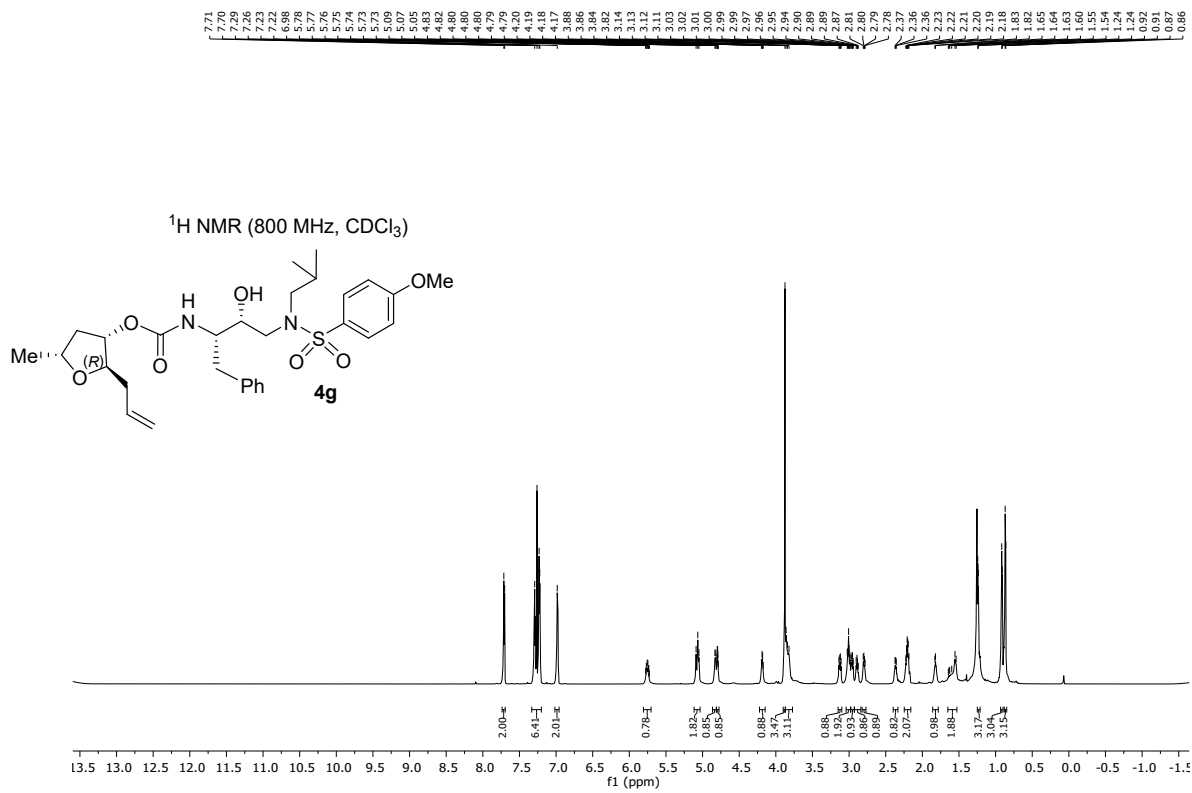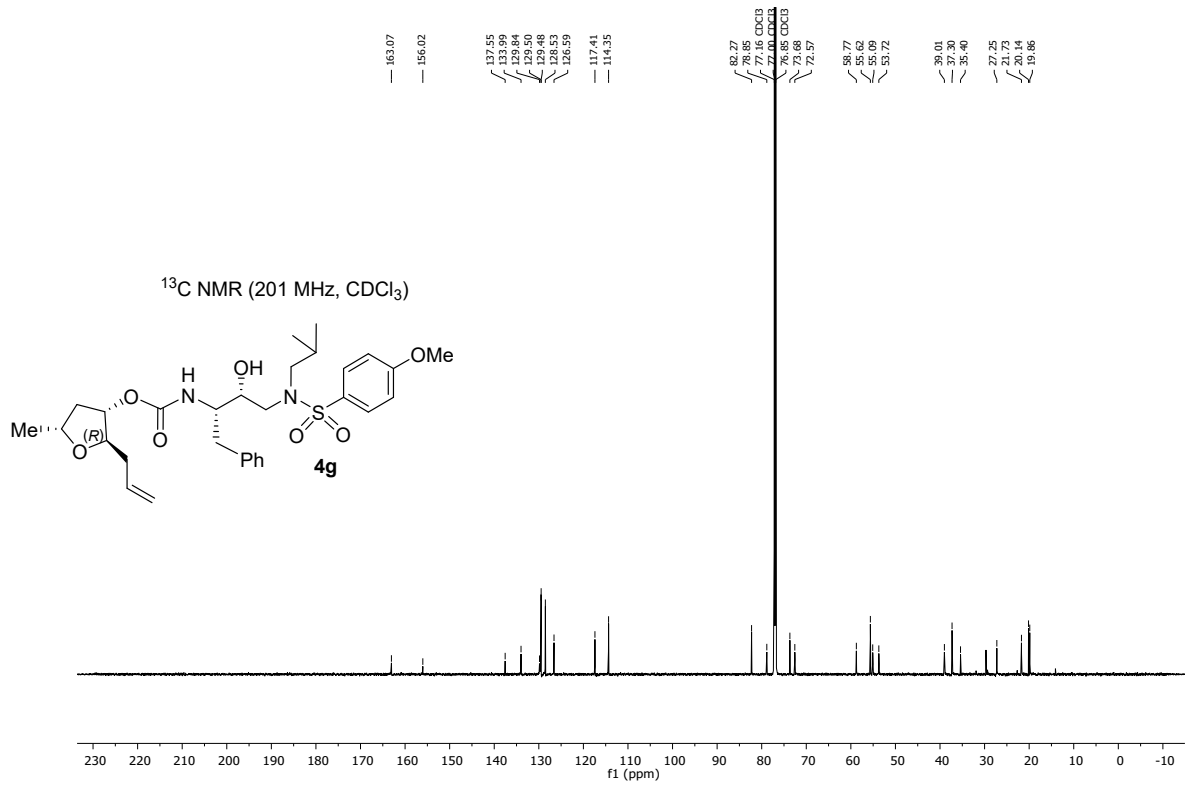

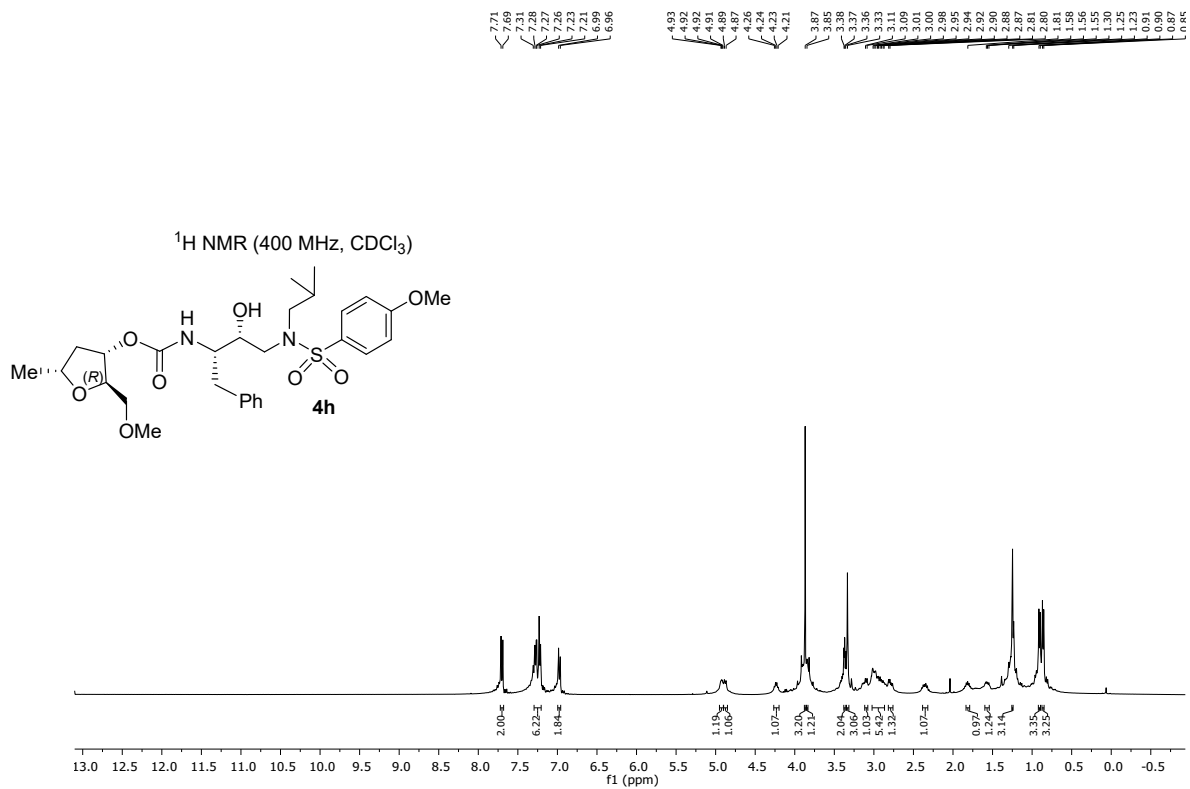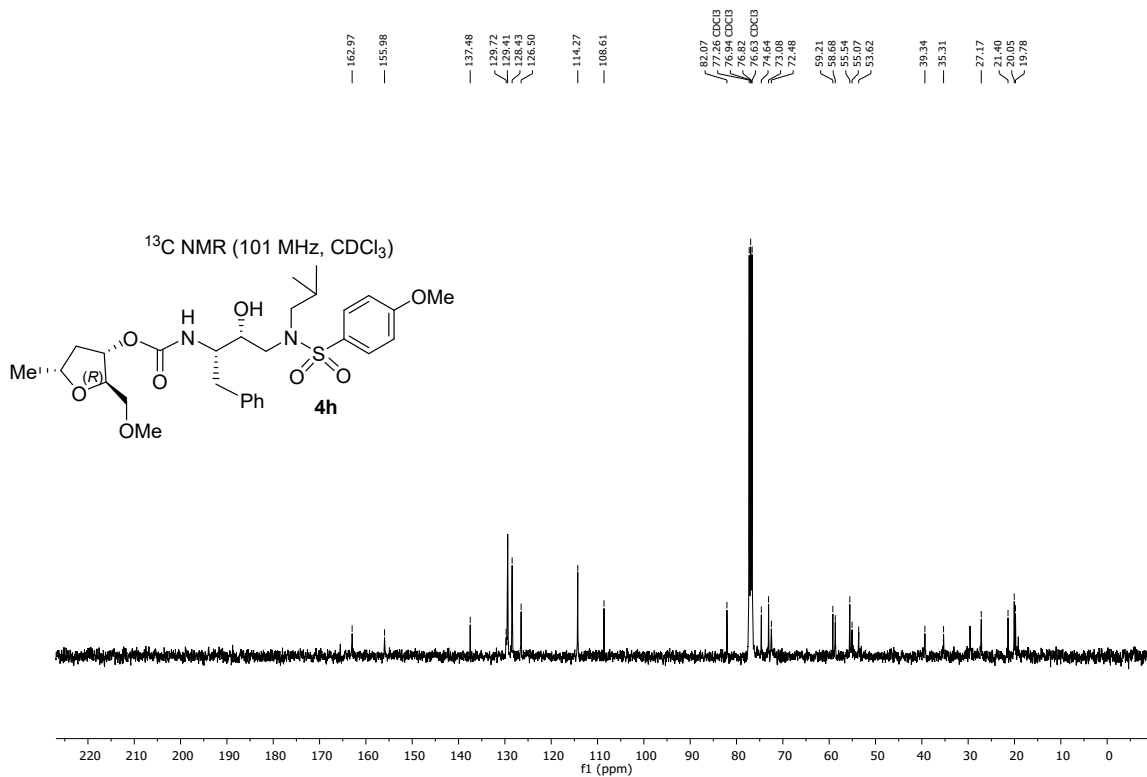

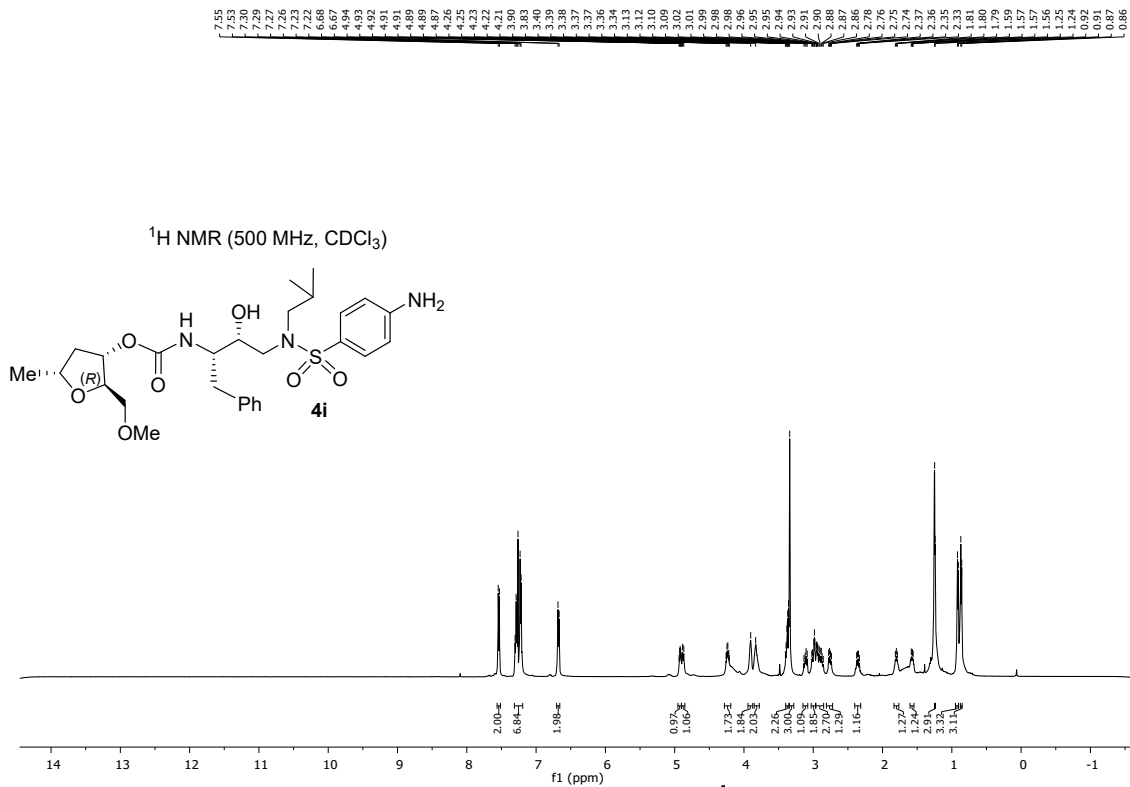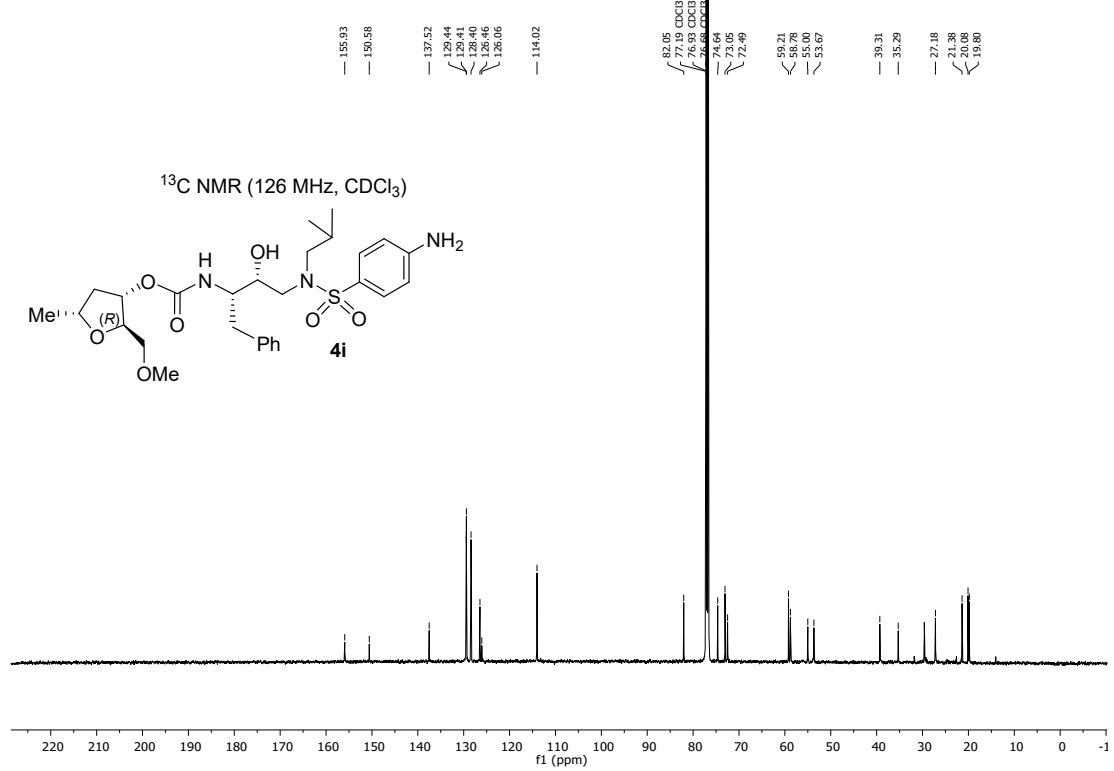

H1 standard parameters, CDC13, QNP probe.

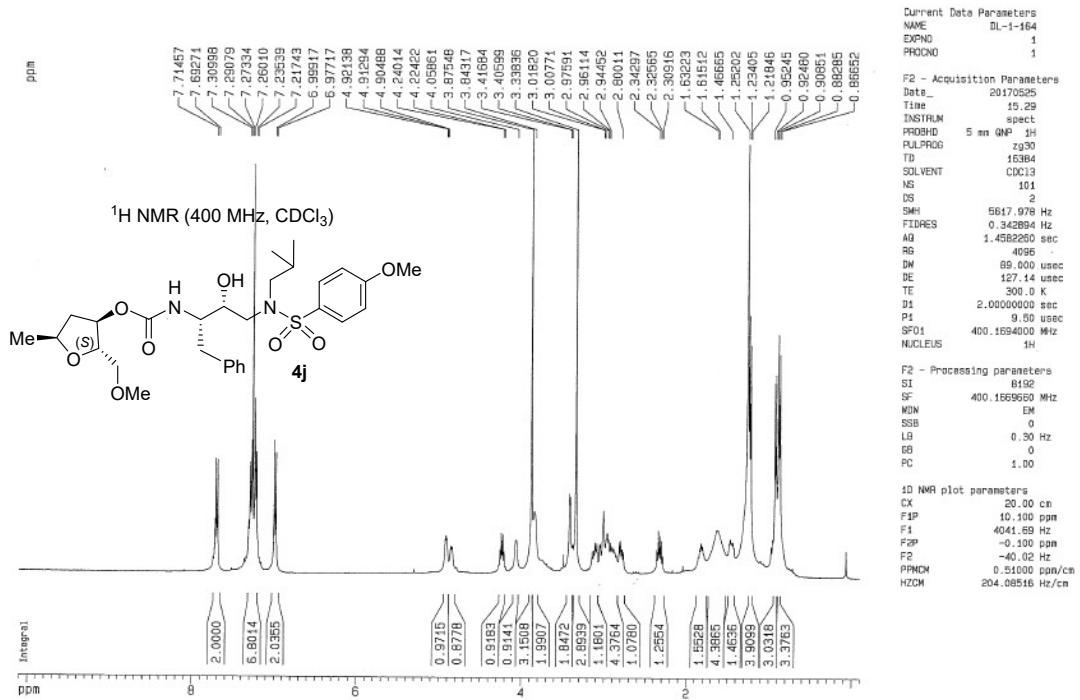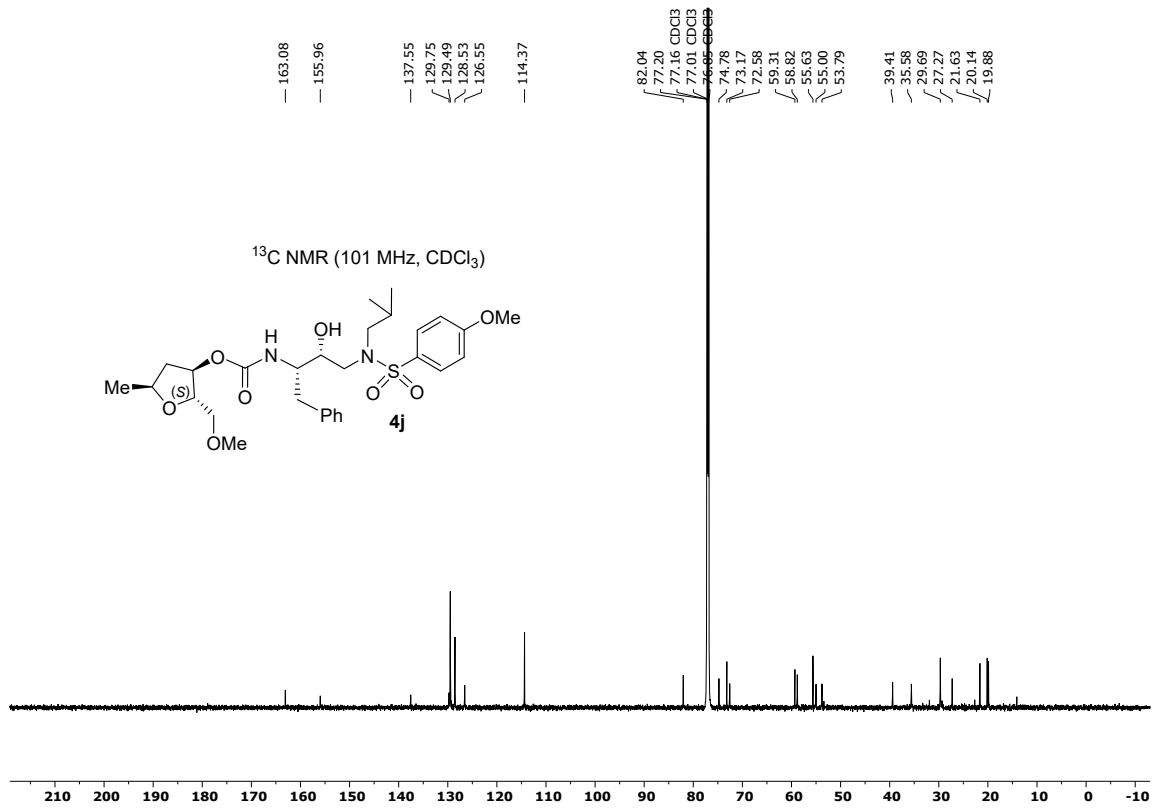



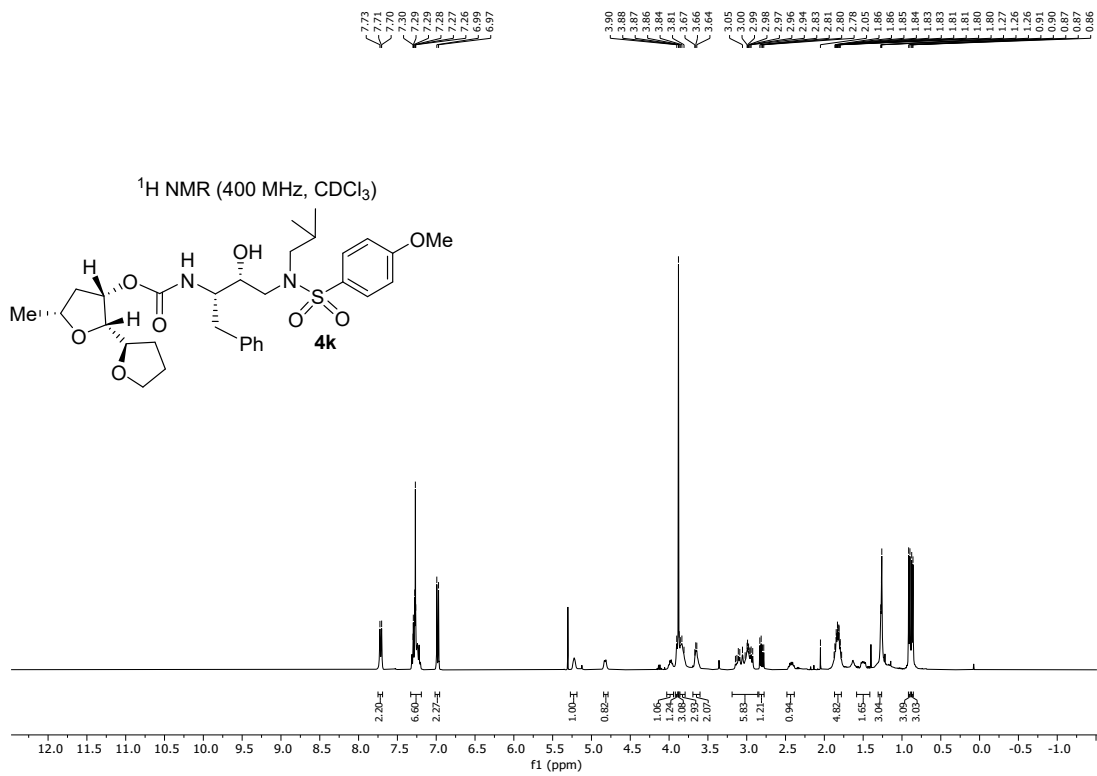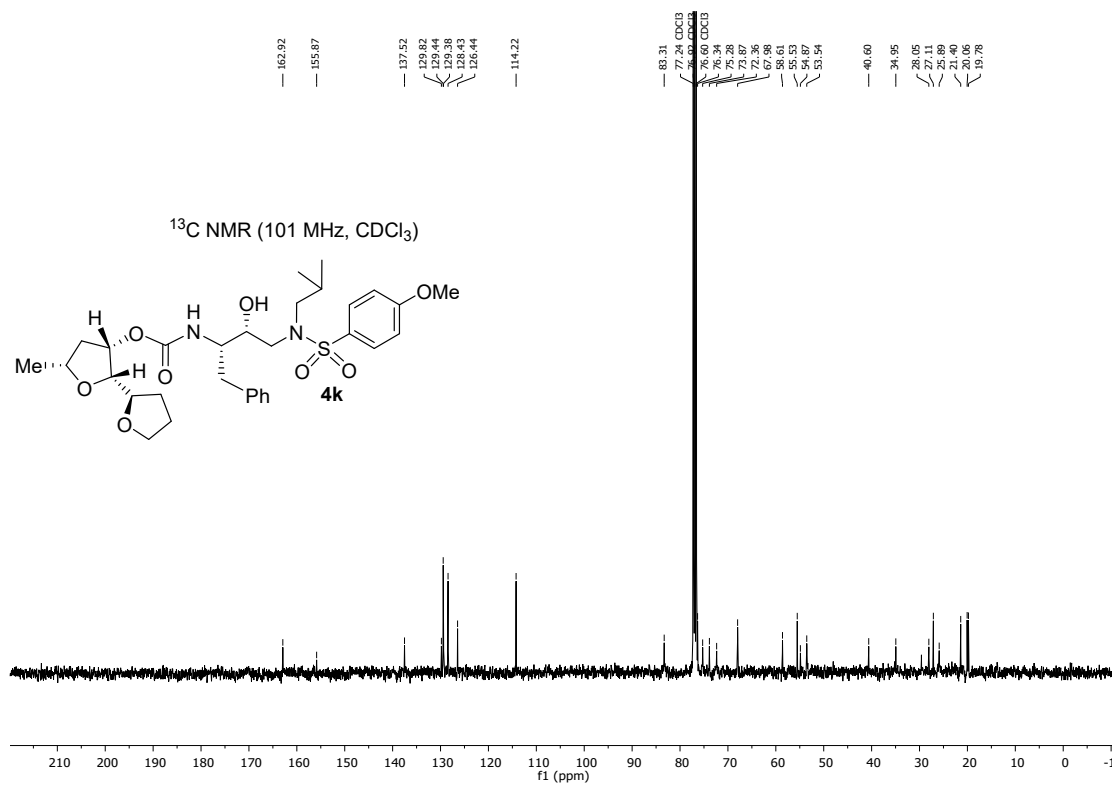

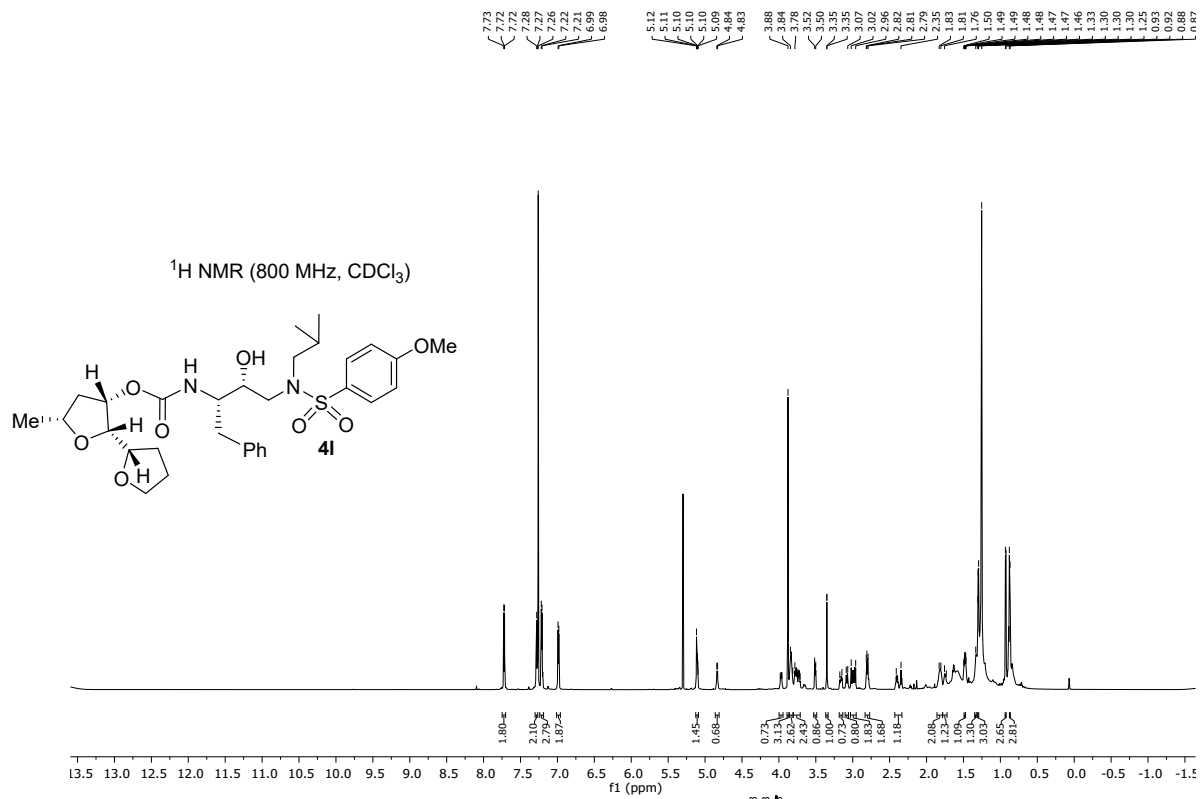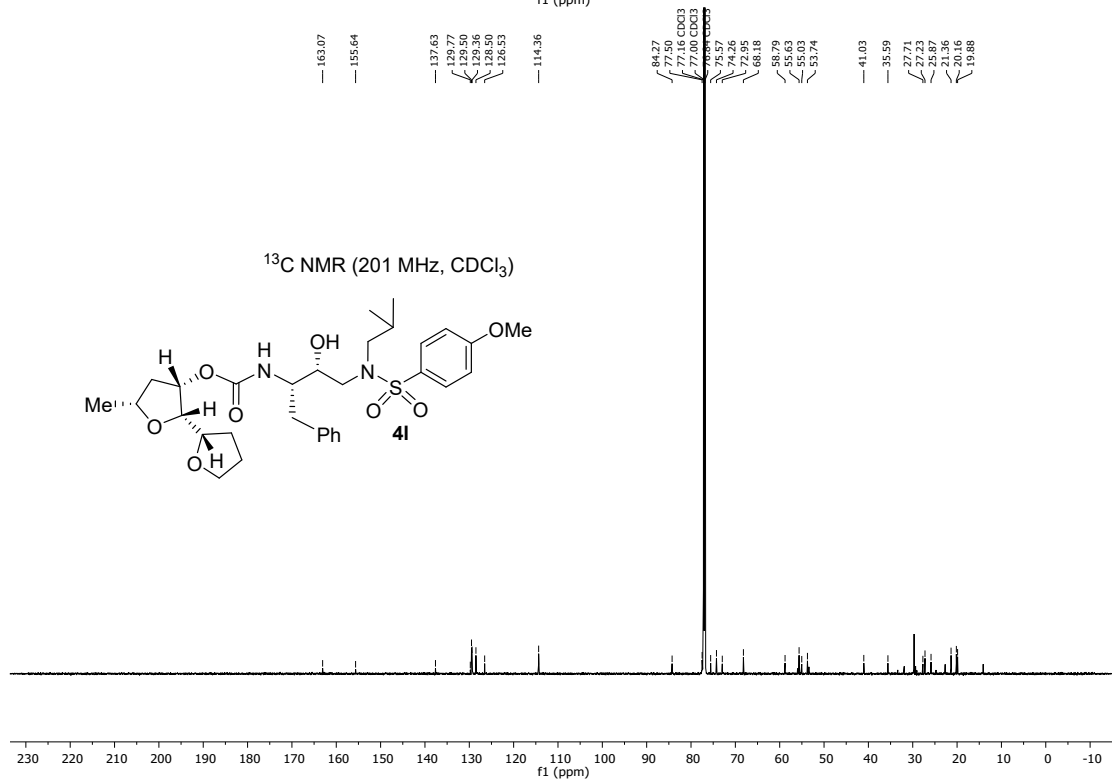

RIC-AS-12455\_ESI+\_ACN+H2O\_DL-01-114-8 #1-36 RT: 0.00-0.50 AV: 36 NL: 3.37E5  
T: FTMS + p ESI Full ms [100.00-800.00]

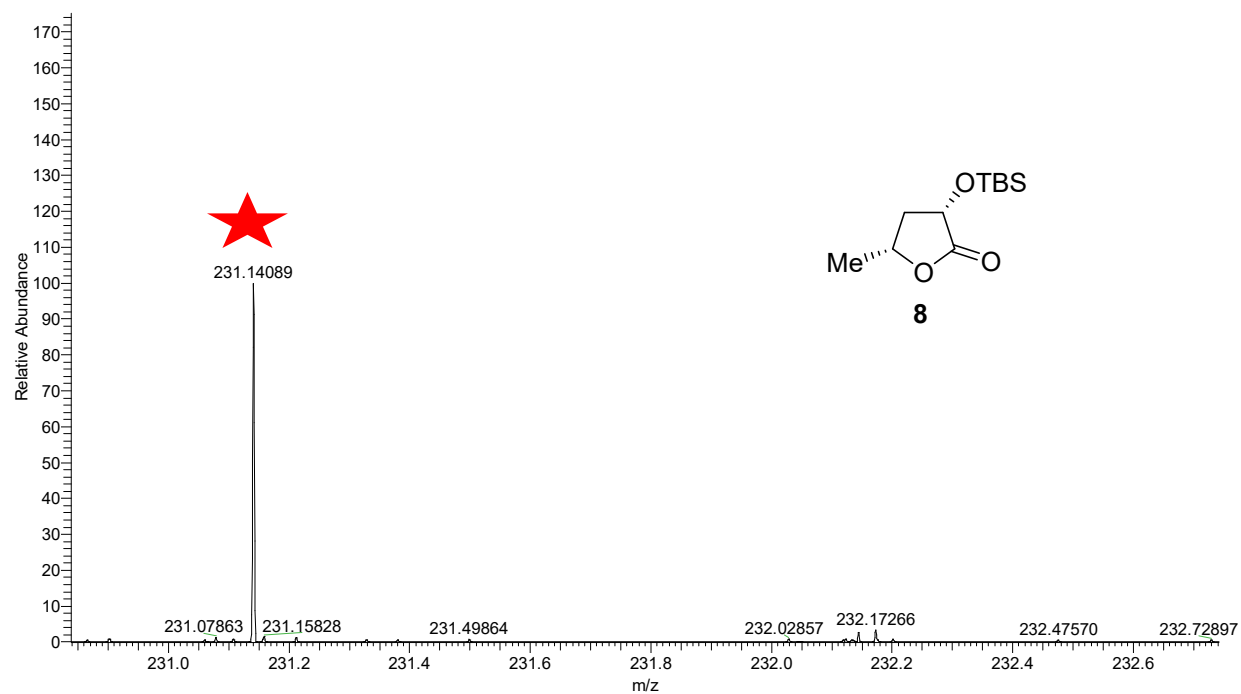

RIC-AS-12464\_APCI+\_ASH-OBC-ENT-8 #1-30 RT: 0.01-0.45 AV: 30 NL: 1.01E6  
T: FTMS + p APCI corona Full ms [100.00-500.00]

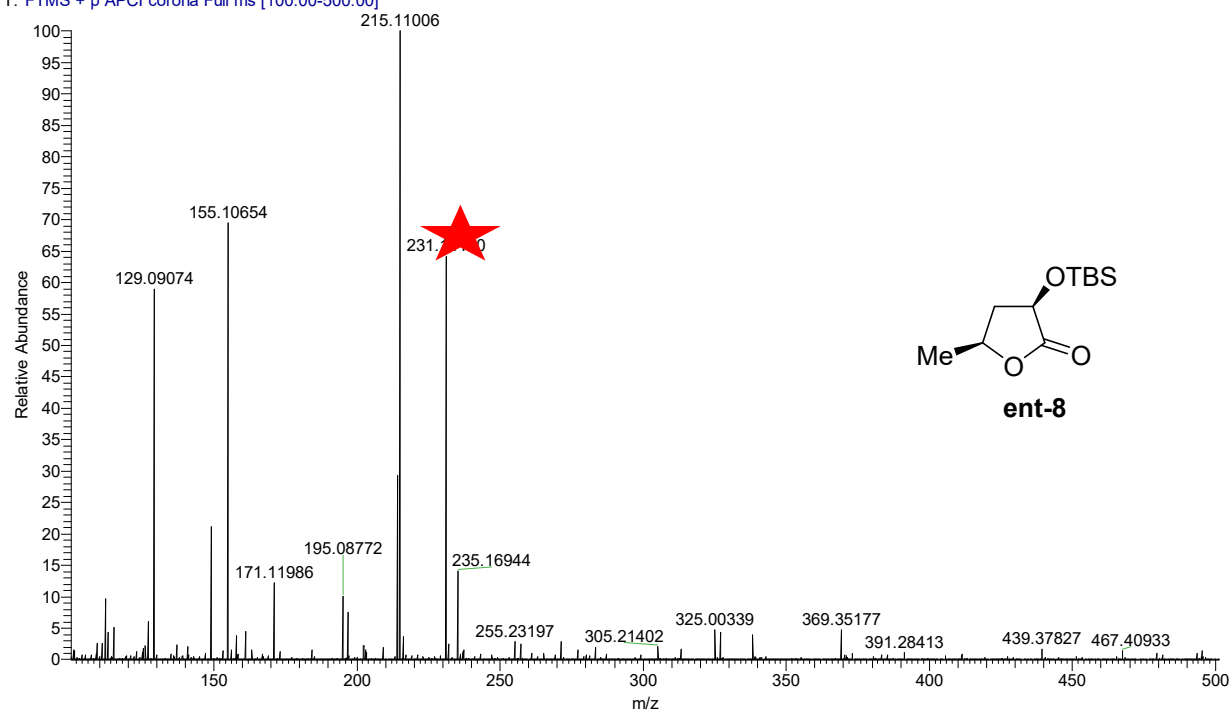

RIC-AS-12455\_APCI+\_ACN+H2O\_ASH-OBC-9 #1-35 RT: 0.00-0.50 AV: 35 NL: 8.98E6  
T: FTMS + p APCI corona Full ms [100.00-800.00]

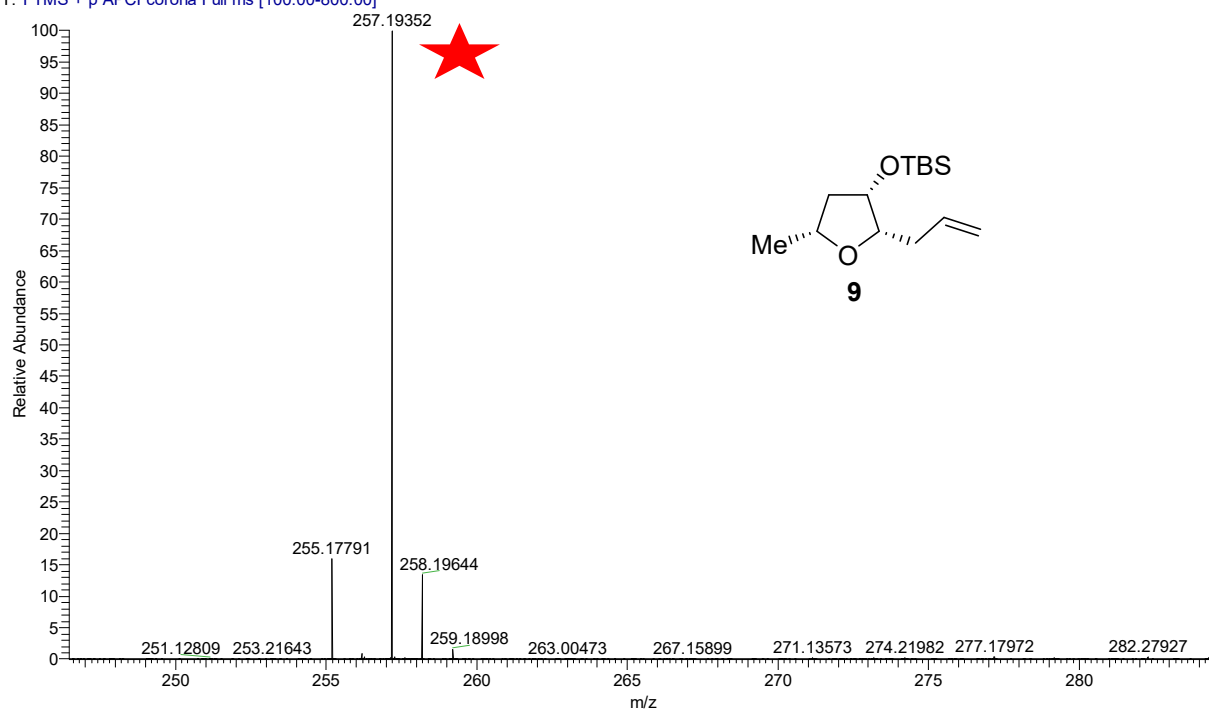

RIC-AS-12472\_APCI+\_MeOH\_ASH-OBC-ent-9 #1-30 RT: 0.00-0.44 AV: 30 NL: 3.82E5  
T: FTMS + p APCI corona Full ms [100.00-500.00]

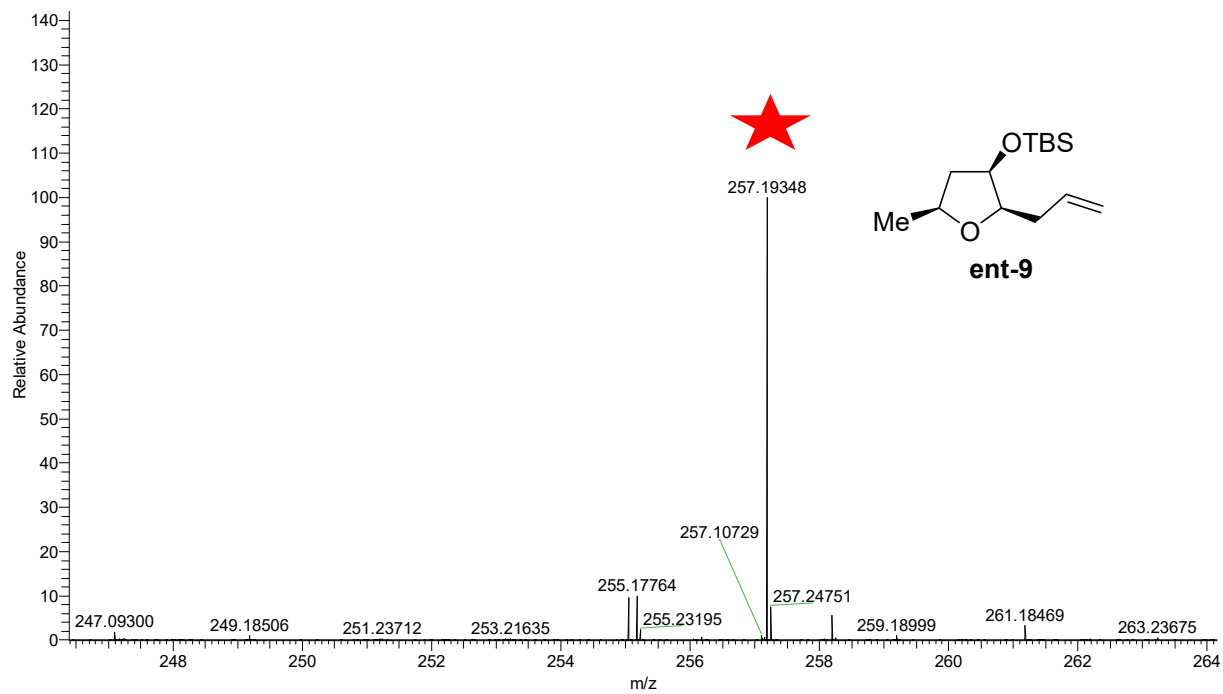

RIC-AS-12455\_ESI+\_ACN+H2O\_DL-01-125-10 #1-36 RT: 0.00-0.50 AV: 36 NL: 7.71E6  
T: FTMS + p ESI Full ms [100.00-800.00]

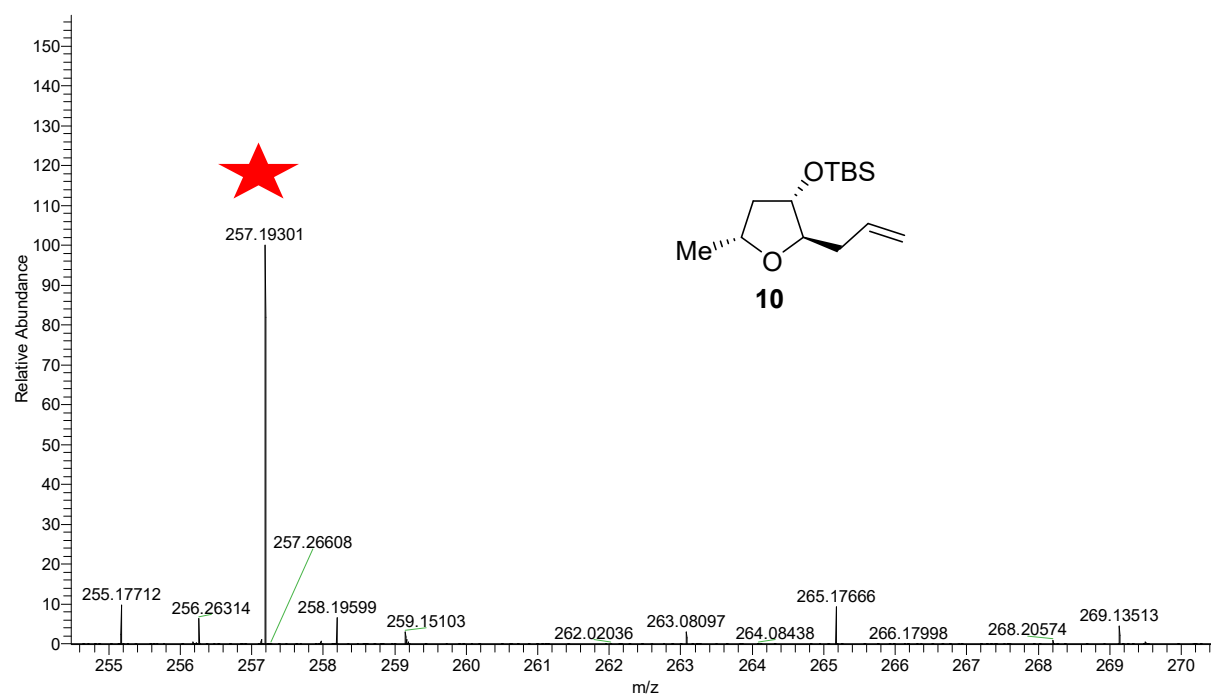

RIC-AS-12472\_APCI+\_MeOH\_ASH-OBC-ent-10 #1-30 RT: 0.01-0.43 AV: 30 NL: 6.21E6  
T: FTMS + p APCI corona Full ms [100.00-500.00]

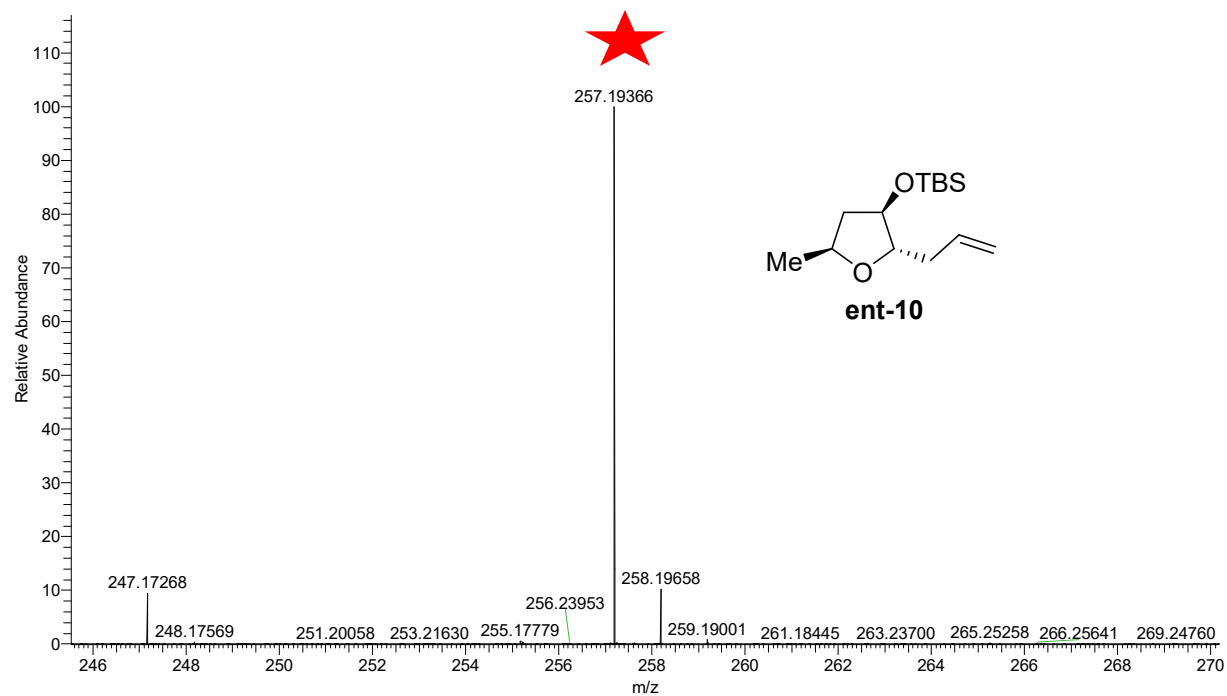

RIC-AS-12464\_APCI+\_ASH-OBC-11 #1-30 RT: 0.01-0.45 AV: 30 NL: 2.85E4  
T: FTMS + p APCI corona Full ms [105.00-195.00]

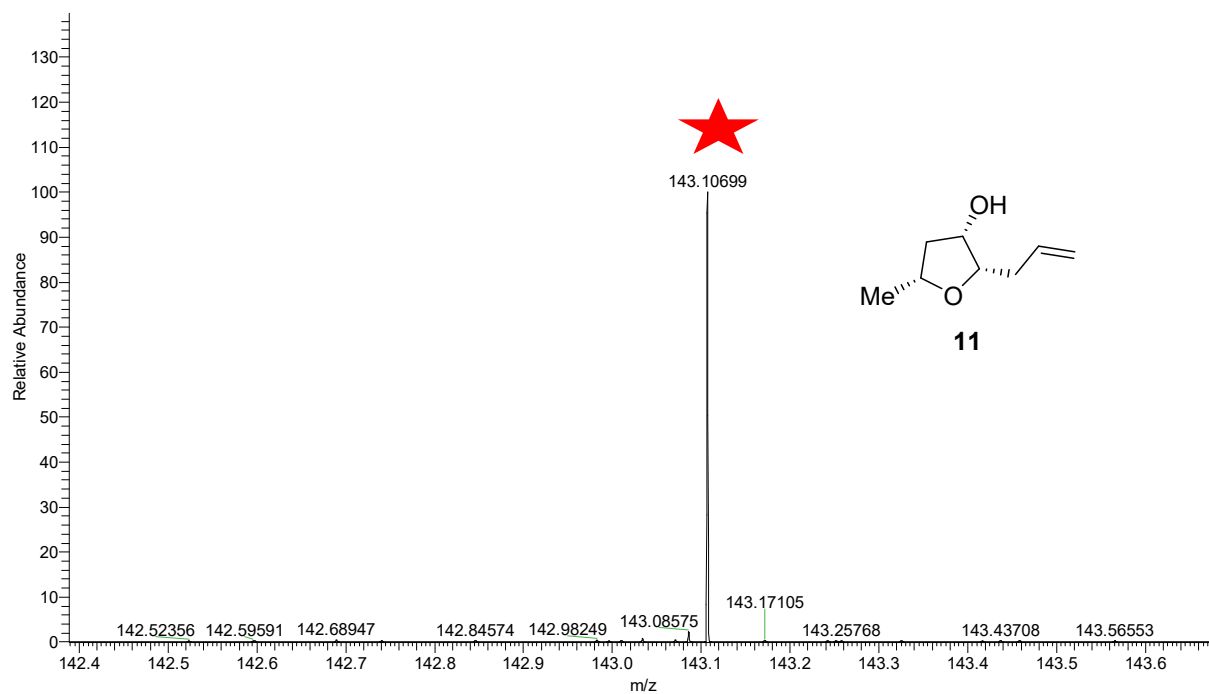

RIC-AS-12464\_APCI+\_ASH-OBC-ent-11 #1-30 RT: 0.01-0.44 AV: 30 NL: 6.21E5  
T: FTMS + p APCI corona Full ms [105.00-195.00]

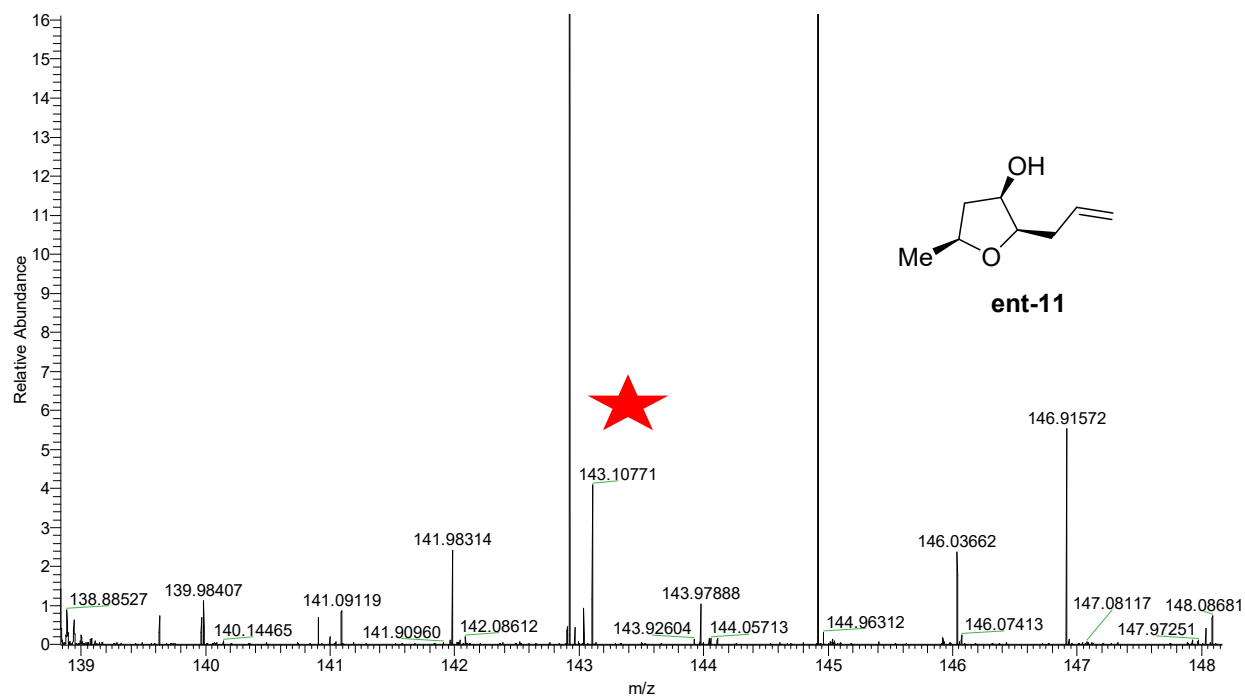

RIC-AS-12455\_APCI+\_ACN+H2O\_DL-01-123-12 #1-35 RT: 0.01-0.49 AV: 35 NL: 1.14E5  
T: FTMS + p APCI corona Full ms [100.00-800.00]

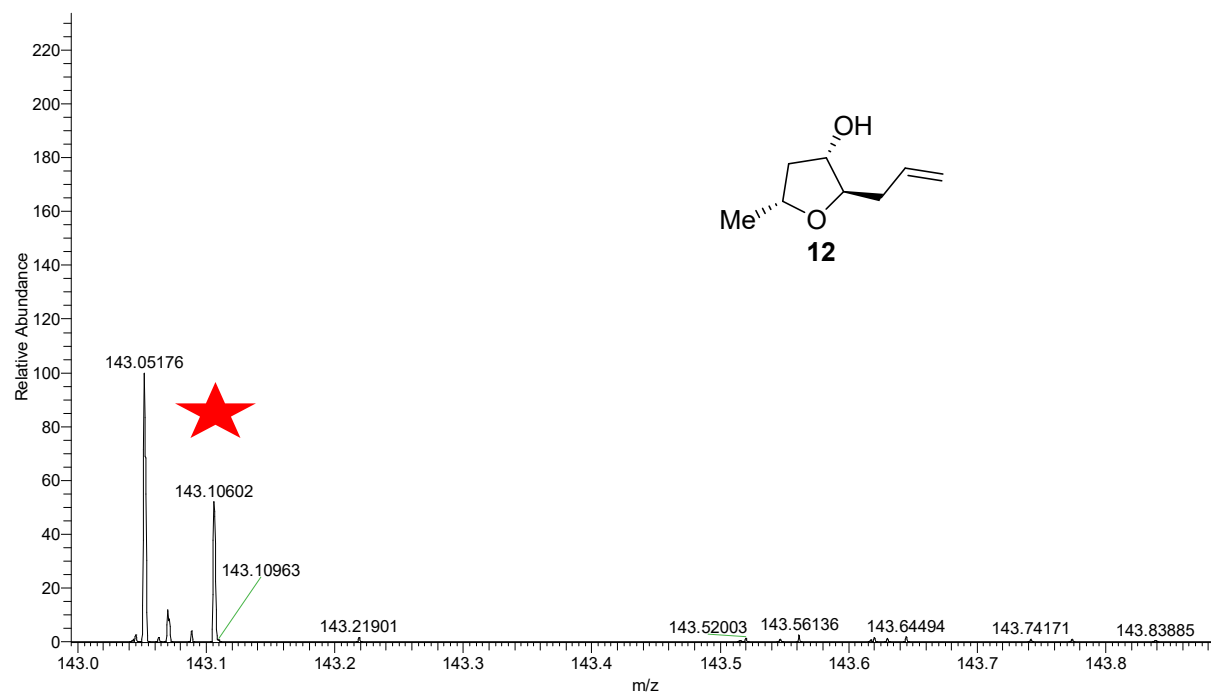

RIC-AS-12455\_APCI+\_ACN+H2O\_ASH-OBC-13 #1-34 RT: 0.01-0.49 AV: 34 NL: 2.40E7  
T: FTMS + p APCI corona Full ms [100.00-800.00]

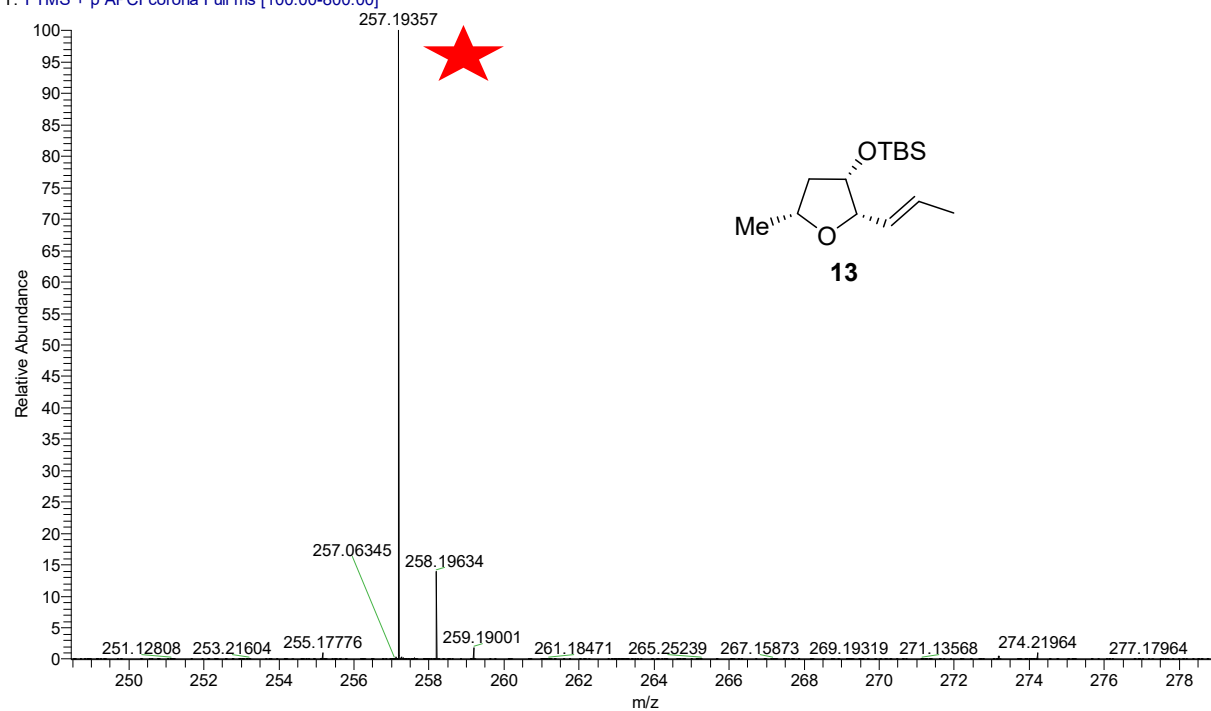

RIC-AS-12464\_APCI+\_ASH-OBC-14 #1-30 RT: 0.01-0.42 AV: 30 NL: 5.51E7  
T: FTMS + p APCI corona Full ms [105.00-400.00]

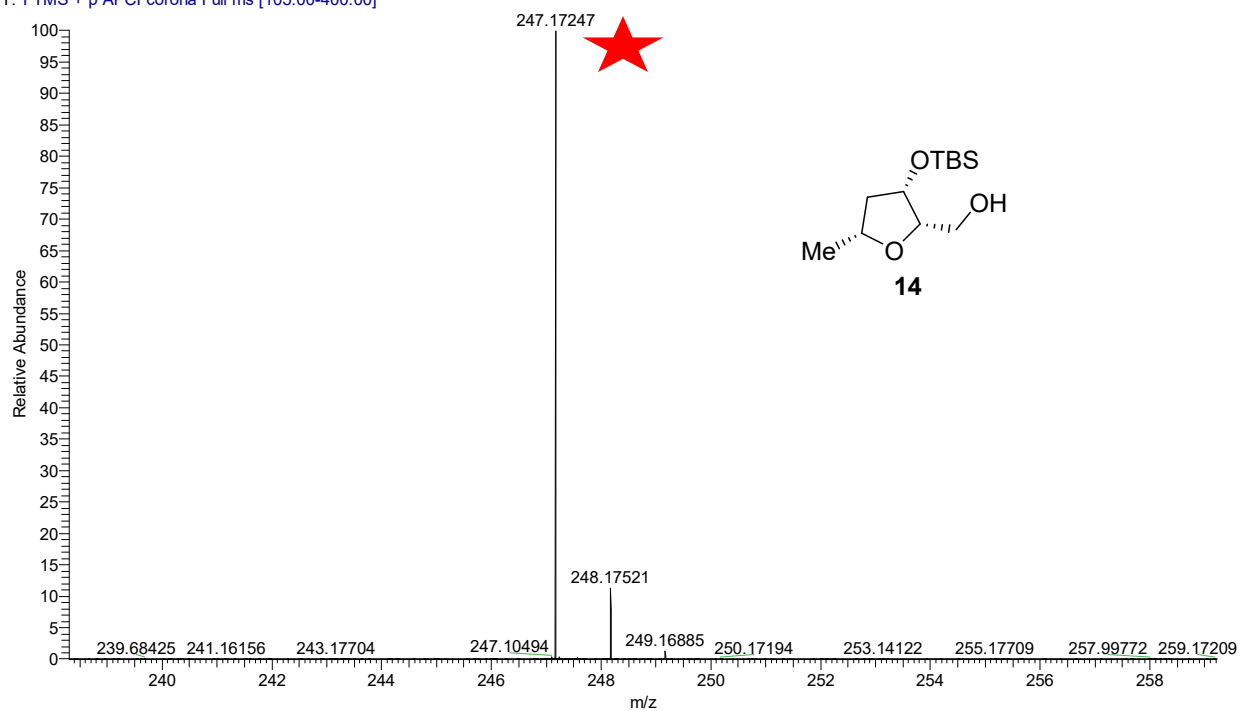

RIC-AS-12464\_APCI+\_ASH-OBC-15r #1-30 RT: 0.01-0.43 AV: 30 NL: 4.57E5  
T: FTMS + p APCI corona Full ms [100.00-340.00]

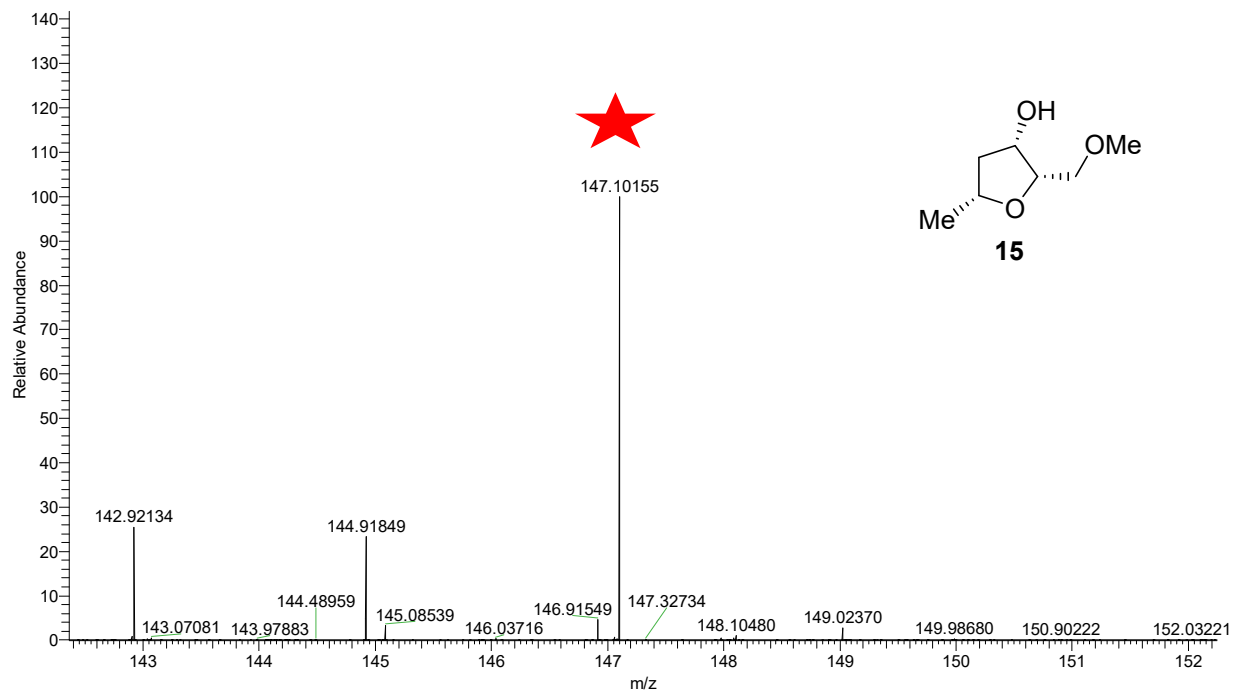



RIC-AS-12472\_APCI+\_MeOH\_ASH-OBC-ent-15 #1-30 RT: 0.00-0.44 AV: 30 NL: 5.36E5  
T: FTMS + p APCI corona Full ms [100.00-500.00]

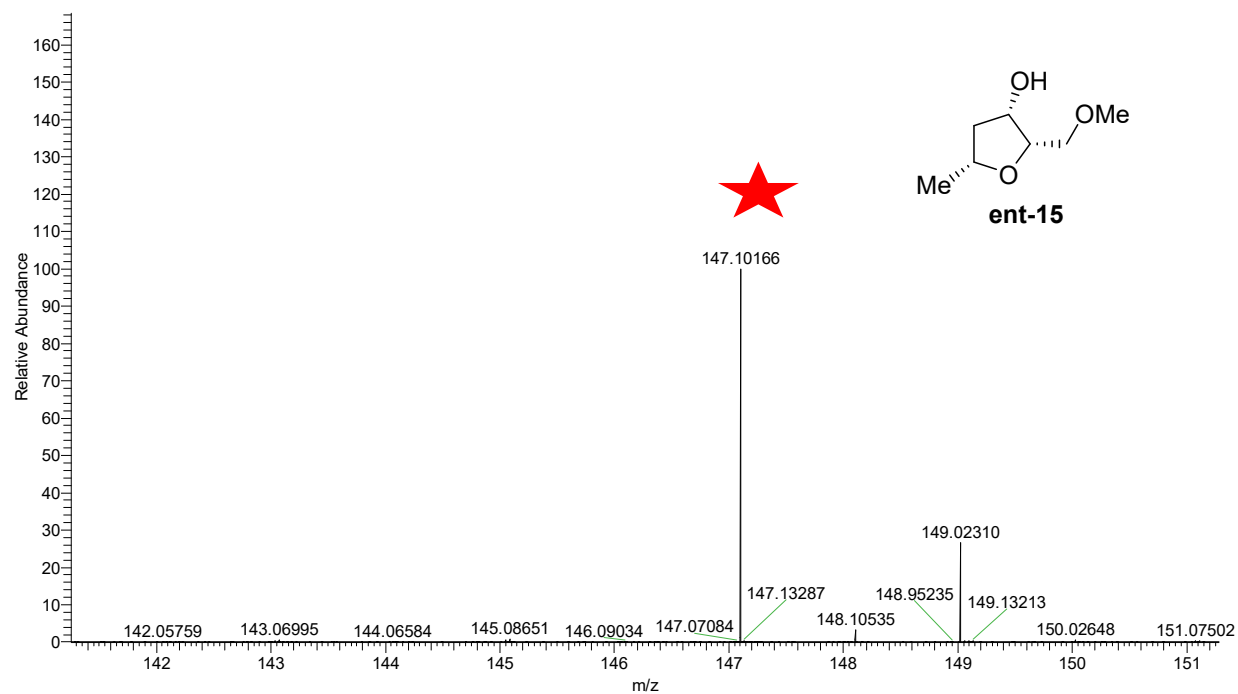

RIC-AS-12464\_APCI+\_ASH-OBC-16 #1-30 RT: 0.01-0.44 AV: 30 NL: 3.88E5  
T: FTMS + p APCI corona Full ms [160.00-500.00]

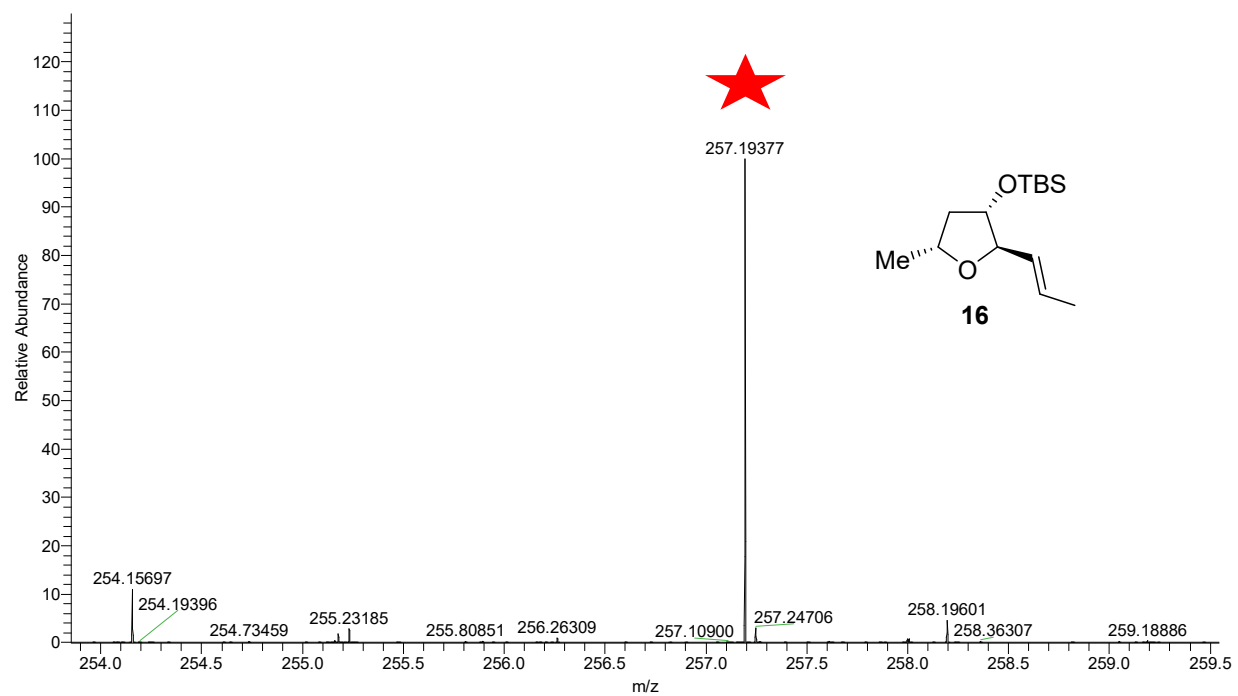

RIC-AS-12455\_ESI+\_ACN+H2O\_DL-01-159-ENT-16 #1-34 RT: 0.01-0.49 AV: 34 NL: 1.41E5  
T: FTMS + p ESI Full ms [100.00-800.00]

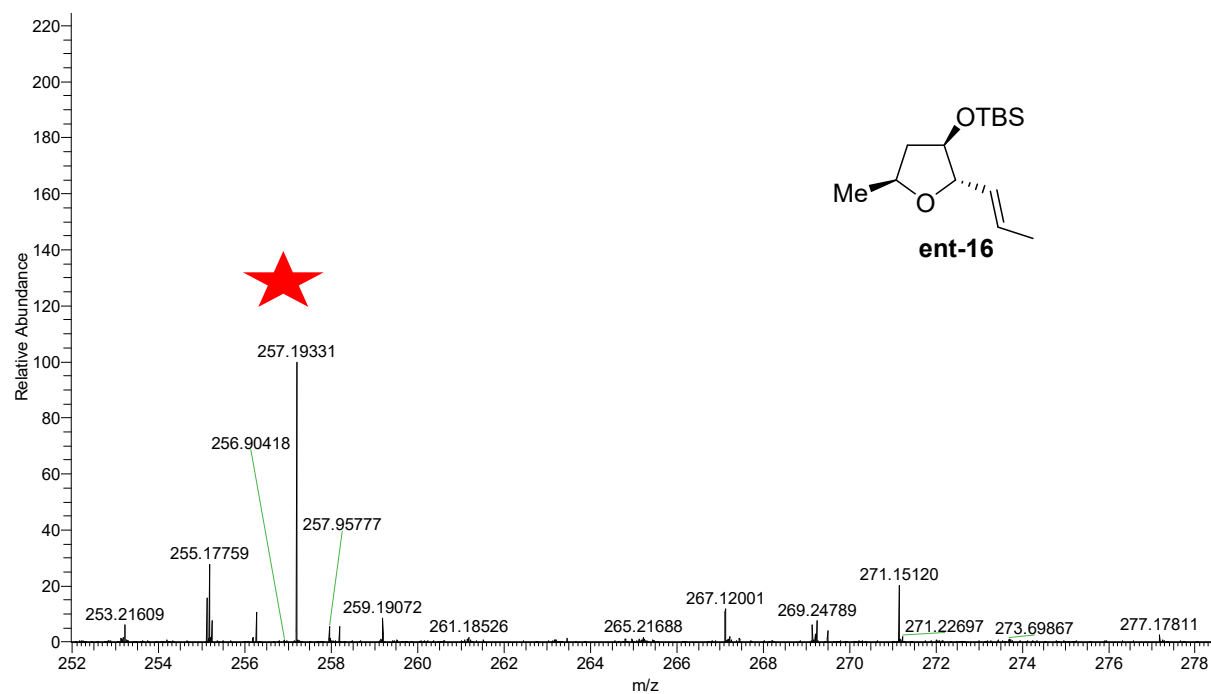

RIC-AS-12464\_APCI+\_ASH-OBC-17 #1-30 RT: 0.01-0.45 AV: 30 NL: 1.52E4  
T: FTMS + p APCI corona Full ms [105.00-400.00]

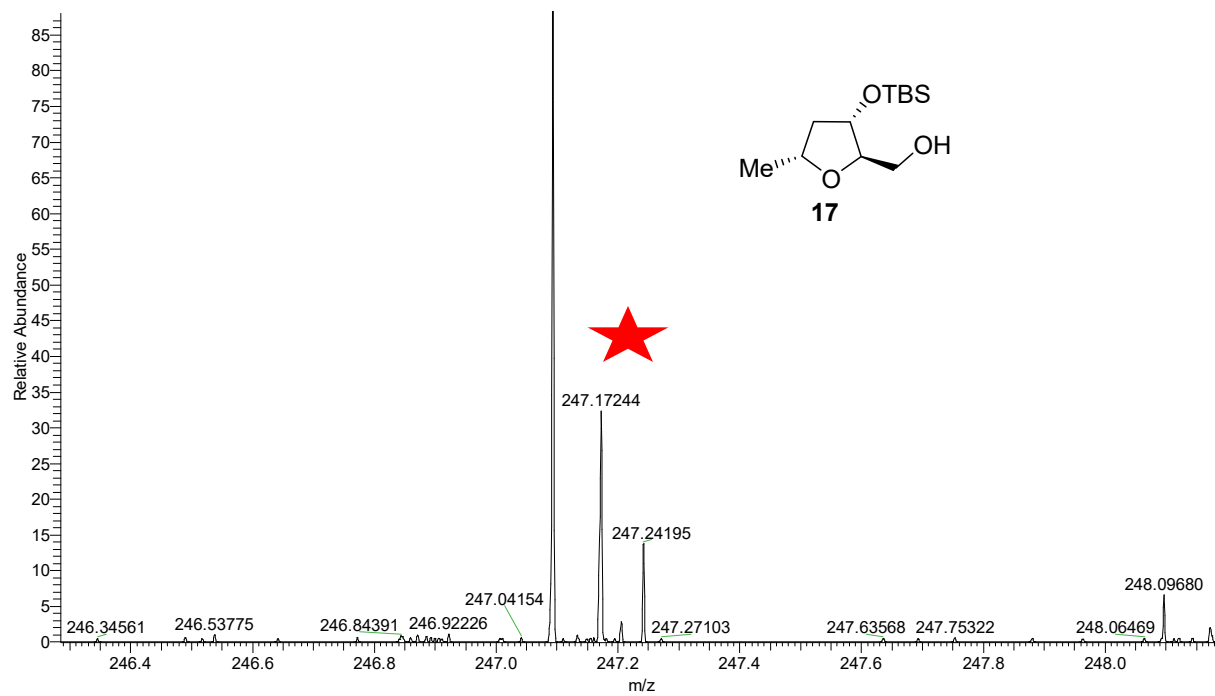

RIC-AS-12472\_APCI+\_MeOH\_ASH-OBC-ent-17 #1-30 RT: 0.01-0.43 AV: 30 NL: 3.75E7  
T: FTMS + p APCI corona Full ms [100.00-500.00]

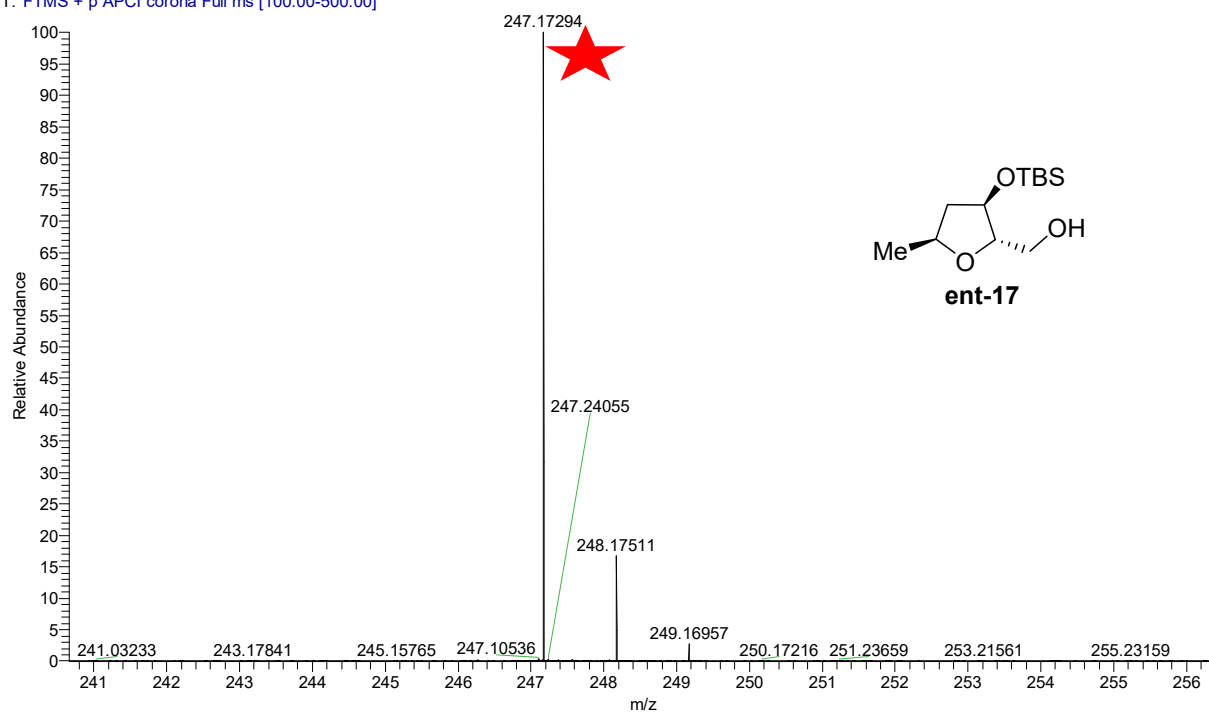

RIC-AS-12464\_APCI+\_ASH-OBC-18 #1-30 RT: 0.00-0.42 AV: 30 NL: 1.43E6  
T: FTMS + p APCI corona Full ms [100.00-500.00]

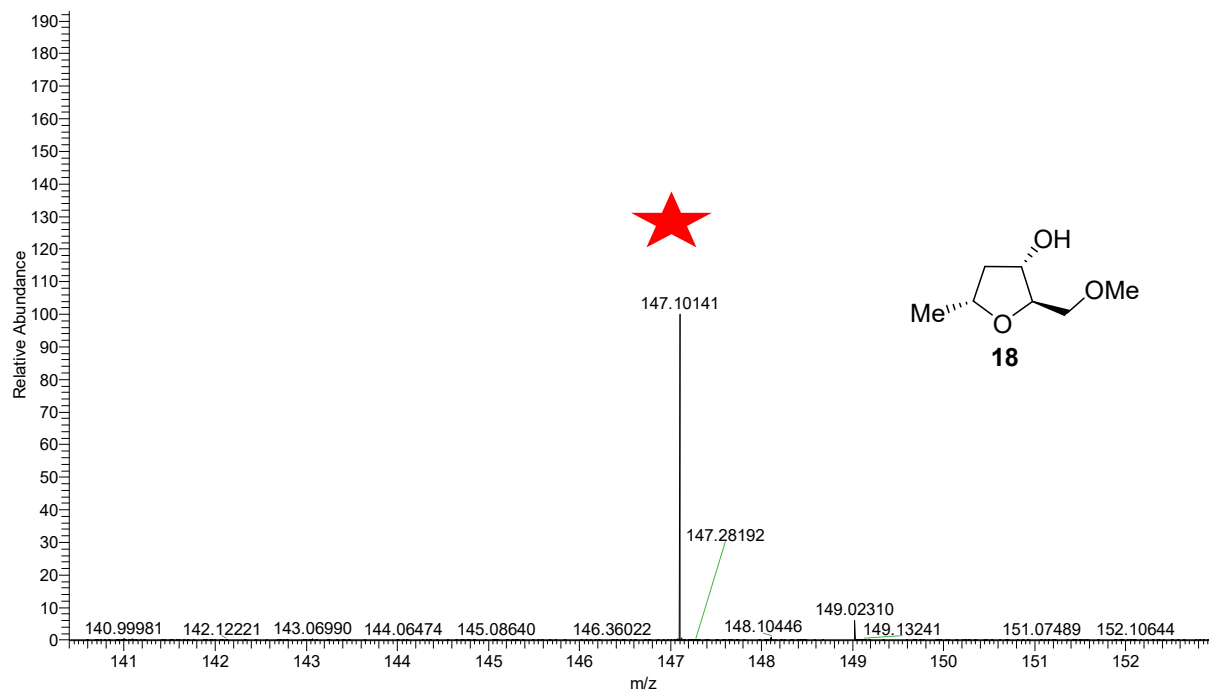

RIC-AS-12455\_APCI+\_ACN+H2O\_DL-01-081-ENT-18 #1-34 RT: 0.01-0.49 AV: 34 NL: 2.59E6  
T: FTMS + p APCI corona Full ms [100.00-800.00]

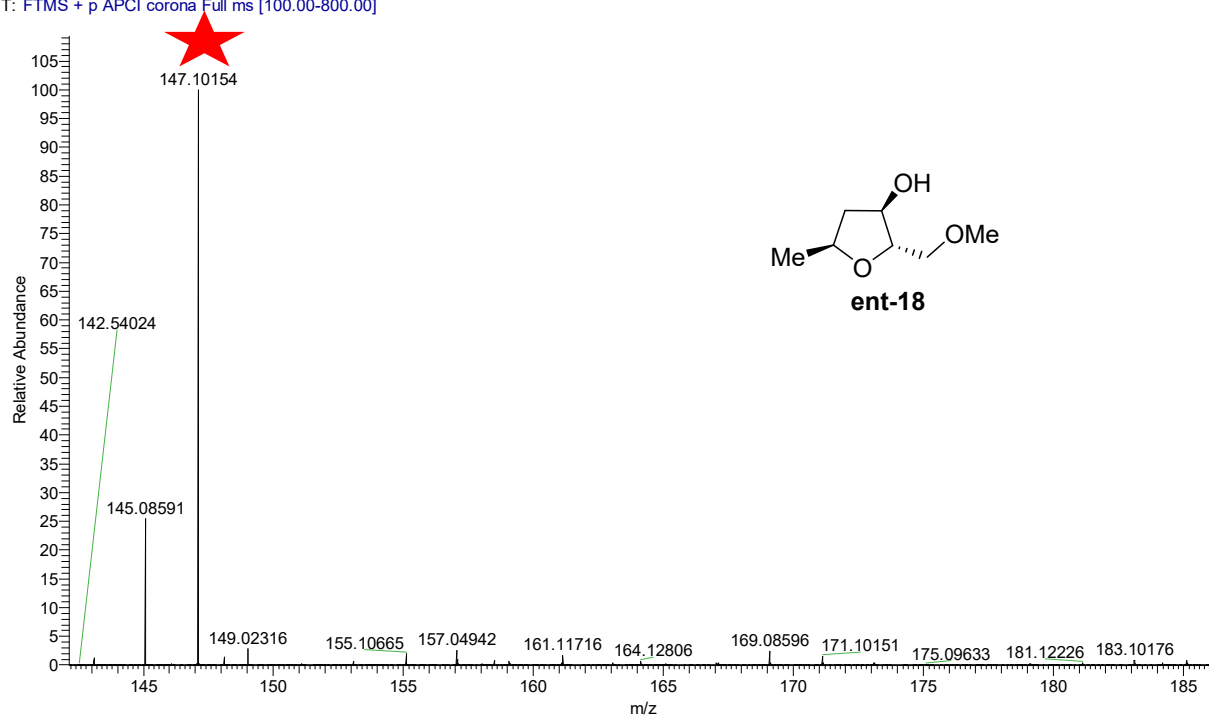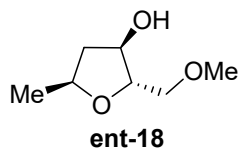

RIC-AS-12455\_APCI+\_ACN+H2O\_ASH-OBC-20 #1-35 RT: 0.01-0.50 AV: 35 NL: 2.69E7  
T: FTMS + p APCI corona Full ms [100.00-800.00]

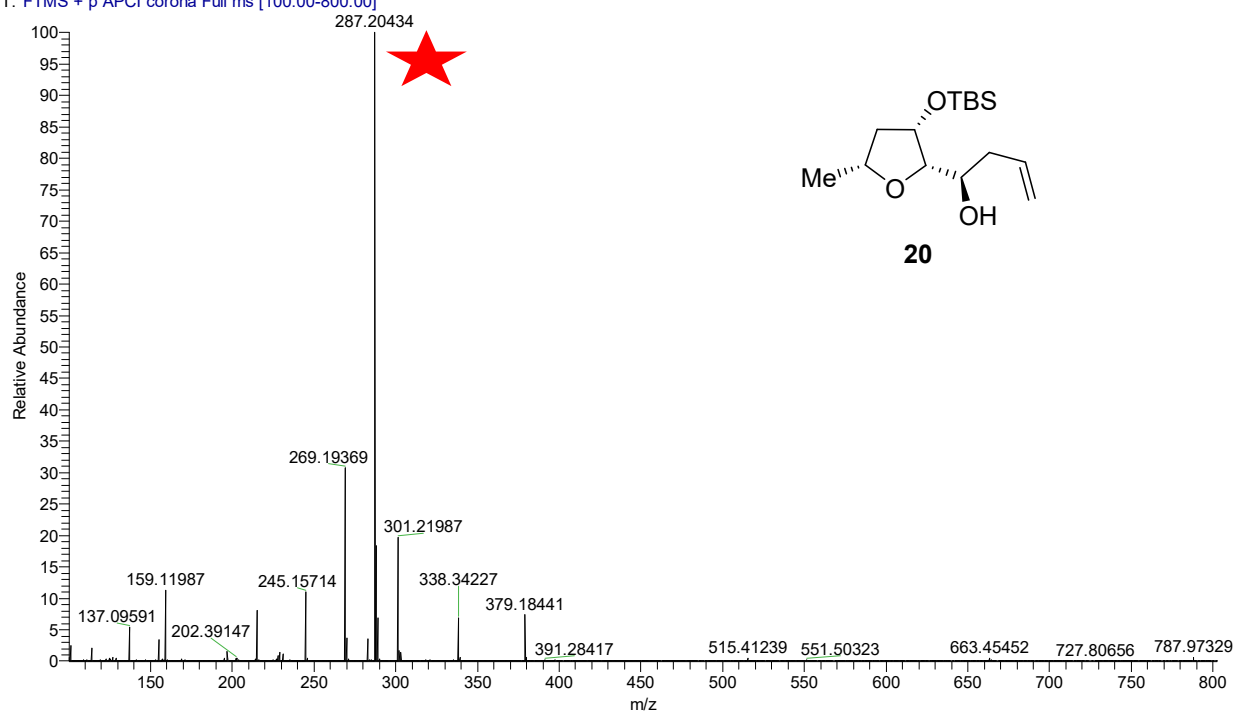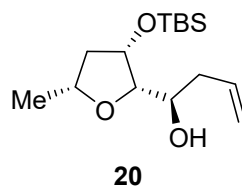

RIC-AS-12455\_APCI+\_ACN+H2O\_ASH-OBC-21 #1-34 RT: 0.01-0.50 AV: 34 NL: 4.66E6  
T: FTMS + p APCI corona Full ms [100.00-800.00]

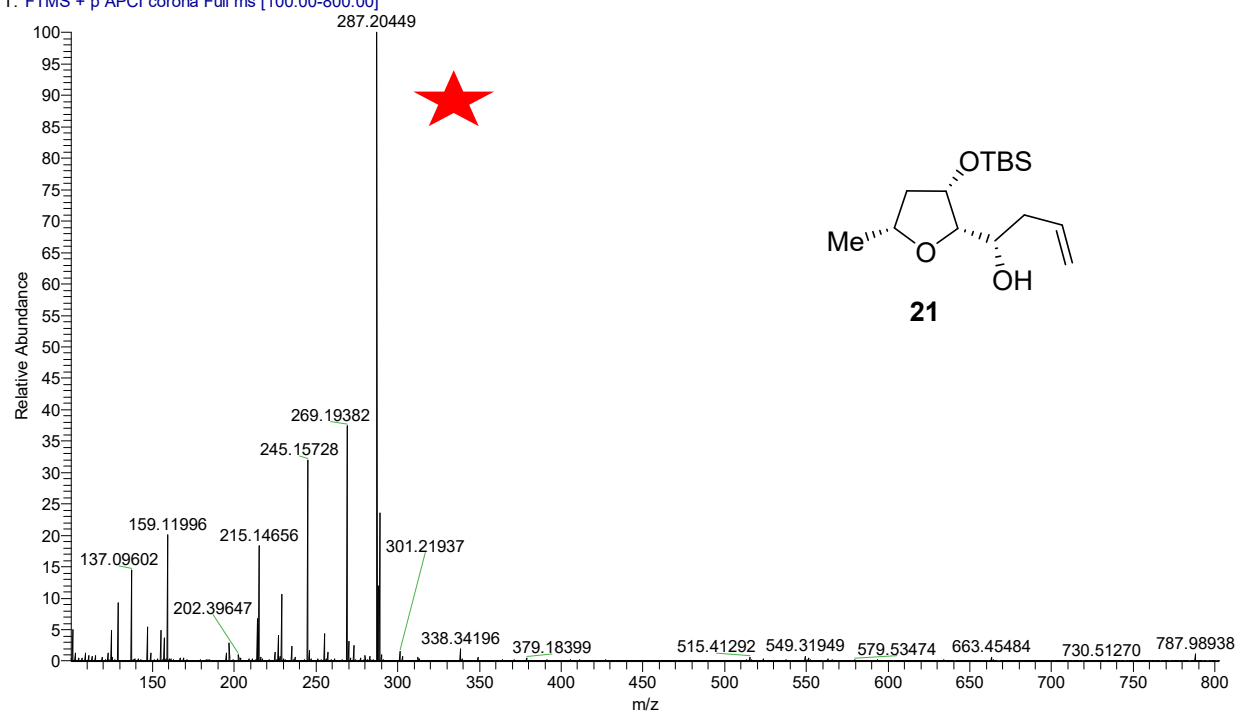

RIC-AS-12455\_ESI+\_ACN+H2O\_ASH-OBC-22 #1-35 RT: 0.01-0.50 AV: 35 NL: 5.72E6  
T: FTMS + p ESI Full ms [100.00-800.00]

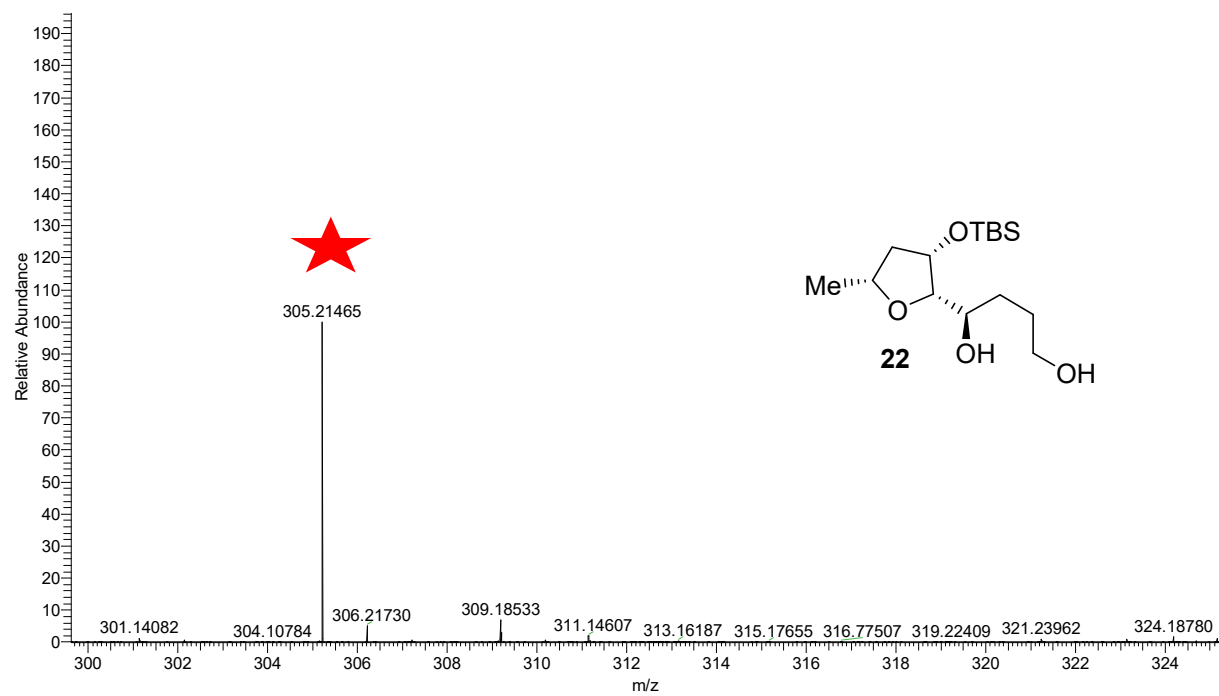

RIC-AS-12464\_APCI+\_ASH-OBC-24 #1-30 RT: 0.00-0.43 AV: 30 NL: 1.88E6  
T: FTMS + p APCI corona Full ms [105.00-400.00]

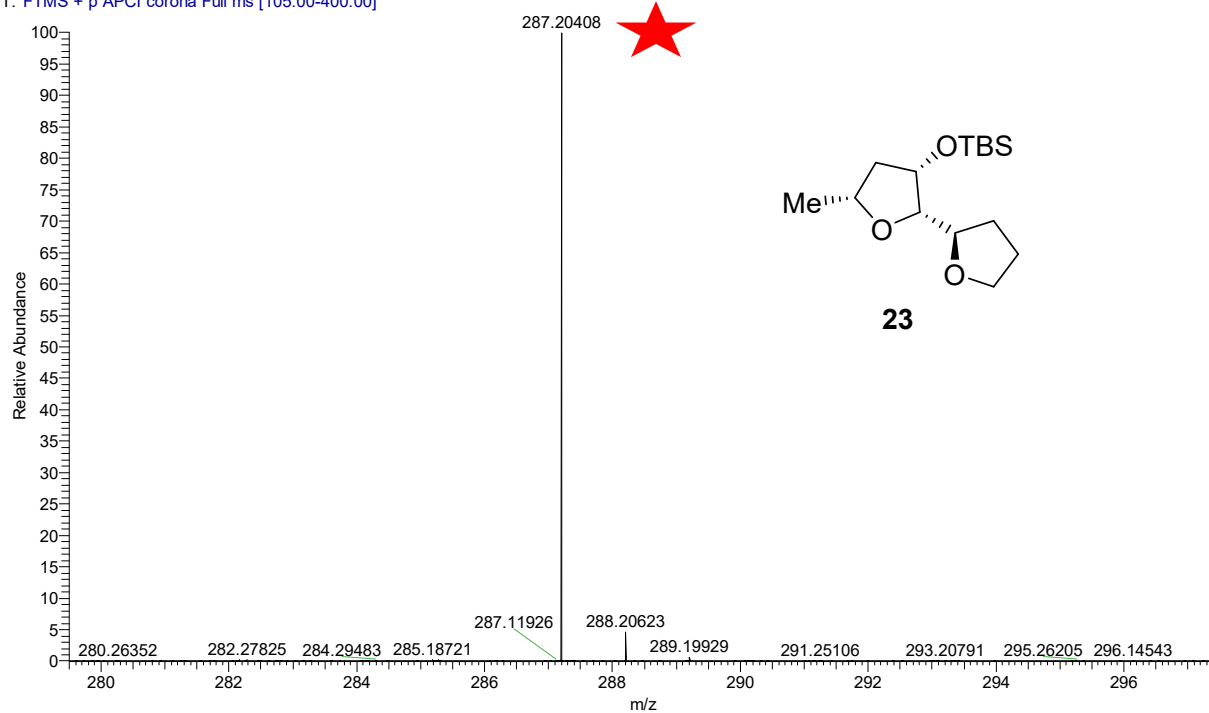

RIC-AS-12455\_APCI+\_ACN+H2O\_ASH-OBC-23 #1-34 RT: 0.01-0.50 AV: 34 NL: 1.86E6  
T: FTMS + p APCI corona Full ms [100.00-800.00]

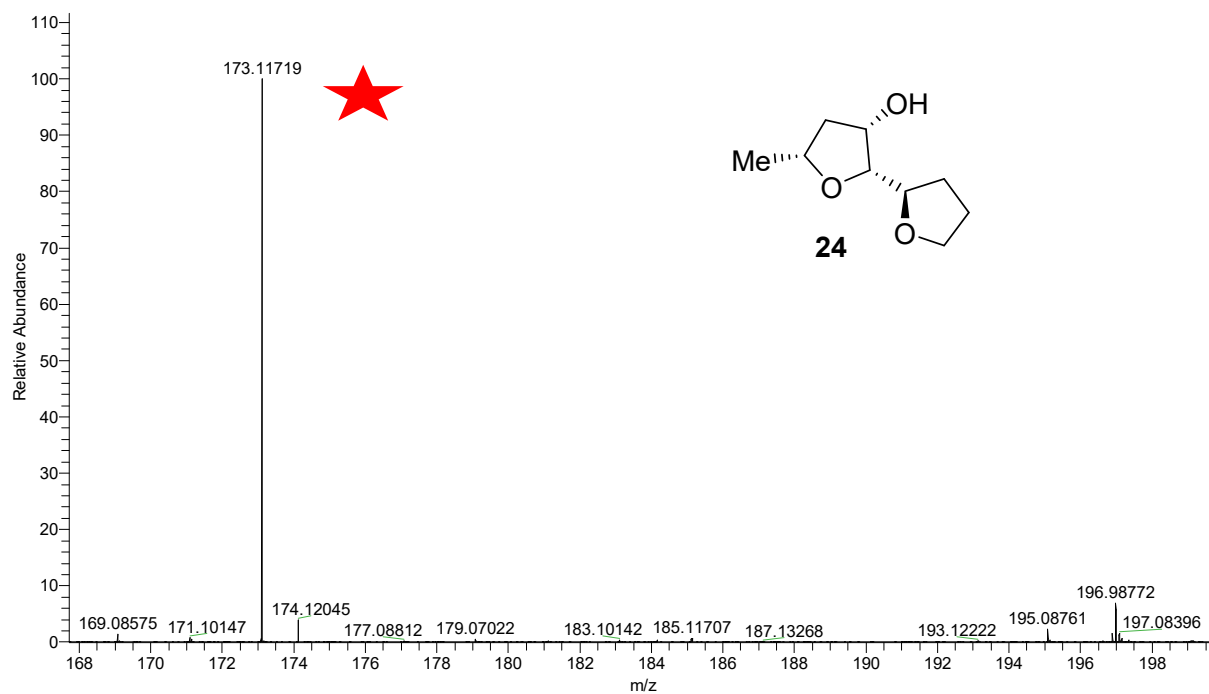

RIC-AS-12464\_APCI+\_ASH-OBC-25 #1-30 RT: 0.01-0.43 AV: 30 NL: 3.11E7  
T: FTMS + p APCI corona Full ms [100.00-500.00]

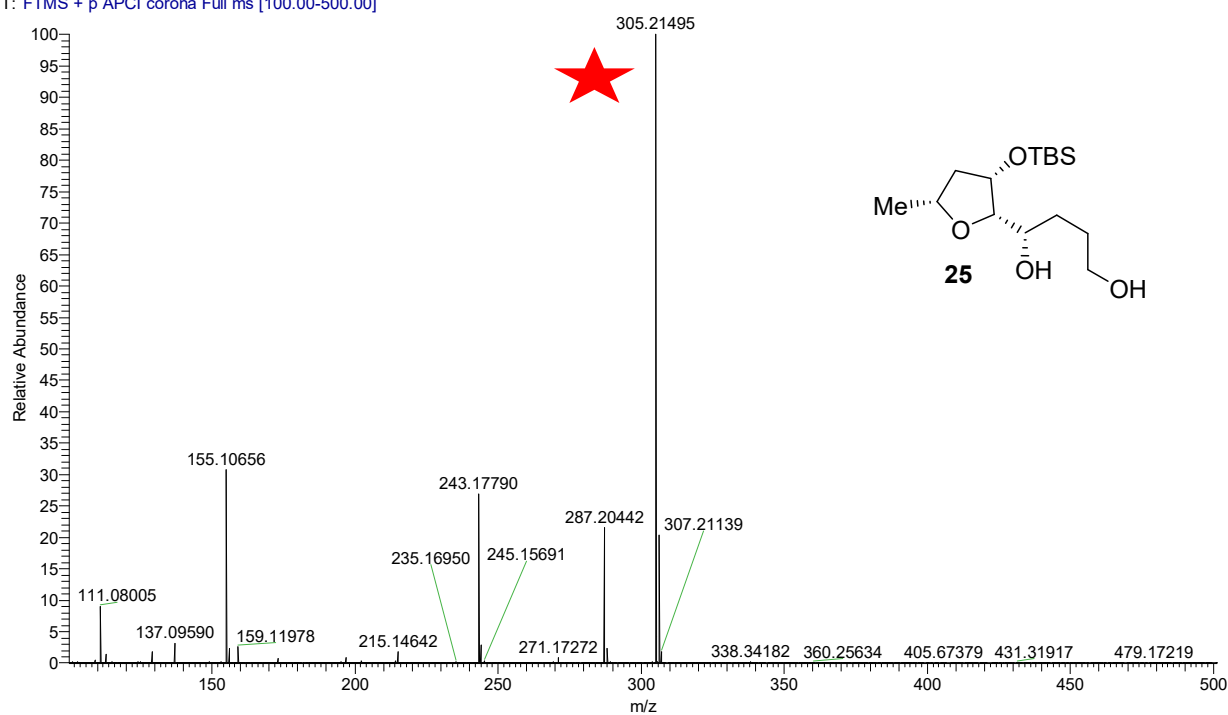

RIC-AS-12455\_ESI+\_ACN+H2O\_ASH-OBC-27 #1-35 RT: 0.00-0.49 AV: 35 NL: 3.51E7  
T: FTMS + p ESI Full ms [100.00-800.00]

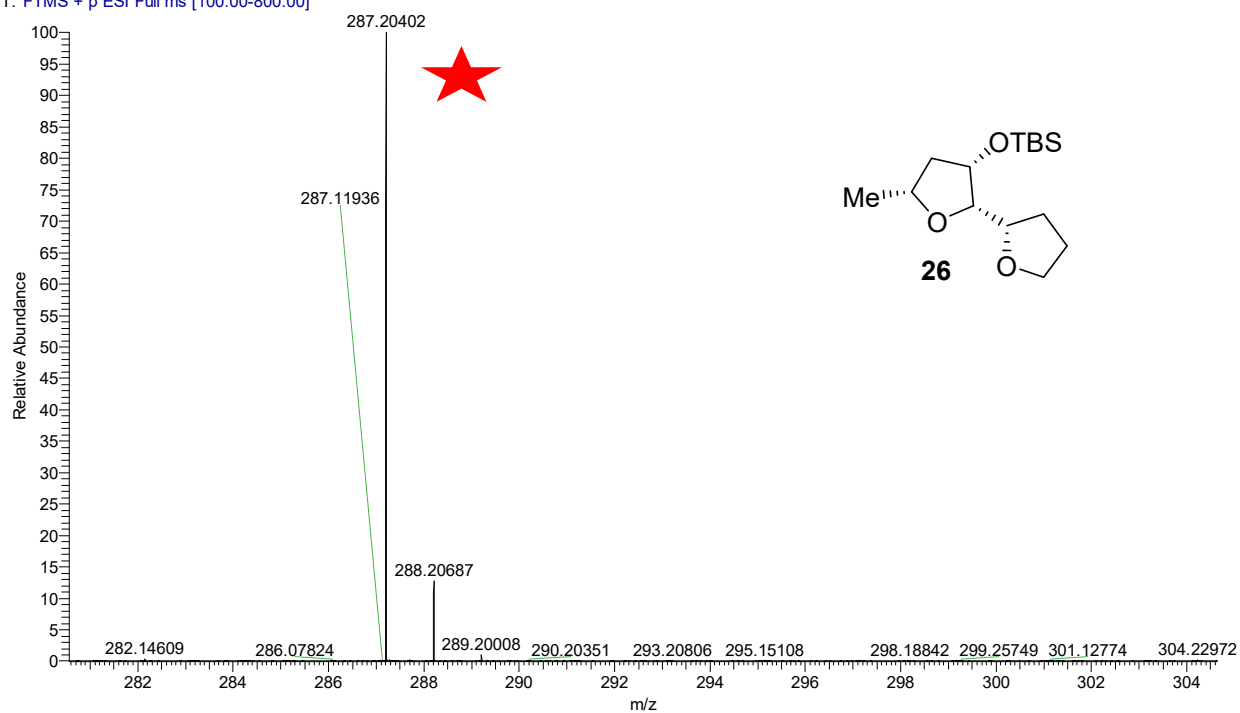

RIC-AS-12464\_APCI+\_ASH-OBC-27 #1-30 RT: 0.01-0.42 AV: 30 NL: 4.94E6  
T: FTMS + p APCI corona Full ms [105.00-400.00]

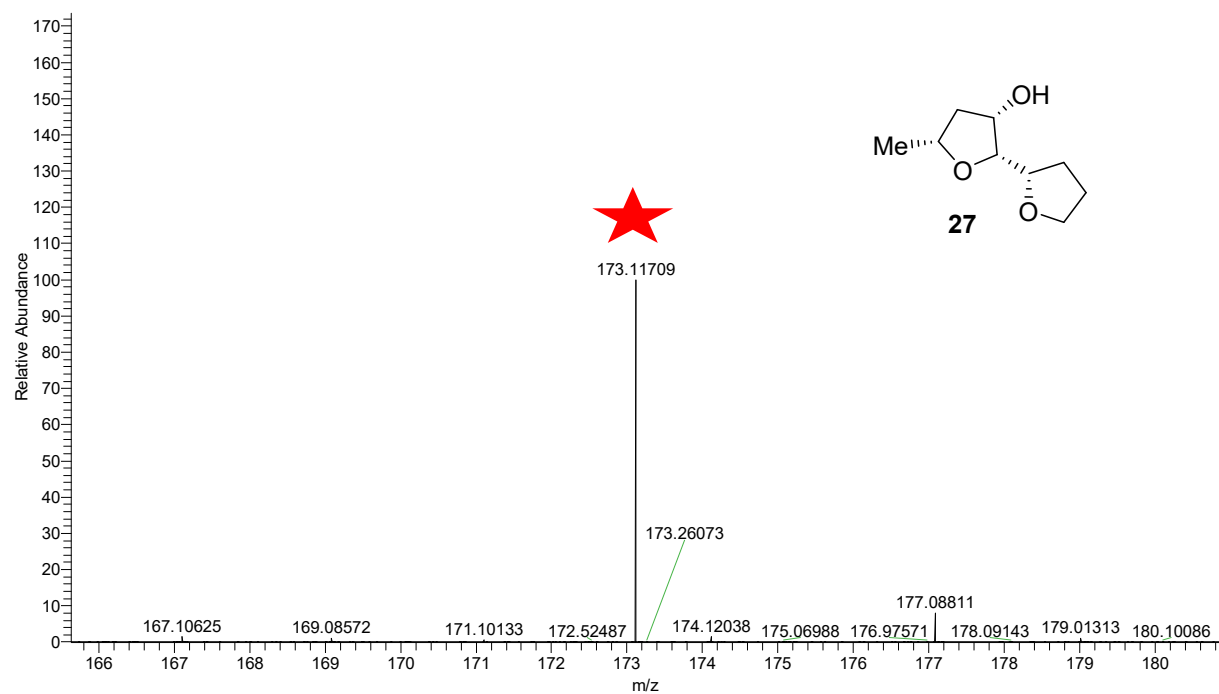

RIC-AS-12455\_APCI+\_ACN+H2O\_DL-01-090 #1-35 RT: 0.01-0.50 AV: 35 NL: 2.30E6  
T: FTMS + p APCI corona Full ms [100.00-800.00]

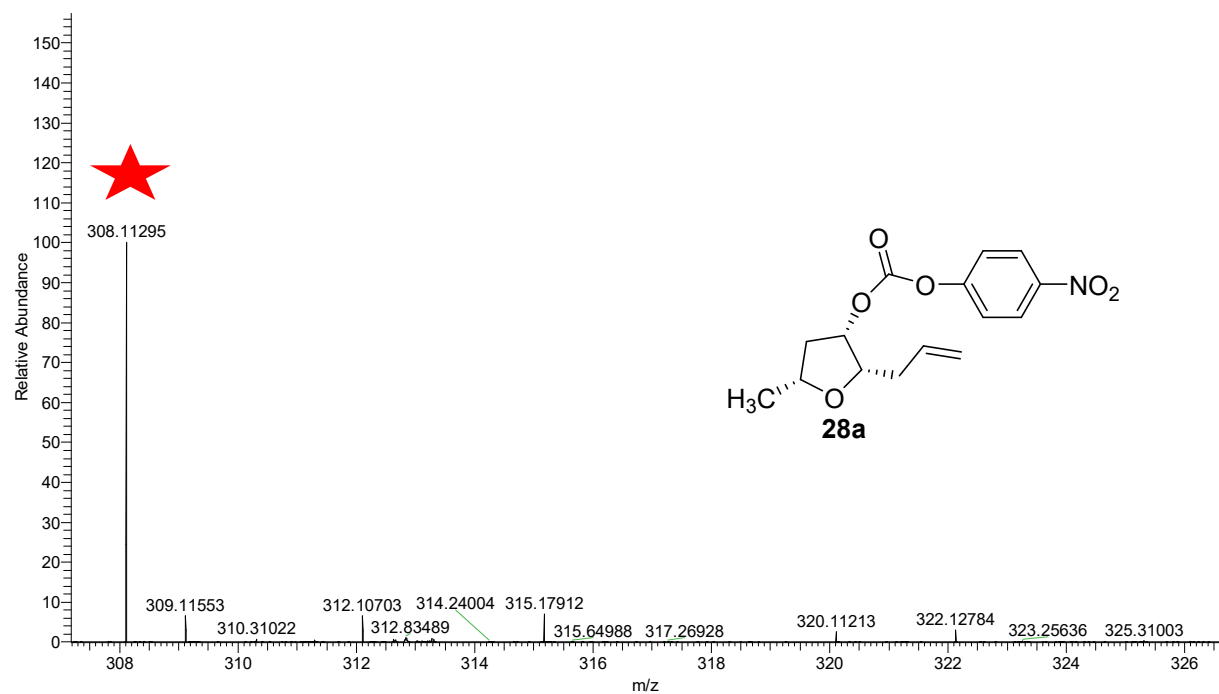



RIC-AS-12464\_APCI+\_ASH-OBC-28B #1-30 RT: 0.01-0.45 AV: 30 NL: 3.50E5  
T: FTMS + p APCI corona Full ms [160.00-500.00]

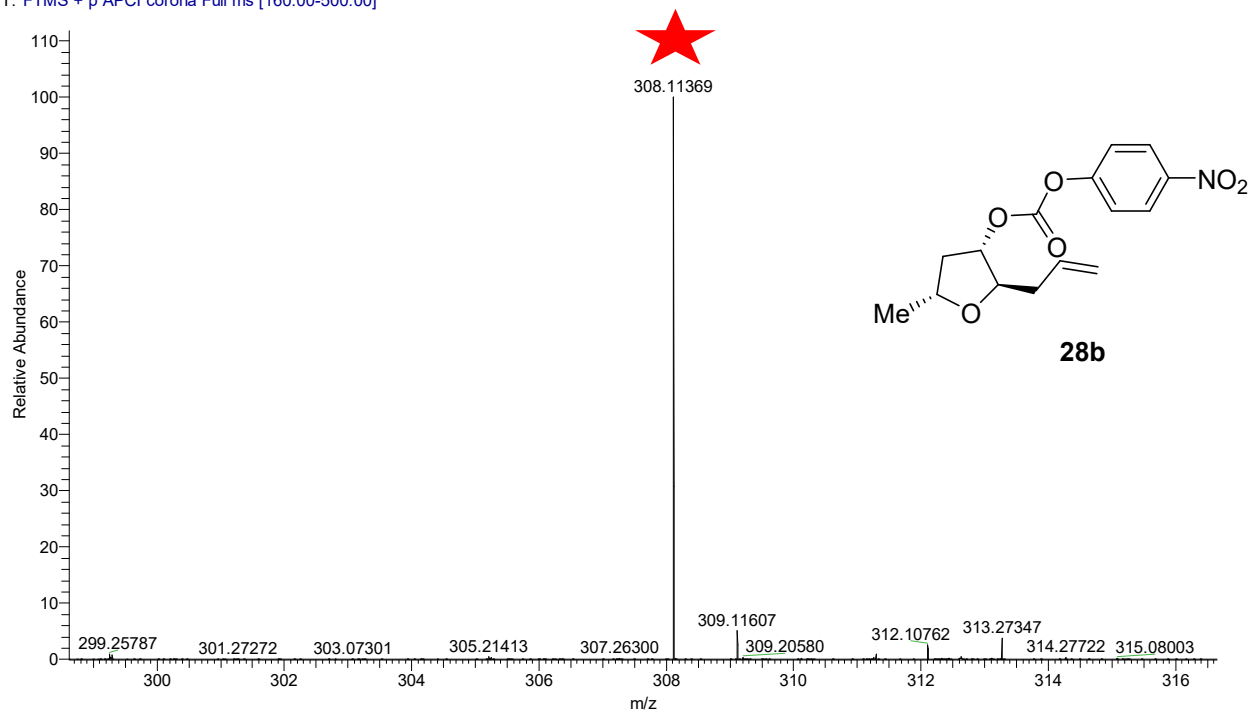

RIC-AS-12455\_APCI+\_ACN+H2O\_DL-01-170 #1-35 RT: 0.00-0.49 AV: 35 NL: 5.79E7  
T: FTMS + p APCI corona Full ms [100.00-800.00]

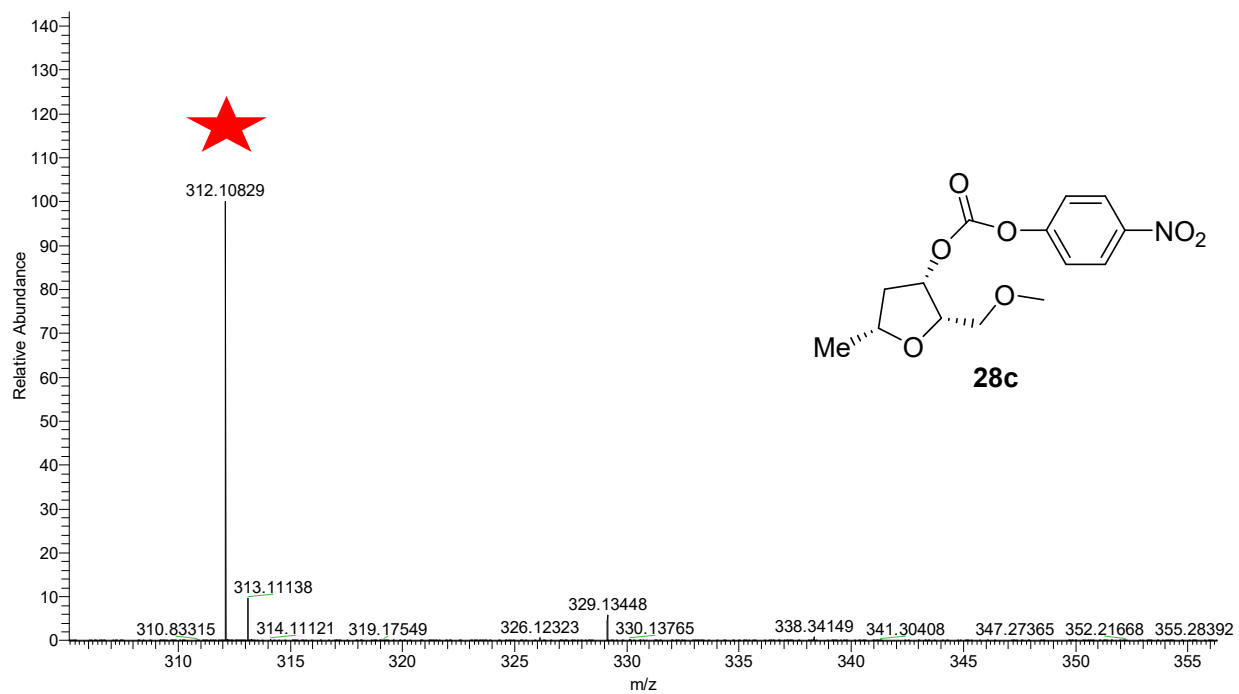

RIC-AS-12464\_APCI+\_ASH-OBC-28D #1-30 RT: 0.00-0.43 AV: 30 NL: 8.36E5  
T: FTMS + p APCI corona Full ms [160.00-500.00]

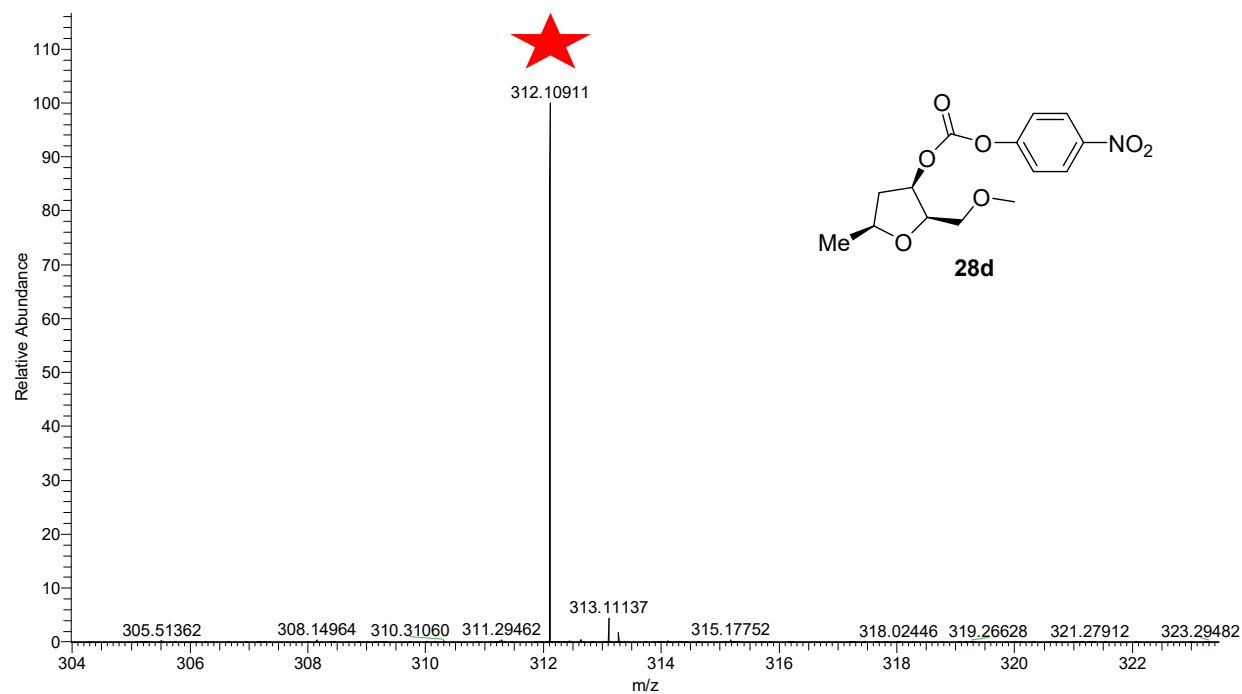

RIC-AS-12455\_APCI+\_ACN+H2O\_DL-03-064 #1-33 RT: 0.01-0.49 AV: 33 NL: 2.87E5  
T: FTMS + p APCI corona Full ms [100.00-800.00]

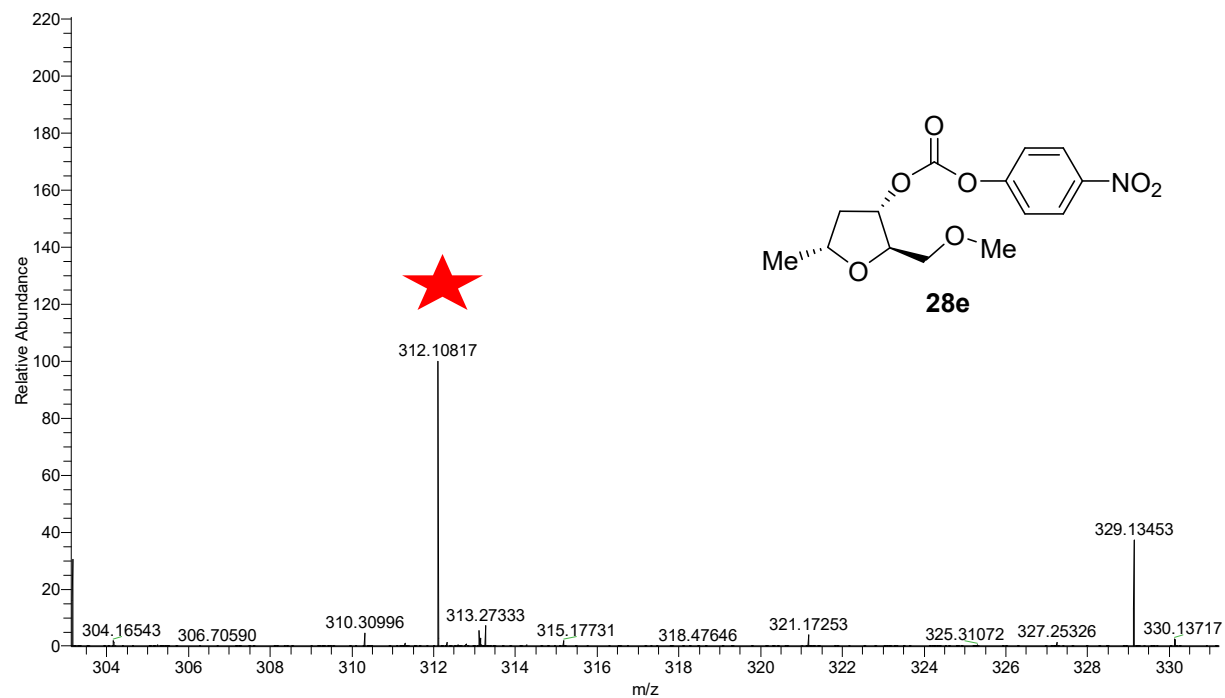

RIC-AS-12464\_APCI+\_ASH-OBC-28F #1-30 RT: 0.00-0.44 AV: 30 NL: 5.46E5  
T: FTMS + p APCI corona Full ms [160.00-500.00]

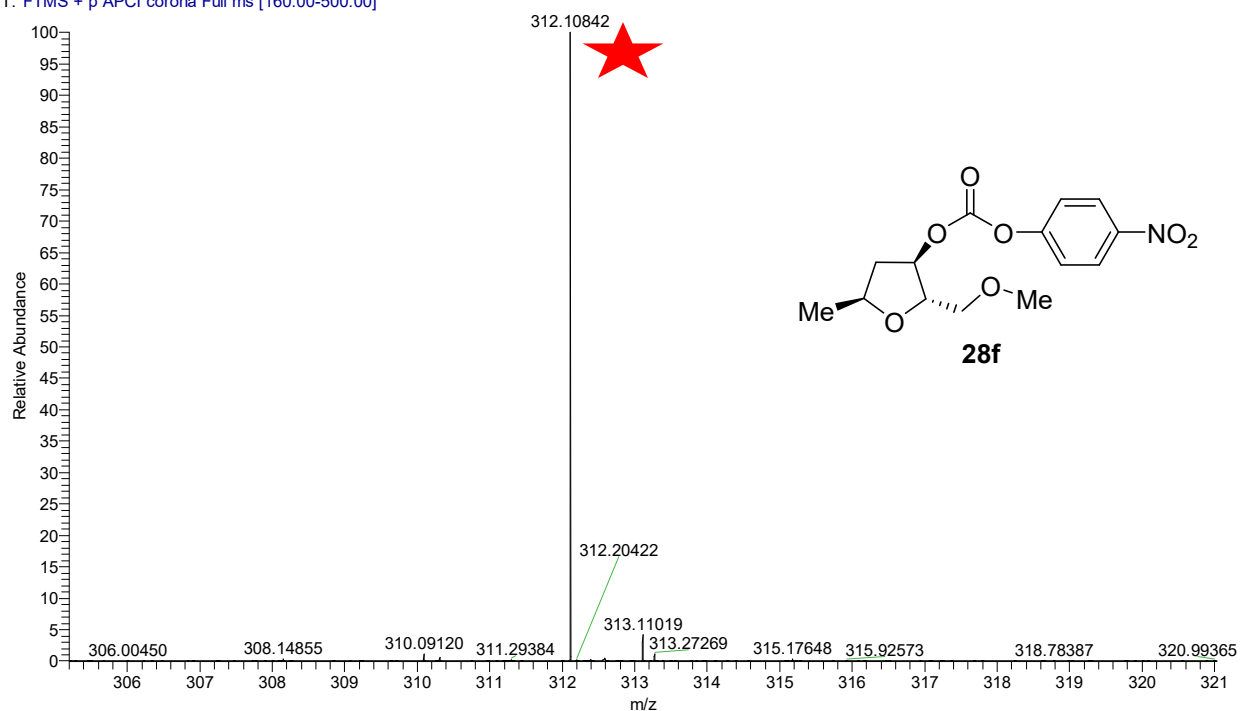

RIC-AS-12464\_APCI+\_ASH-OBC-28G #1-30 RT: 0.01-0.43 AV: 30 NL: 8.83E6  
T: FTMS + p APCI corona Full ms [160.00-500.00]

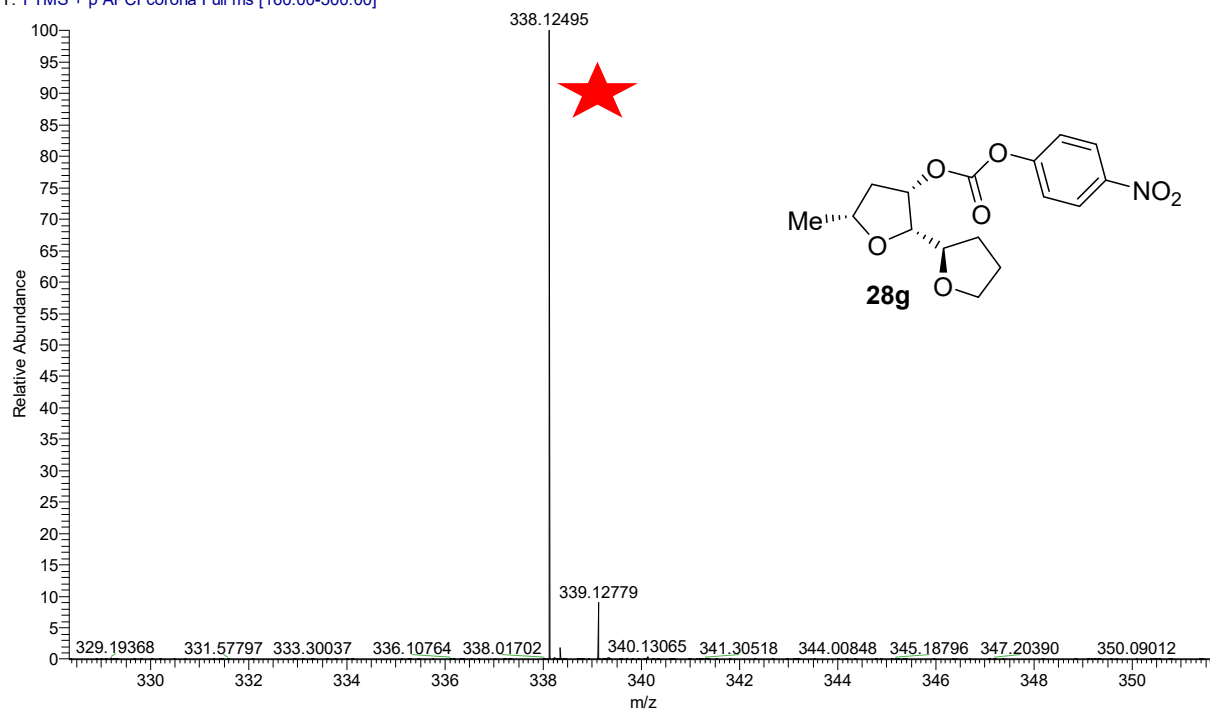

RIC-AS-12464\_APCI+\_ASH-OBC-28H#1-30 RT: 0.00-0.44 AV: 30 NL: 3.95E5  
T: FTMS + p APCI corona Full ms [100.00-500.00]

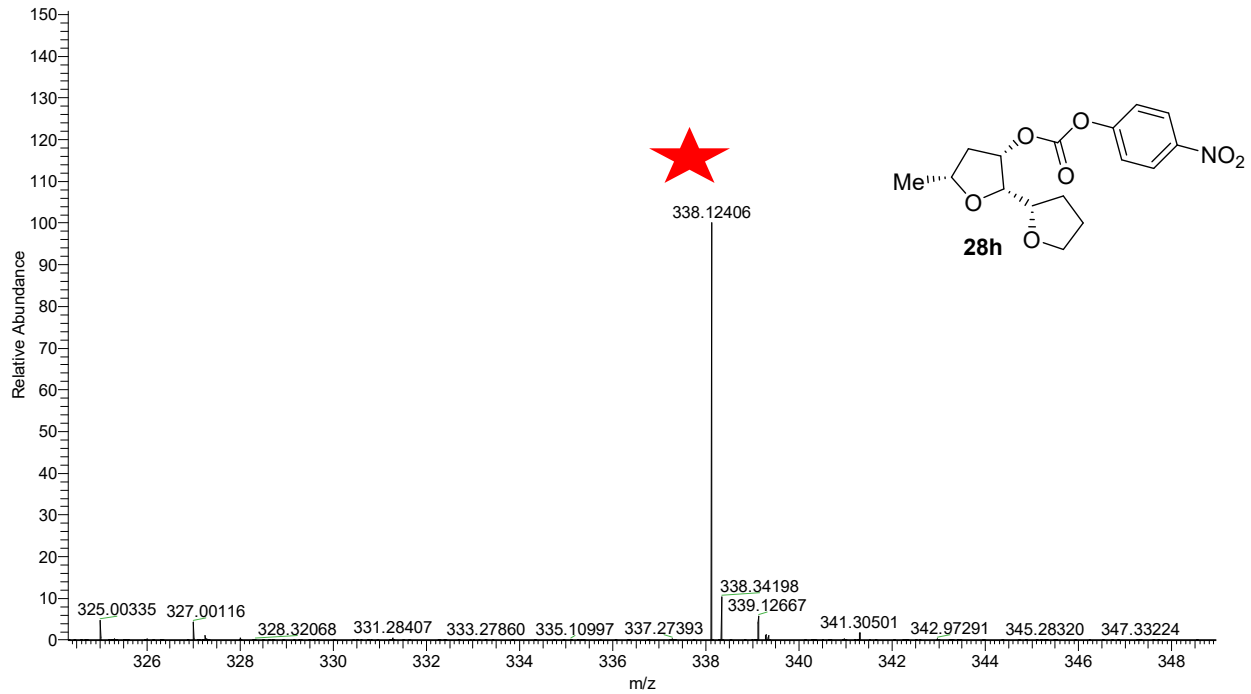

DL9 11 2 20 ESI\_201102085551 #5-10 RT: 0.06-0.13 AV: 6 NL: 2.62E7  
T: FTMS + c ESI Full ms [200.00-800.00]

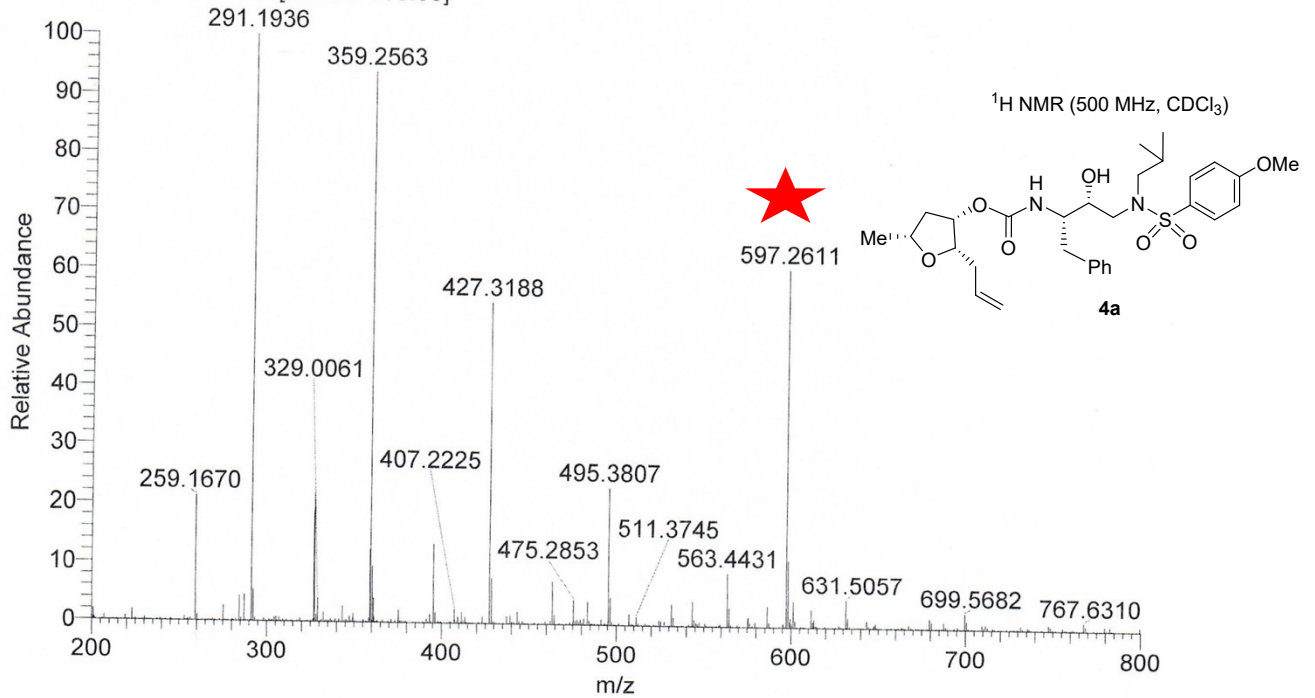

DL26 10 29 20 ESI\_201029103720 #3-4 RT: 0.04-0.05 AV: 2 NL: 1.12E8  
T: FTMS + c ESI Full ms [200.00-800.00]

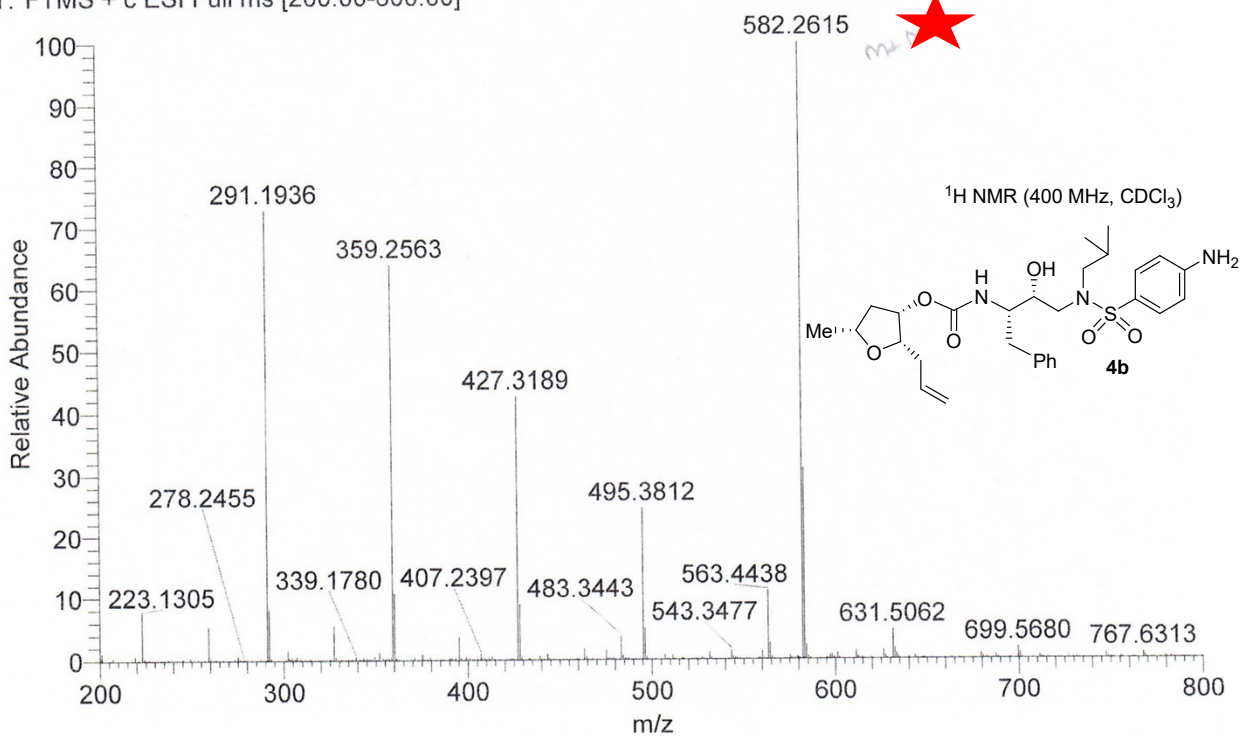

DL1 110 27 20 ESI\_201027104711 #5-8 RT: 0.07-0.11 AV: 4 NL: 4.07E6  
T: FTMS + c ESI Full ms [200.00-800.00]

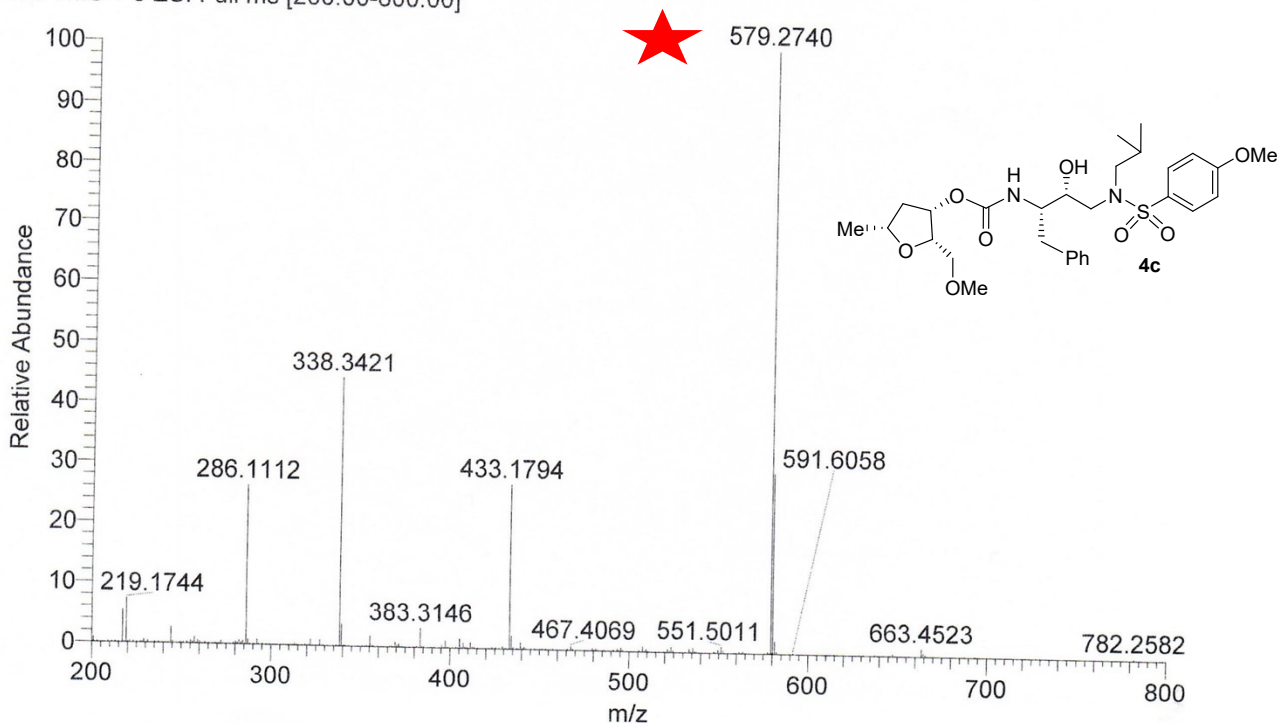

Time (min)  
DL8 110 27 20 ESI\_201027104711 #6-8 RT: 0.08-0.11 AV: 3 NL: 2.77E7  
T: FTMS + c ESI Full ms [250.00-700.00]

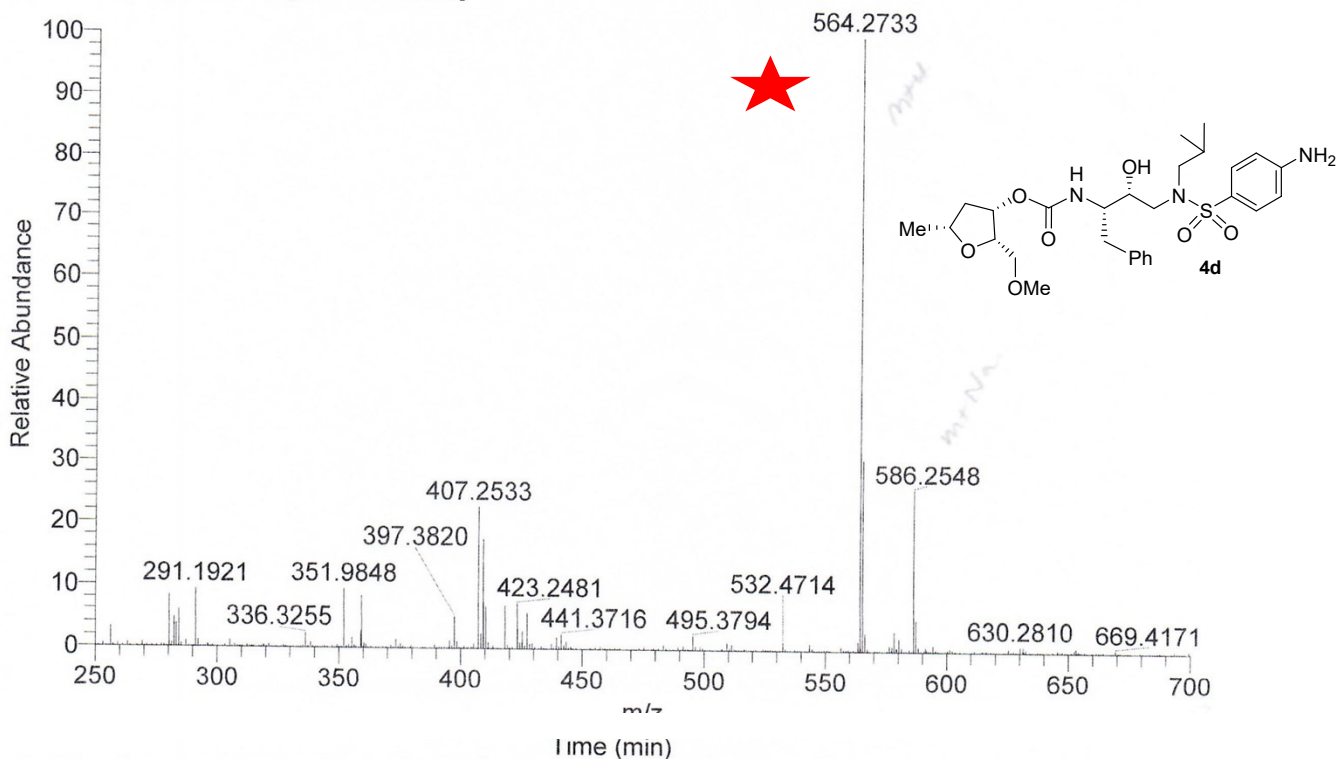

DL10 10 29 20 ESI\_201029103720 #3-6 RT: 0.03-0.07 AV: 4 NL: 1.20E8  
T: FTMS + c ESI Full ms [200.00-800.00]

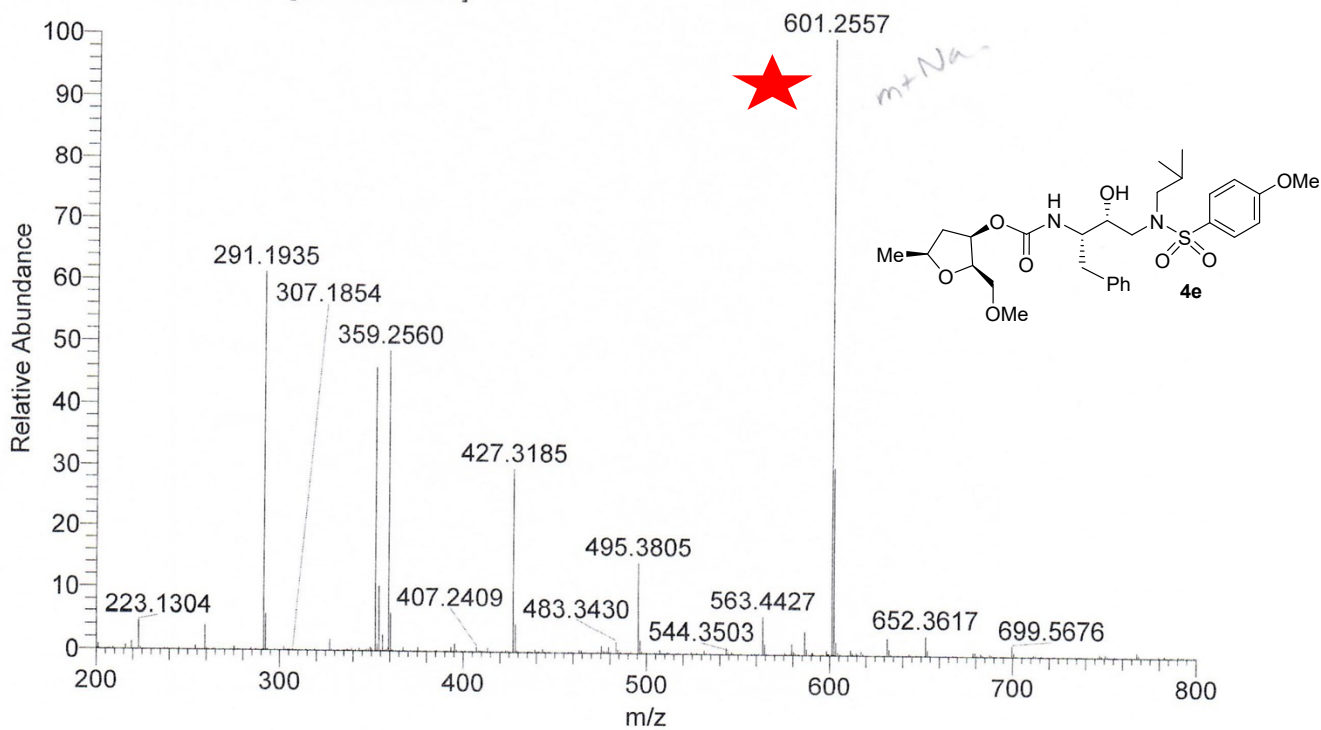

DL2 11 2 20 ESI\_201030103459 #2-3 RT: 0.02-0.03 AV: 2 NL: 1.33E7  
T: FTMS + c ESI Full ms [200.00-800.00]

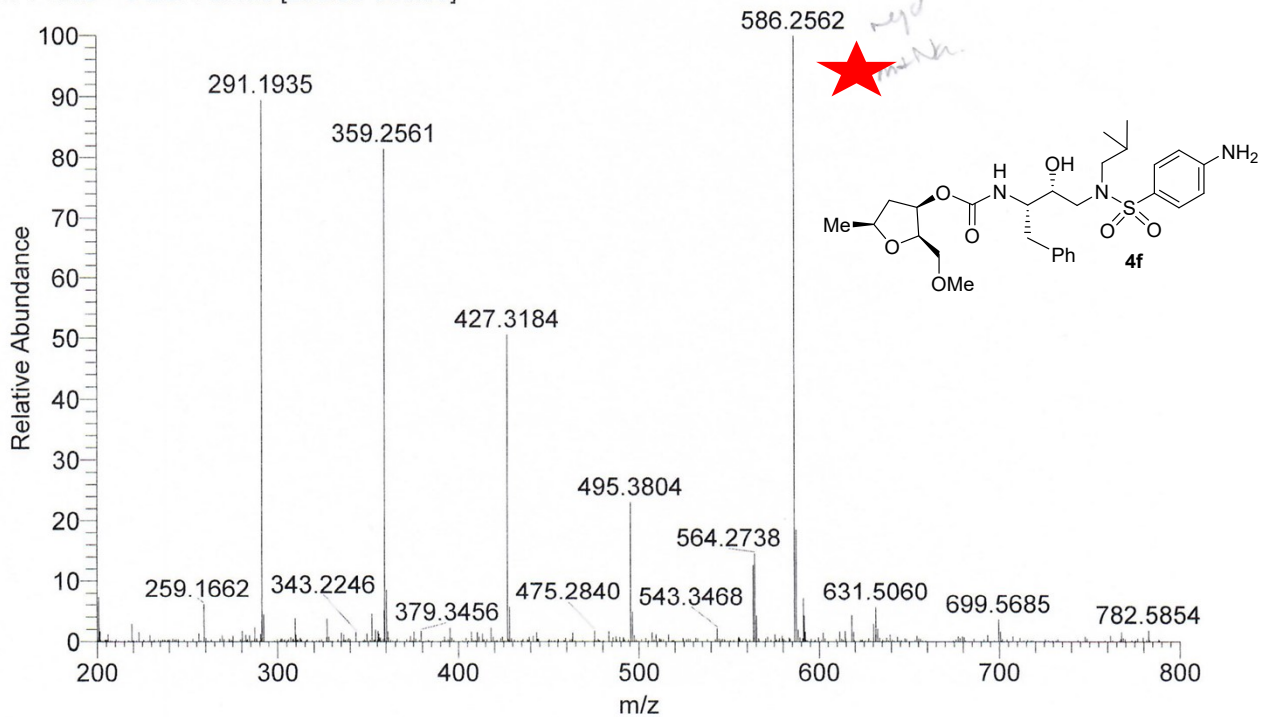

DL15 10 29 20 ESI\_201029103720 #7-11 RT: 0.09-0.15 AV: 5 NL: 7.35E7  
T: FTMS + c ESI Full ms [200.00-800.00]

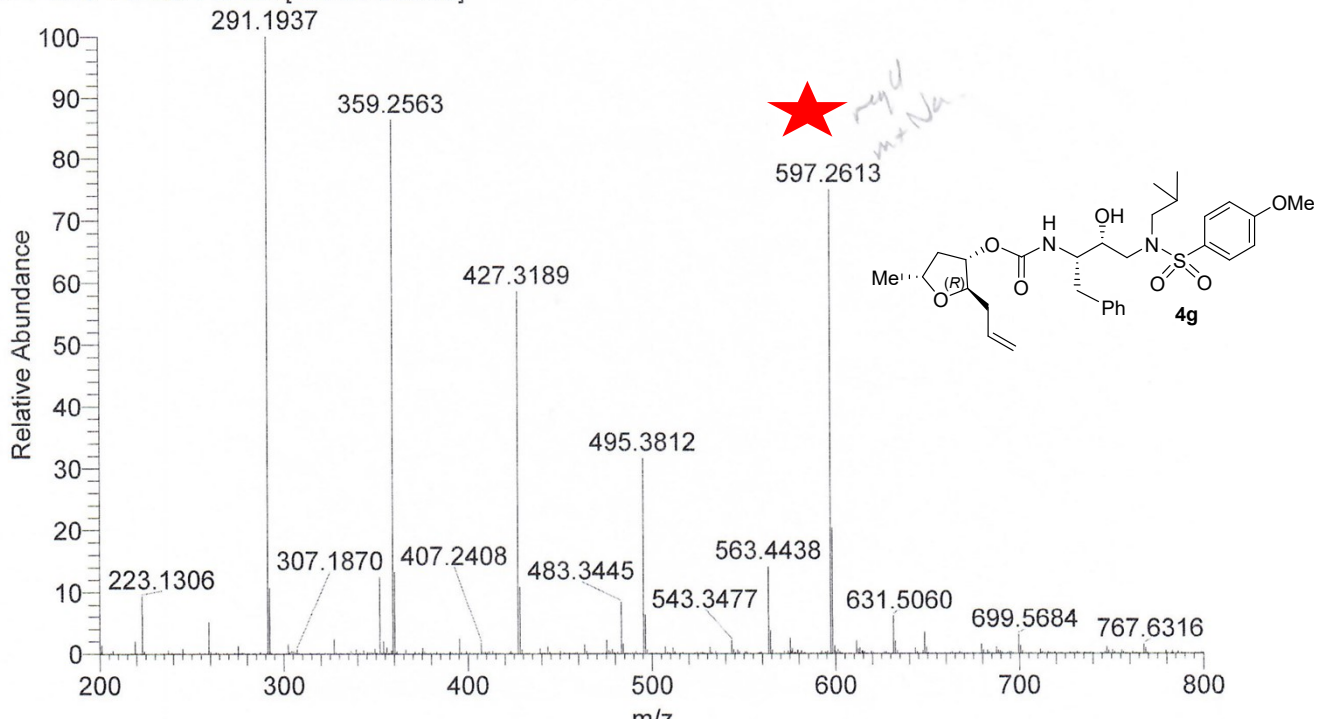

DL31 10 29 20 ESI\_201029103720 #6-7 RT: 0.08-0.09 AV: 2 NL: 5.09E7  
T: FTMS + c ESI Full ms [200.00-800.00]

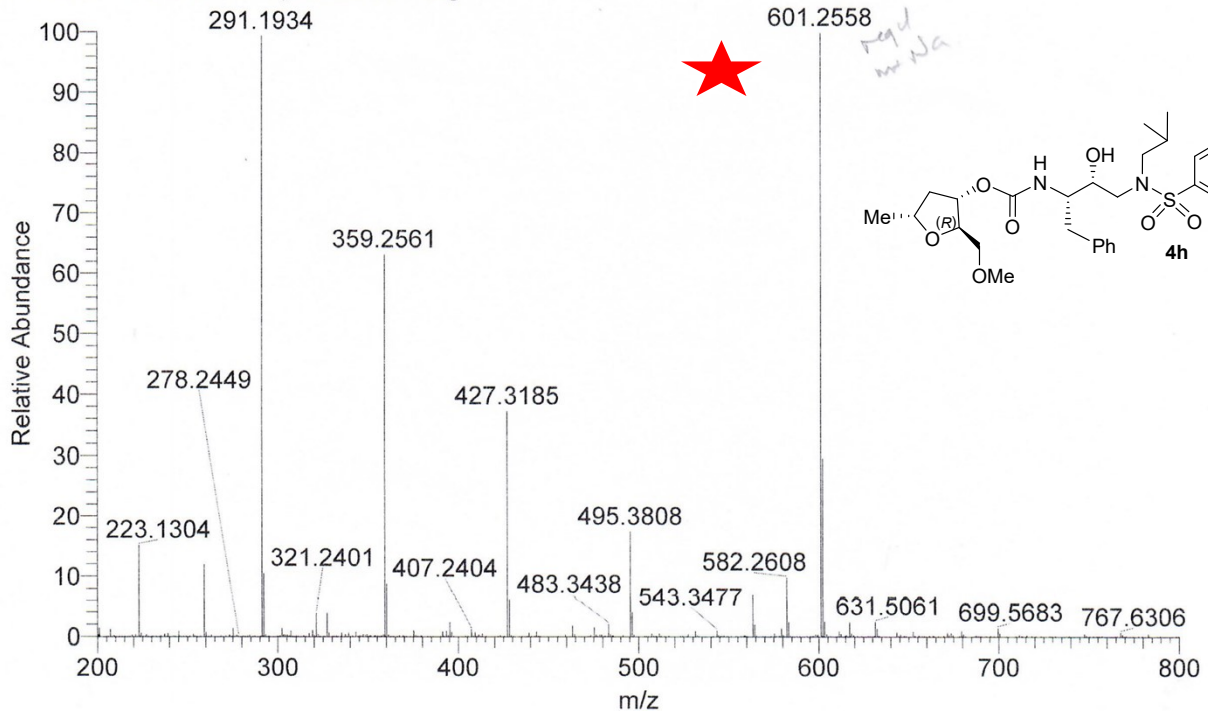

DL1 10 29 20 ESI\_201028110523 #3-4 RT: 0.04-0.05 AV: 2 NL: 7.14E7  
T: FTMS + c ESI Full ms [200.00-800.00]

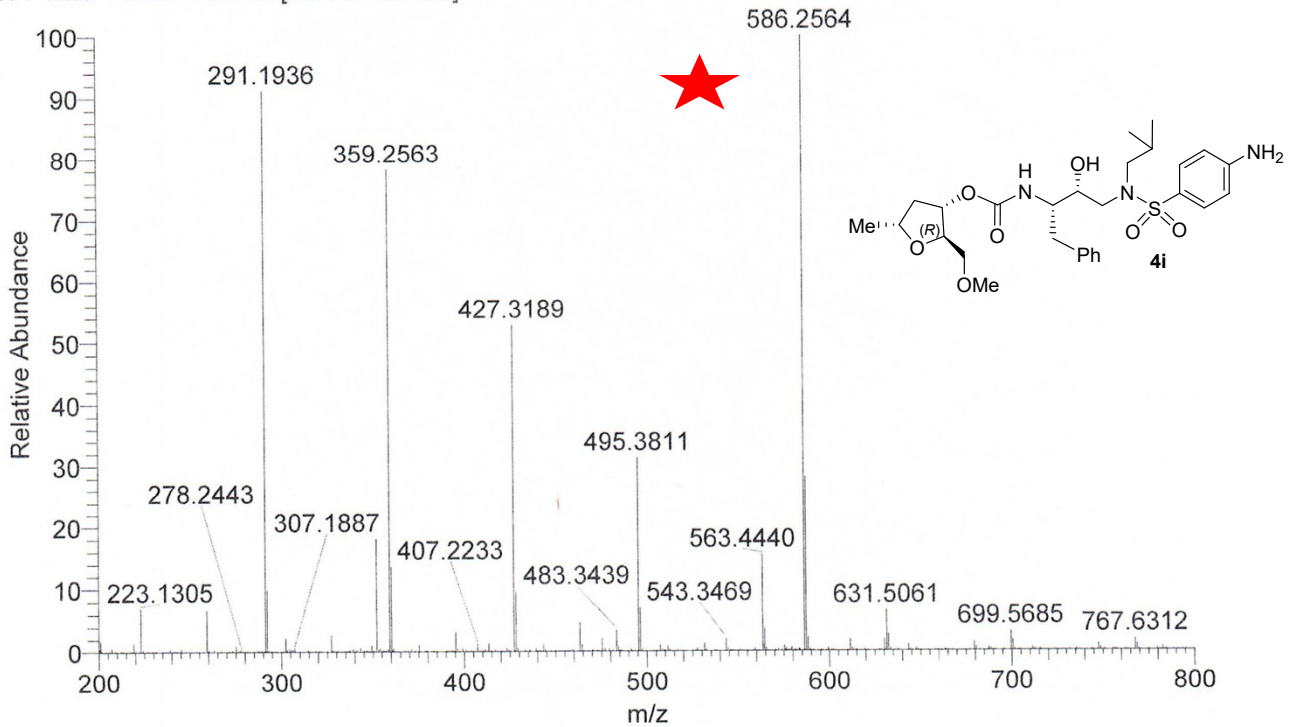



Time (min)  
 DL6 10 29 20 ESI\_201029103720 #5-7 RT: 0.06-0.09 AV: 3 NL: 1.80E8  
 T: FTMS + c ESI Full ms [200.00-800.00]

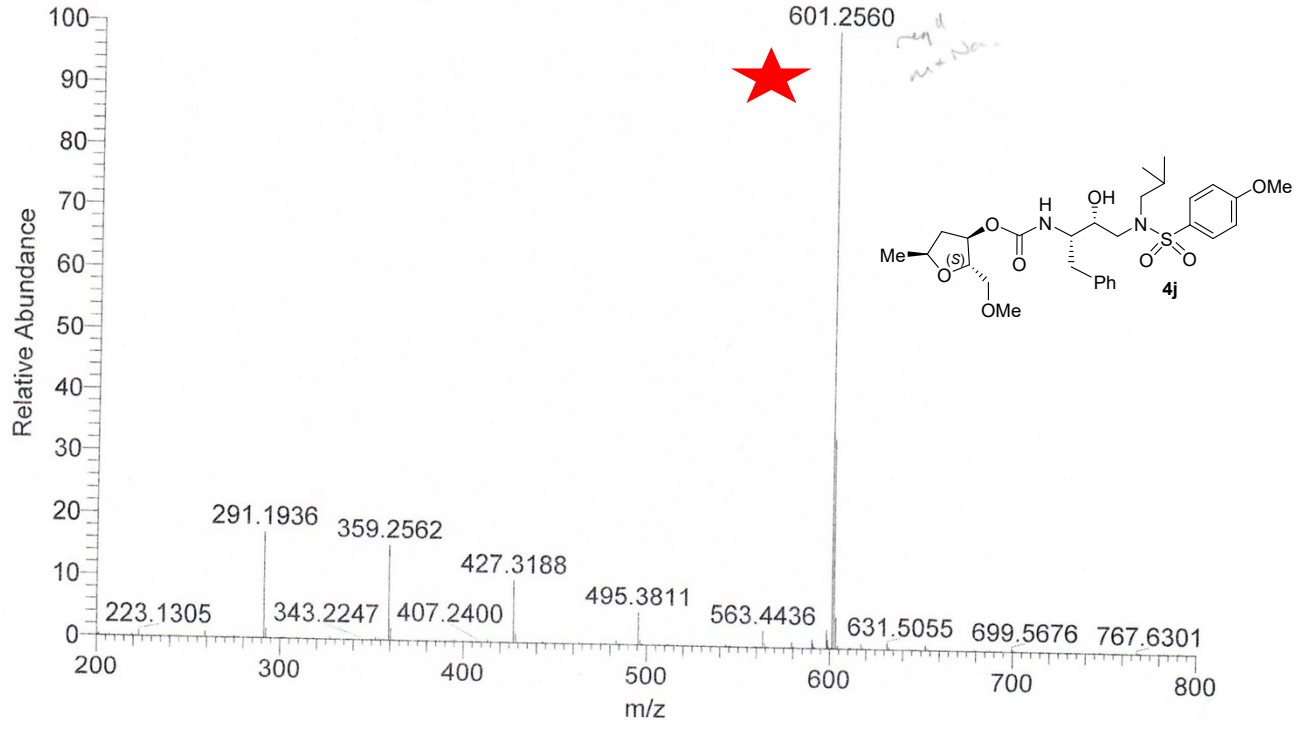

RIC-AS-12639\_ESI+\_MeOH\_ASH-OBC-4k #1-30 RT: 0.00-0.42 AV: 30 NL: 3.06E8  
 T: FTMS + p ESI Full ms [150.00-800.00]

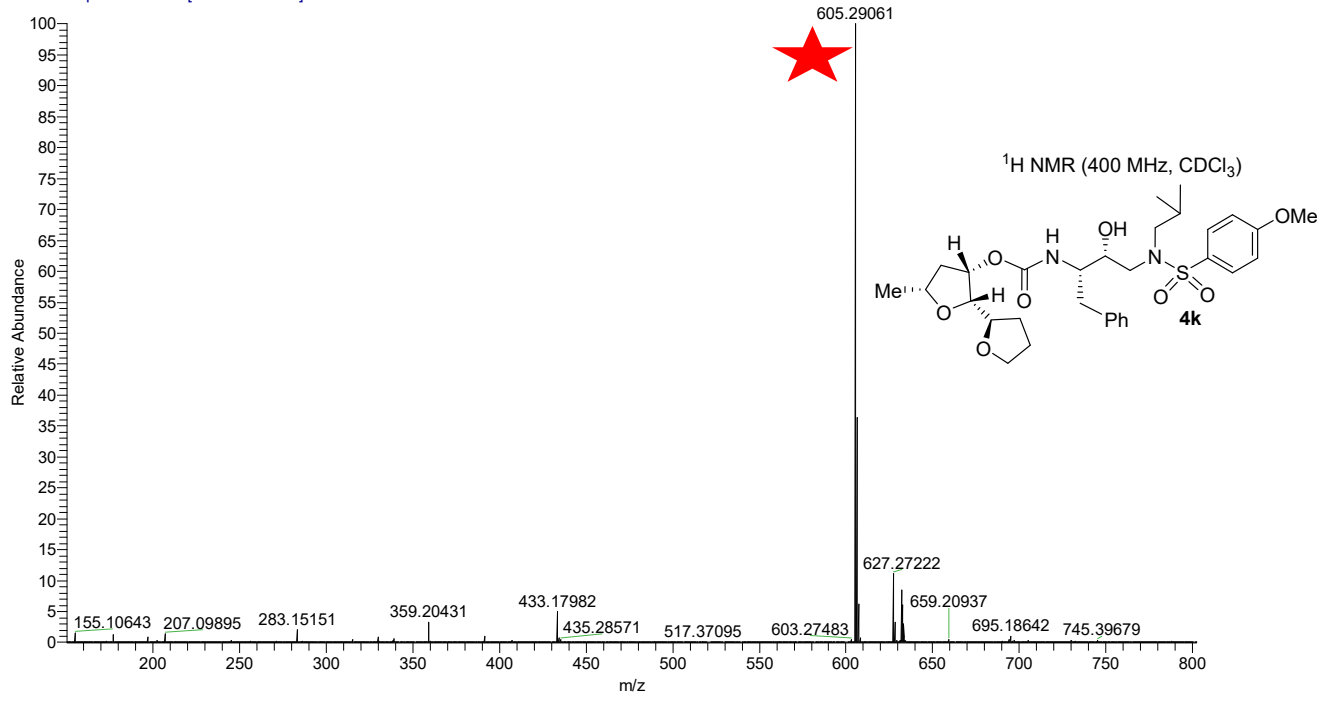

RIC-AS-12639\_ESI+ MeOH\_ASH-OBC-4L #1-30 RT: 0.01-0.42 AV: 30 NL: 1.40E7  
T: FTMS + p ESI Full ms [150.00-800.00]

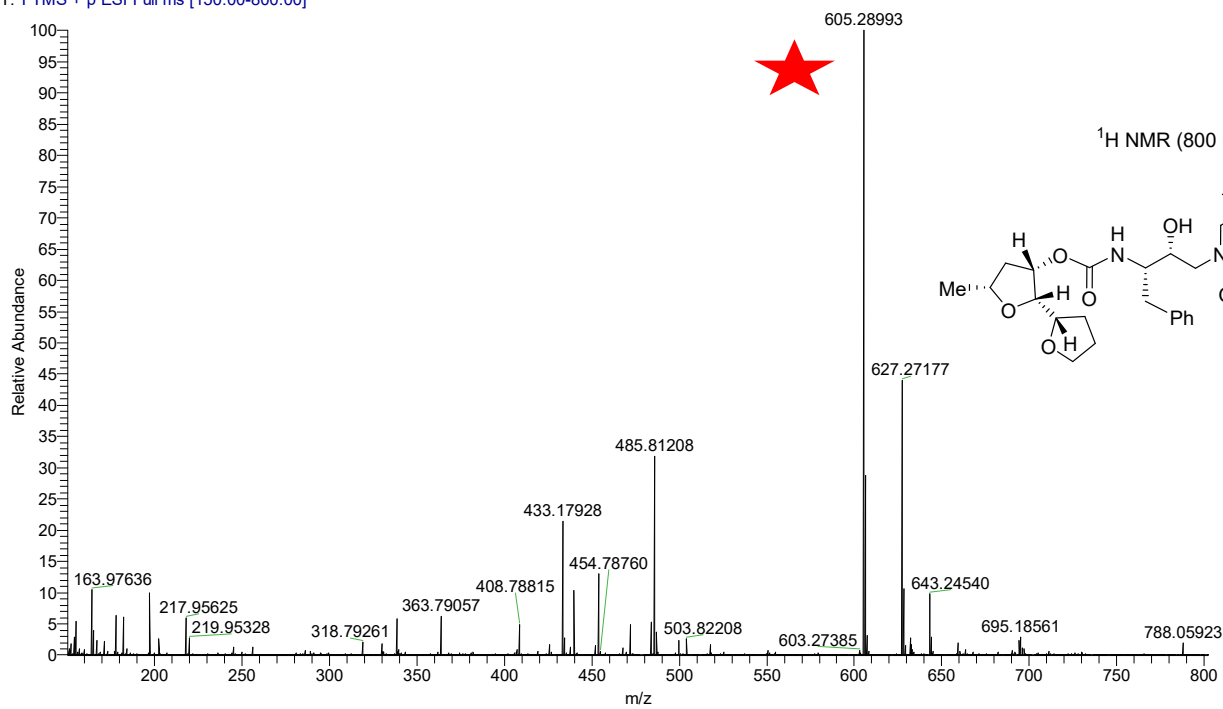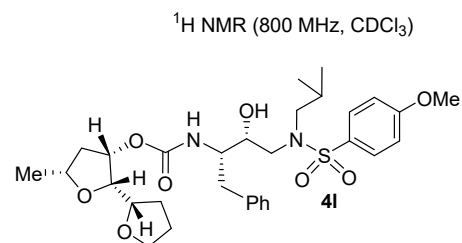

HPLC purity (Table 2, SI) data of inhibitors **4a-l**.

| <b>S.NO</b> | <b>Inhibitor</b> | <b>HPLC Purity</b> |
|-------------|------------------|--------------------|
| <b>1</b>    | <b>4a</b>        | <b>94%</b>         |
| <b>2</b>    | <b>4b</b>        | <b>92%</b>         |
| <b>3</b>    | <b>4c</b>        | <b>92%</b>         |
| <b>4</b>    | <b>4d</b>        | <b>92%</b>         |
| <b>5</b>    | <b>4e</b>        | <b>93%</b>         |
| <b>6</b>    | <b>4f</b>        | <b>92%</b>         |
| <b>7</b>    | <b>4g</b>        | <b>92%</b>         |
| <b>8</b>    | <b>4h</b>        | <b>92%</b>         |
| <b>9</b>    | <b>4i</b>        | <b>92%</b>         |
| <b>10</b>   | <b>4j</b>        | <b>92%</b>         |
| <b>11</b>   | <b>4k</b>        | <b>92%</b>         |
| <b>12</b>   | <b>4l</b>        | <b>93%</b>         |

=====  
Acq. Operator : SYSTEM  
Sample Operator : SYSTEM  
Acq. Instrument : LC2 Location : 1  
Injection Date : 6/7/2024 3:42:32 PM  
Inj Volume : 5.000 µl  
Acq. Method : C:\Chem32\1\Methods\AB-02-34A.M  
Last changed : 6/7/2024 3:39:35 PM by SYSTEM  
(modified after loading)  
Analysis Method : C:\Chem32\1\Methods\AB-02-34A.M  
Last changed : 6/7/2024 4:19:03 PM by SYSTEM  
(modified after loading)  
Method Info : Pump leak test method  
Sample Info : 50% MeCN/H2O  
1 mL/min  
254 nm  
5 uL inj.  
1.0 mL/min  
ymcpak-odsa

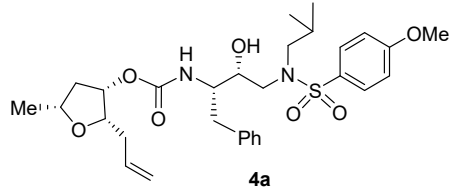

Concentration = 1 mg/mL of compound in  
ACN : H<sub>2</sub>O (1 : 1)

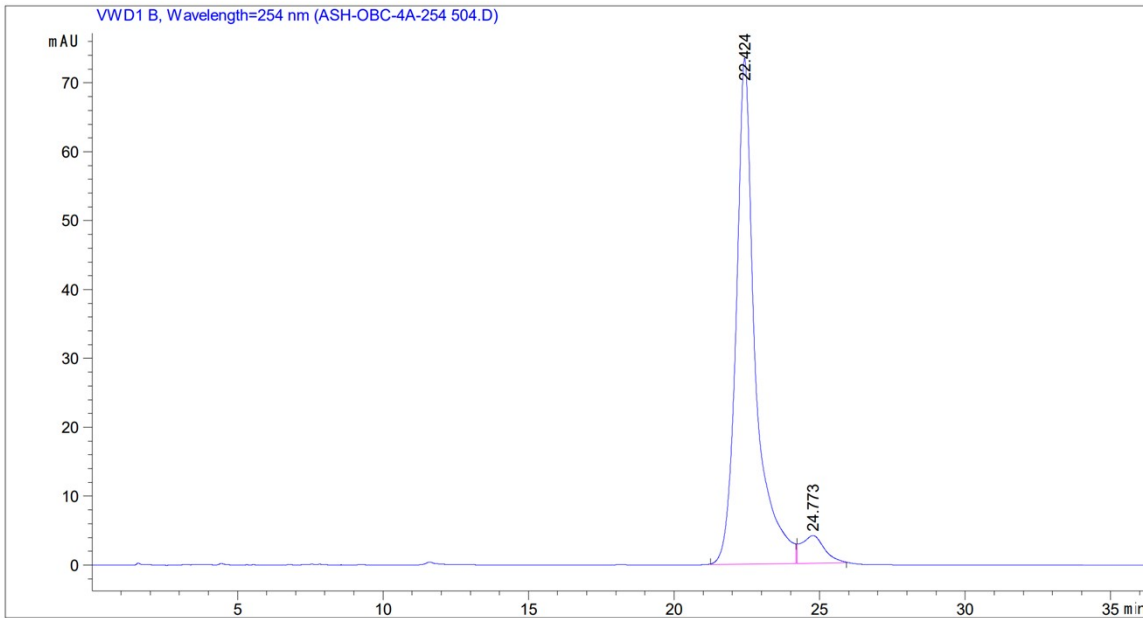

=====  
Area Percent Report  
=====

Sorted By : Signal  
Multiplier : 1.0000  
Dilution : 1.0000  
Sample Amount : 1.00000 [ng/ul] (not used in calc.)  
Use Multiplier & Dilution Factor with ISTDs

Signal 1: VWD1 B, Wavelength=254 nm

| Peak # | RetTime [min] | Type | Width [min] | Area [mAU*s] | Height [mAU] | Area %  |
|--------|---------------|------|-------------|--------------|--------------|---------|
| 1      | 22.424        | BB   | 0.6460      | 3347.90381   | 73.41902     | 93.7246 |
| 2      | 24.773        | BB   | 0.7943      | 224.16246    | 4.02157      | 6.2754  |

Totals :                    3572.06627   77.44059

=====  
\*\*\* End of Report \*\*\*

Data File C:\Chem32\1\Data\ASH-OBC-4B-254-NEW-2 527.D  
Sample Name: ASH-OBC-4B-254-NEW-2

=====  
Acq. Operator : SYSTEM  
Sample Operator : SYSTEM  
Acq. Instrument : LC2 Location : 1  
Injection Date : 6/10/2024 12:04:08 PM  
Inj Volume : 8.000 µl  
Different Inj Volume from Sample Entry! Actual Inj Volume : 5.000 µl  
Acq. Method : C:\Chem32\1\Methods\AB-02-34A.M  
Last changed : 6/10/2024 11:56:18 AM by SYSTEM  
(modified after loading)  
Analysis Method : C:\Chem32\1\Methods\AB-02-34A.M  
Last changed : 6/10/2024 12:34:30 PM by SYSTEM  
(modified after loading)  
Method Info : Pump leak test method

Sample Info : 50% MeCN/H2O  
1.0 mL/min  
254 nm  
8 µl inj.  
1.0 mL/min  
ymcpak-odsa

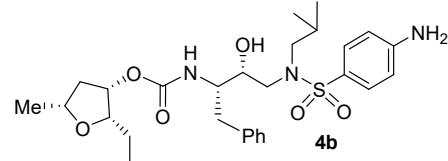

Concentration = 1 mg/mL of compound in  
ACN : H<sub>2</sub>O (1 : 1)

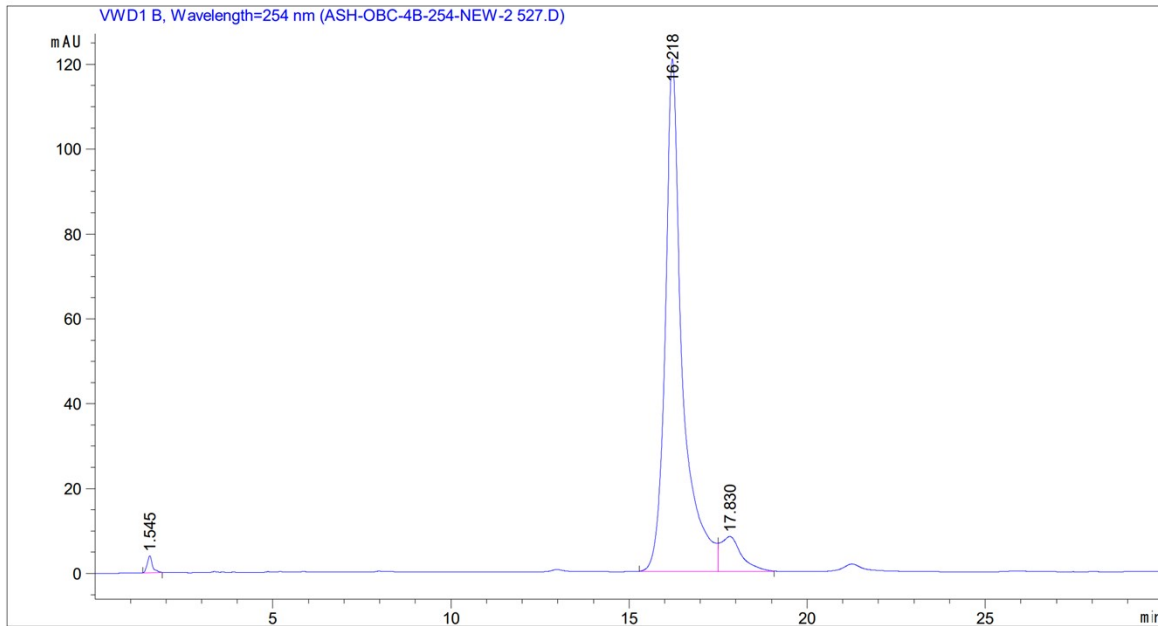

=====  
Area Percent Report  
=====

Sorted By : Signal  
Multiplier : 1.0000  
Dilution : 1.0000  
Sample Amount: : 1.00000 [ng/ul] (not used in calc.)  
Use Multiplier & Dilution Factor with ISTDs

Data File C:\Chem32\1\Data\ASH-OBC-4B-254-NEW-2 527.D  
Sample Name: ASH-OBC-4B-254-NEW-2

Signal 1: VWD1 B, Wavelength=254 nm

| Peak # | RetTime [min] | Type | Width [min] | Area [mAU*s] | Height [mAU] | Area %  |
|--------|---------------|------|-------------|--------------|--------------|---------|
| 1      | 1.545         | BB   | 0.1477      | 40.19727     | 3.98483      | 0.9102  |
| 2      | 16.218        | BB   | 0.4717      | 4033.29370   | 120.75713    | 91.3297 |
| 3      | 17.830        | BB   | 0.5817      | 342.69839    | 8.26544      | 7.7600  |

Totals :                    4416.18937 133.00740

=====  
\*\*\* End of Report \*\*\*

Data File C:\Chem32\1\Data\ASH-OBC-4C-254 503.D  
Sample Name: ASH-OBC-4C-254

=====  
Acq. Operator : SYSTEM  
Sample Operator : SYSTEM  
Acq. Instrument : LC2 Location : 1  
Injection Date : 6/7/2024 3:14:24 PM  
Inj Volume : 5.000 µl  
Acq. Method : C:\Chem32\1\Methods\AB-02-34A.M  
Last changed : 6/7/2024 3:03:25 PM by SYSTEM  
(modified after loading)  
Analysis Method : C:\Chem32\1\Methods\AB-02-34A.M  
Last changed : 6/7/2024 3:39:35 PM by SYSTEM  
(modified after loading)  
Method Info : Pump leak test method  
Sample Info : 50% MeCN/H2O  
1 mL/min  
254 nm  
5 uL inj.  
1.0 mL/min  
ymcpak-odsa

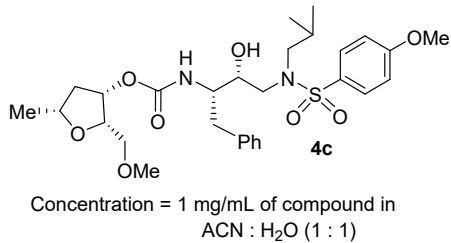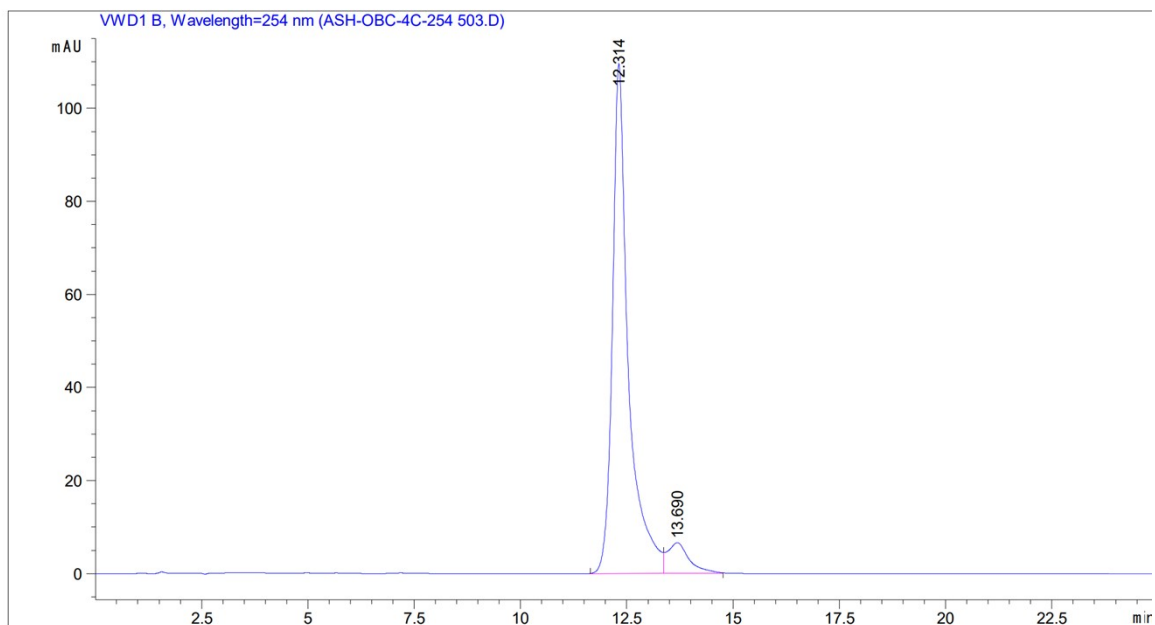

=====  
Area Percent Report  
=====

Sorted By : Signal  
Multiplier : 1.0000  
Dilution : 1.0000  
Sample Amount : 1.00000 [ng/ul] (not used in calc.)  
Use Multiplier & Dilution Factor with ISTDs



Sample Name: ASH-OBC-4C-254

Signal 1: VWD1 B, Wavelength=254 nm

| Peak # | RetTime [min] | Type | Width [min] | Area [mAU*s] | Height [mAU] | Area %  |
|--------|---------------|------|-------------|--------------|--------------|---------|
| 1      | 12.314        | BV   | 0.3696      | 2850.65918   | 109.54819    | 92.4342 |
| 2      | 13.690        | VB   | 0.4991      | 233.32800    | 6.59036      | 7.5658  |

Totals :                    3083.98718   116.13856

=====  
\*\*\* End of Report \*\*\*

Data File C:\Chem32\1\Data\ASH-OBC-4D-254 506.D  
Sample Name: ASH-OBC-4D-254

=====  
Acq. Operator : SYSTEM  
Sample Operator : SYSTEM  
Acq. Instrument : LC2 Location : 1  
Injection Date : 6/7/2024 4:49:48 PM Inj Volume : 5.000 µl  
Acq. Method : C:\Chem32\1\Methods\AB-02-34A.M  
Last changed : 6/7/2024 4:46:50 PM by SYSTEM  
(modified after loading)  
Analysis Method : C:\Chem32\1\Methods\AB-02-34A.M  
Last changed : 6/7/2024 5:17:39 PM by SYSTEM  
(modified after loading)  
Method Info : Pump leak test method  
Sample Info : 50% MeCN/H2O  
1 mL/min  
254 nm  
5 µl inj.  
1.0 mL/min  
ymcpak-odsa

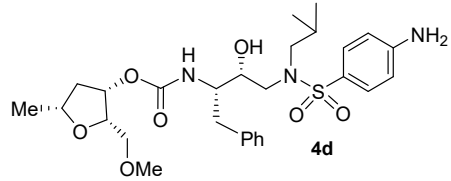

Concentration = 1 mg/mL of compound in  
ACN : H<sub>2</sub>O (1 : 1)

Additional Info : Peak(s) manually integrated

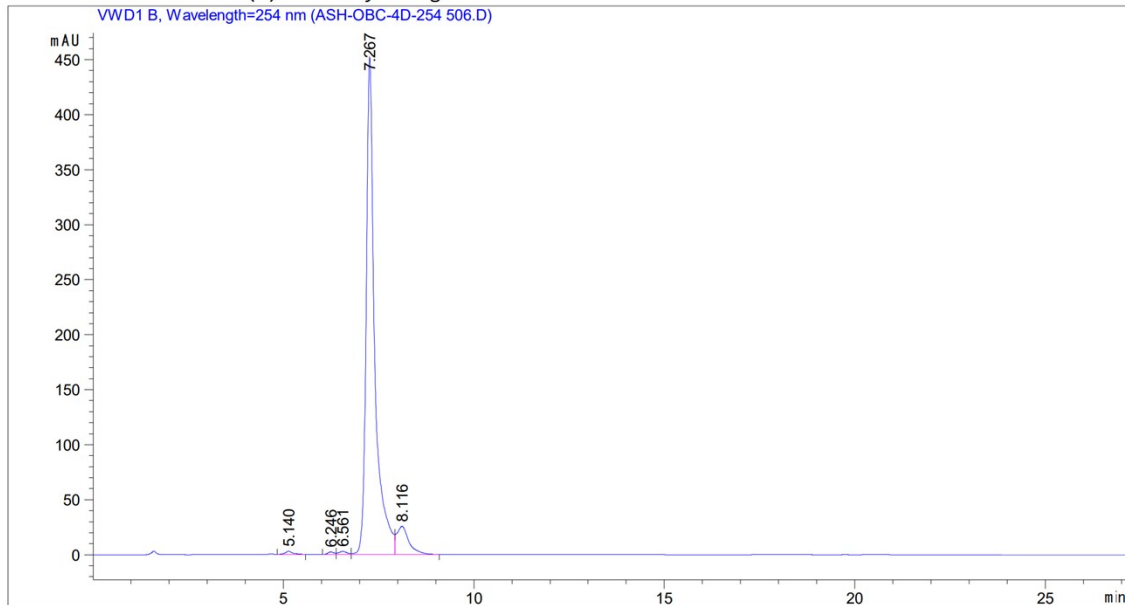

=====  
Area Percent Report  
=====

Sorted By : Signal  
Multiplier : 1.0000  
Dilution : 1.0000  
Sample Amount: : 1.00000 [ng/ul] (not used in calc.)  
Use Multiplier & Dilution Factor with ISTDs

Signal 1: VWD1 B, Wavelength=254 nm

| Peak # | RetTime [min] | Type | Width [min] | Area [mAU*s] | Height [mAU] | Area %  |
|--------|---------------|------|-------------|--------------|--------------|---------|
| 1      | 5.140         | VB   | 0.2000      | 39.90999     | 2.80452      | 0.5154  |
| 2      | 6.246         | BV   | 0.1628      | 25.37671     | 2.33571      | 0.3277  |
| 3      | 6.561         | VV   | 0.2155      | 41.59143     | 2.79735      | 0.5371  |
| 4      | 7.267         | VV   | 0.2244      | 7063.14893   | 451.75095    | 91.2196 |
| 5      | 8.116         | VB   | 0.3196      | 572.98694    | 25.55422     | 7.4001  |

Totals :                    7743.01400 485.24274

=====  
\*\*\* End of Report \*\*\*

Data File C:\Chem32\1\Data\ASH-OBC-4E-254 507.D  
Sample Name: ASH-OBC-4E-254

=====  
Acq. Operator : SYSTEM  
Sample Operator : SYSTEM  
Acq. Instrument : LC2 Location : 1  
Injection Date : 6/7/2024 5:19:58 PM  
Inj Volume : 5.000 µl  
Acq. Method : C:\Chem32\1\Methods\AB-02-34A.M  
Last changed : 6/7/2024 5:17:39 PM by SYSTEM  
(modified after loading)  
Analysis Method : C:\Chem32\1\Methods\AB-02-34A.M  
Last changed : 6/7/2024 5:51:34 PM by SYSTEM  
(modified after loading)  
Method Info : Pump leak test method  
Sample Info : 50% MeCN/H2O  
1 mL/min  
254 nm  
5 µl inj.  
1.0 mL/min  
ymcpak-odsa

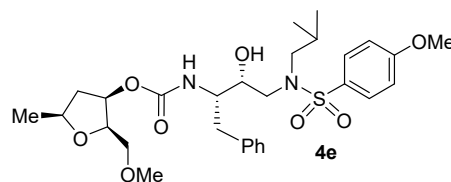

Concentration = 1 mg/mL of compound in  
ACN : H<sub>2</sub>O (1 : 1)

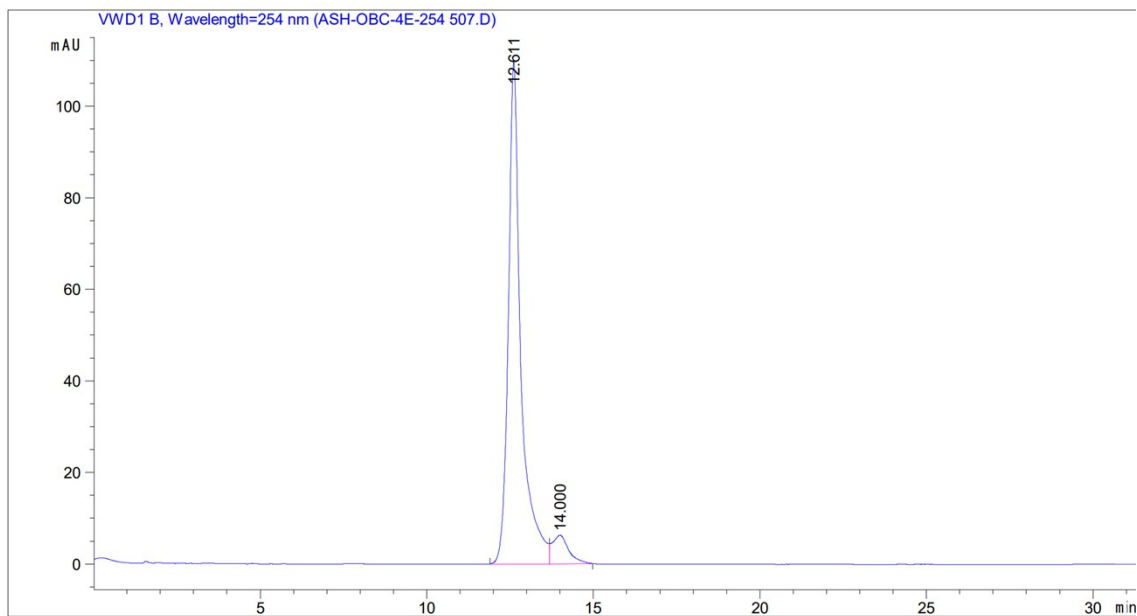

=====  
Area Percent Report  
=====

Sorted By : Signal  
Multiplier : 1.0000  
Dilution : 1.0000  
Sample Amount: : 1.00000 [ng/ul] (not used in calc.)  
Use Multiplier & Dilution Factor with ISTDs

Data File C:\Chem32\1\Data\ASH-OBC-4E-254 507.D  
Sample Name: ASH-OBC-4E-254

Signal 1: VWD1 B, Wavelength=254 nm

| Peak # | RetTime [min] | Type | Width [min] | Area [mAU*s] | Height [mAU] | Area %  |
|--------|---------------|------|-------------|--------------|--------------|---------|
| 1      | 12.611        | BV   | 0.3749      | 2883.74438   | 109.64135    | 92.9486 |
| 2      | 14.000        | VB   | 0.4923      | 218.77094    | 6.28154      | 7.0514  |

Totals :                    3102.51532  115.92289

=====  
\*\*\* End of Report \*\*\*

Data File C:\Chem32\1\Data\ASH-OBC-4F-254-NEW-3 532.D  
Sample Name: ASH-OBC-4F-254-NEW-3

=====  
Acq. Operator : SYSTEM  
Sample Operator : SYSTEM  
Acq. Instrument : LC2 Location : 1  
Injection Date : 6/10/2024 4:02:29 PM  
Inj Volume : 5.000 µl  
Acq. Method : C:\Chem32\1\Methods\AB-02-34A.M  
Last changed : 6/10/2024 3:51:57 PM by SYSTEM  
(modified after loading)  
Analysis Method : C:\Chem32\1\Methods\AB-02-34A.M  
Last changed : 6/10/2024 4:33:40 PM by SYSTEM  
(modified after loading)  
Method Info : Pump leak test method  
Sample Info : 45% MeCN/H2O  
1.0 mL/min  
254 nm  
5 µl inj.  
1.0 mL/min  
ymcpak-odsa

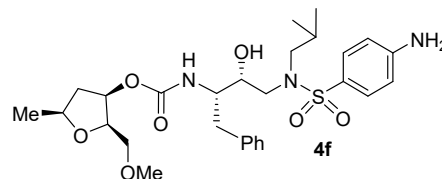

Concentration = 1 mg/mL of compound in  
ACN : H<sub>2</sub>O (1 : 1)

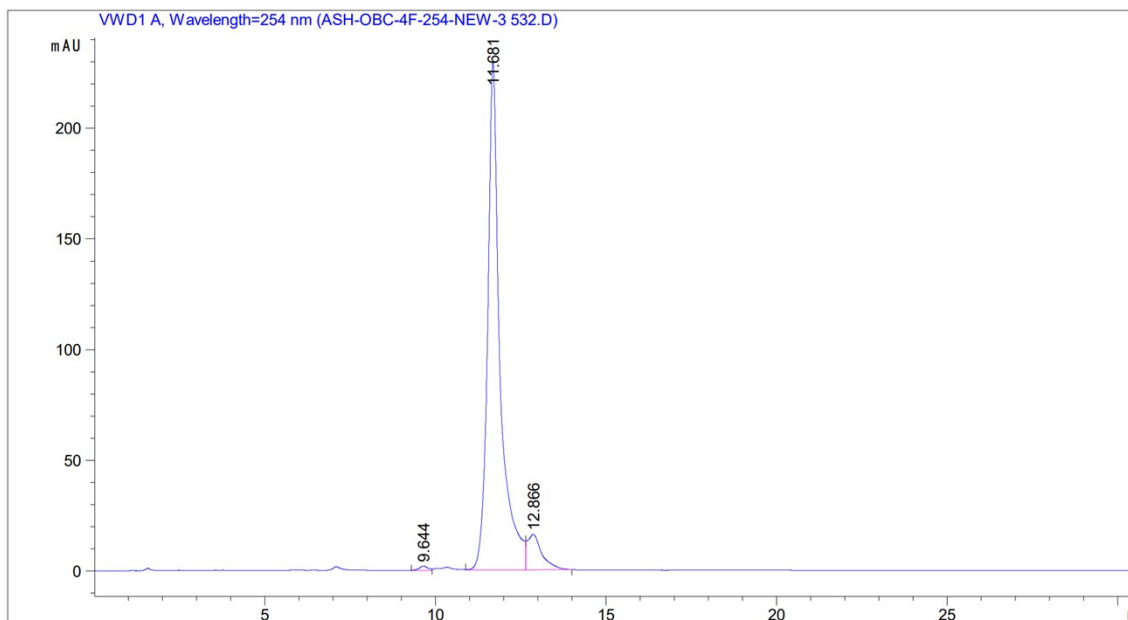

=====  
Area Percent Report  
=====

Sorted By : Signal  
Multiplier : 1.0000  
Dilution : 1.0000  
Sample Amount: : 1.00000 [ng/ul] (not used in calc.)  
Use Multiplier & Dilution Factor with ISTDs

Data File C:\Chem32\1\Data\ASH-OBC-4F-254-NEW-3 532.D  
Sample Name: ASH-OBC-4F-254-NEW-3

Signal 1: VWD1 A, Wavelength=254 nm

| Peak # | RetTime [min] | Type | Width [min] | Area [mAU*s] | Height [mAU] | Area %  |
|--------|---------------|------|-------------|--------------|--------------|---------|
| 1      | 9.644         | BV   | 0.2596      | 34.56042     | 1.94261      | 0.5452  |
| 2      | 11.681        | VV   | 0.3583      | 5821.04443   | 229.20386    | 91.8309 |
| 3      | 12.866        | VB   | 0.4174      | 483.26801    | 16.09259     | 7.6239  |

Totals :                    6338.87286 247.23906

=====  
\*\*\* End of Report \*\*\*

Data File C:\Chem32\1\Data\ASH-OBC-4G-254 511.D  
Sample Name: ASH-OBC-4G-254

=====  
Acq. Operator : SYSTEM  
Sample Operator : SYSTEM  
Acq. Instrument : LC2 Location : 1  
Injection Date : 6/7/2024 7:15:40 PM  
Inj Volume : 5.000 µl  
Acq. Method : C:\Chem32\1\Methods\AB-02-34A.M  
Last changed : 6/7/2024 7:14:28 PM by SYSTEM  
(modified after loading)  
Analysis Method : C:\Chem32\1\Methods\AB-02-34A.M  
Last changed : 6/8/2024 1:06:11 PM by SYSTEM  
(modified after loading)  
Method Info : Pump leak test method  
Sample Info : 60% MeCN/H2O  
1 mL/min  
254 nm  
5 uL inj.  
1.0 mL/min  
ymcpak-odsa

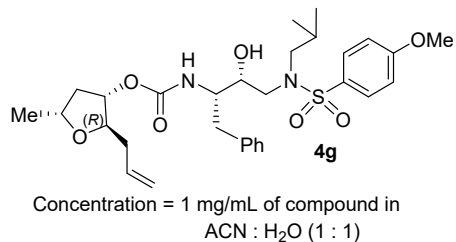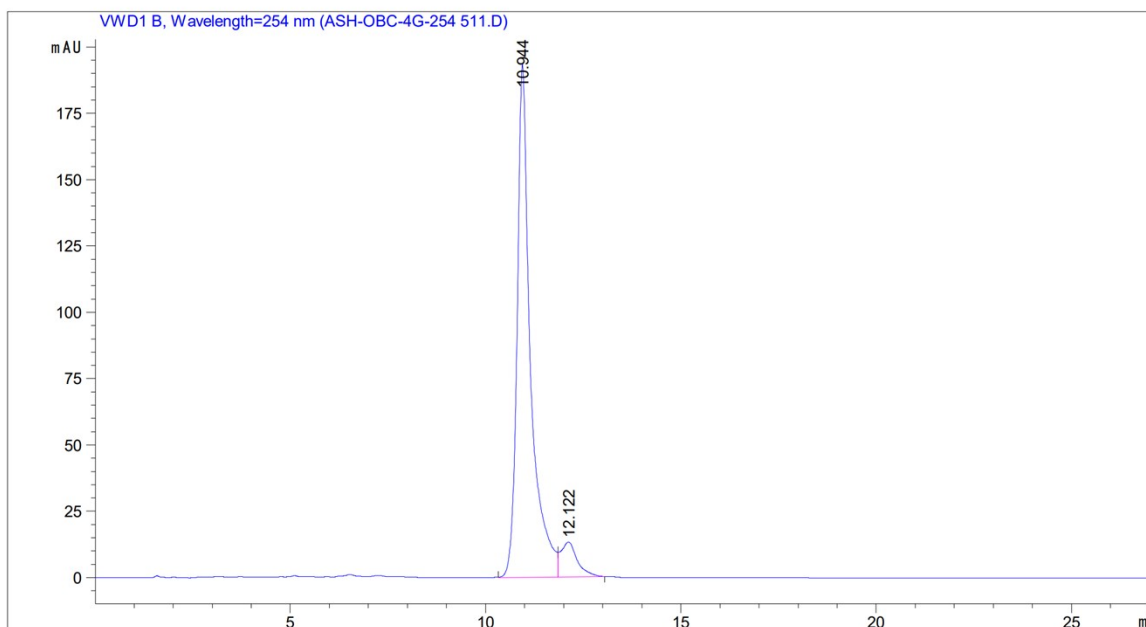

=====  
Area Percent Report  
=====

Sorted By : Signal  
Multiplier : 1.0000  
Dilution : 1.0000  
Sample Amount: : 1.00000 [ng/ul] (not used in calc.)  
Use Multiplier & Dilution Factor with ISTDs



Data File C:\Chem32\1\Data\ASH-OBC-4G-254 511.D  
Sample Name: ASH-OBC-4G-254

Signal 1: VWD1 B, Wavelength=254 nm

| Peak # | RetTime [min] | Type | Width [min] | Area [mAU*s] | Height [mAU] | Area %  |
|--------|---------------|------|-------------|--------------|--------------|---------|
| 1      | 10.944        | BV   | 0.3353      | 4591.29541   | 193.17729    | 92.2622 |
| 2      | 12.122        | VB   | 0.4154      | 385.06030    | 13.15954     | 7.7378  |

Totals :                    4976.35571  206.33683

=====  
\*\*\* End of Report \*\*\*

Data File C:\Chem32\1\Data\ASH-OBC-4H-254 517.D  
Sample Name: ASH-OBC-4H-254

=====  
Acq. Operator : SYSTEM  
Sample Operator : SYSTEM  
Acq. Instrument : LC2 Location : 1  
Injection Date : 6/8/2024 3:06:11 PM  
Inj Volume : 5.000 µl  
Acq. Method : C:\Chem32\1\Methods\AB-02-34A.M  
Last changed : 6/8/2024 3:04:35 PM by SYSTEM  
(modified after loading)  
Analysis Method : C:\Chem32\1\Methods\AB-02-34A.M  
Last changed : 6/8/2024 3:35:26 PM by SYSTEM  
(modified after loading)  
Method Info : Pump leak test method  
Sample Info : 55% MeCN/H2O  
1 mL/min  
254 nm  
5 µL inj.  
1.0 mL/min  
ymcpak-odsa

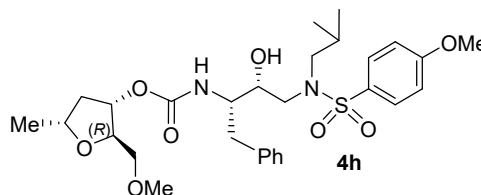

Concentration = 1 mg/mL of compound in  
ACN : H<sub>2</sub>O (1 : 1)

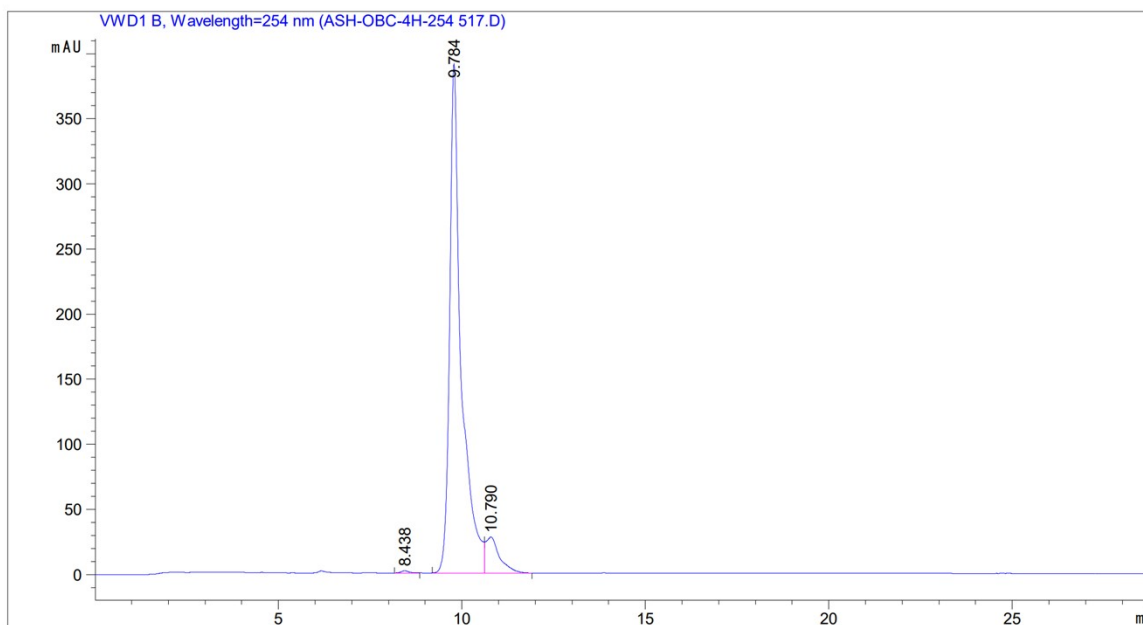

=====  
Area Percent Report  
=====

Sorted By : Signal  
Multiplier : 1.0000  
Dilution : 1.0000  
Sample Amount : 1.00000 [ng/ul] (not used in calc.)  
Use Multiplier & Dilution Factor with ISTDs

Data File C:\Chem32\1\Data\ASH-OBC-4H-254 517.D  
Sample Name: ASH-OBC-4H-254

Signal 1: VWD1 B, Wavelength=254 nm

| Peak # | RetTime [min] | Type | Width [min] | Area [mAU*s] | Height [mAU] | Area %  |
|--------|---------------|------|-------------|--------------|--------------|---------|
| 1      | 8.438         | BB   | 0.2235      | 26.27509     | 1.72747      | 0.2791  |
| 2      | 9.784         | BV   | 0.3103      | 8653.25684   | 390.81973    | 91.9159 |
| 3      | 10.790        | VB   | 0.3718      | 734.78949    | 27.67530     | 7.8050  |

Totals :                            9414.32142   420.22251

=====  
\*\*\* End of Report \*\*\*

Data File C:\Chem32\1\Data\ASH-OBC-4I-254 518.D  
Sample Name: ASH-OBC-4I-254

=====  
Acq. Operator : SYSTEM  
Sample Operator : SYSTEM  
Acq. Instrument : LC2 Location : 1  
Injection Date : 6/8/2024 3:58:33 PM Inj Volume : 5.000 µl  
Acq. Method : C:\Chem32\1\Methods\AB-02-34A.M  
Last changed : 6/8/2024 3:46:42 PM by SYSTEM  
(modified after loading)  
Analysis Method : C:\Chem32\1\Methods\AB-02-34A.M  
Last changed : 6/8/2024 4:24:31 PM by SYSTEM  
(modified after loading)  
Method Info : Pump leak test method  
Sample Info : 50% MeCN/H2O  
1 mL/min  
254 nm  
5 uL inj.  
1.0 mL/min  
ymcpak-odsa

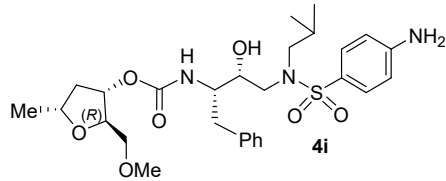

Concentration = 1 mg/mL of compound in  
ACN : H<sub>2</sub>O (1 : 1)

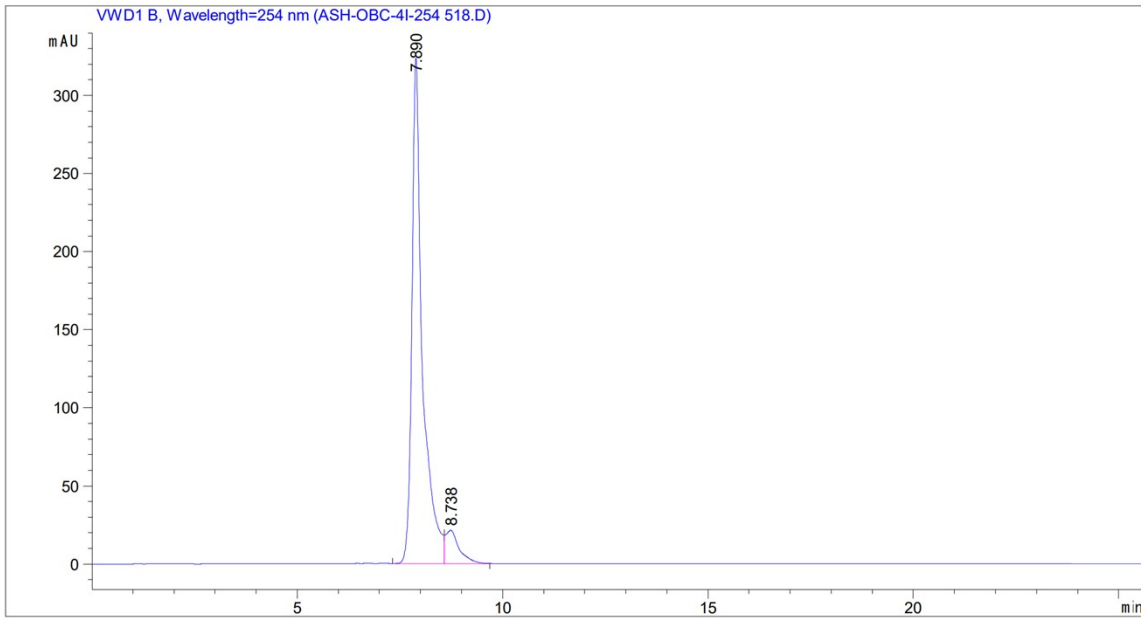

=====  
Area Percent Report  
=====

Sorted By : Signal  
Multiplier : 1.0000  
Dilution : 1.0000  
Sample Amount : 1.00000 [ng/ul] (not used in calc.)  
Use Multiplier & Dilution Factor with ISTDs

Data File C:\Chem32\1\Data\ASH-OBC-4I-254 518.D  
Sample Name: ASH-OBC-4I-254

Signal 1: VWD1 B, Wavelength=254 nm

| Peak # | RetTime [min] | Type | Width [min] | Area [mAU*s] | Height [mAU] | Area %  |
|--------|---------------|------|-------------|--------------|--------------|---------|
| 1      | 7.890         | VV   | 0.2521      | 5774.38965   | 323.73325    | 92.0484 |
| 2      | 8.738         | VB   | 0.3283      | 498.82303    | 21.36840     | 7.9516  |

Totals :                    6273.21268  345.10165

=====  
\*\*\* End of Report \*\*\*

Data File C:\Chem32\1\Data\ASH-OBC-4J-254 519.D  
Sample Name: ASH-OBC-4J-254

=====  
Acq. Operator : SYSTEM  
Sample Operator : SYSTEM  
Acq. Instrument : LC2 Location : 1  
Injection Date : 6/8/2024 4:41:09 PM Inj Volume : 5.000 µl  
Acq. Method : C:\Chem32\1\Methods\AB-02-34A.M  
Last changed : 6/8/2024 4:24:31 PM by SYSTEM  
(modified after loading)  
Analysis Method : C:\Chem32\1\Methods\AB-02-34A.M  
Last changed : 6/8/2024 5:06:55 PM by SYSTEM  
(modified after loading)  
Method Info : Pump leak test method  
Sample Info : 50% MeCN/H2O  
1 mL/min  
254 nm  
5 uL inj.  
1.0 mL/min  
ymcpak-odsa

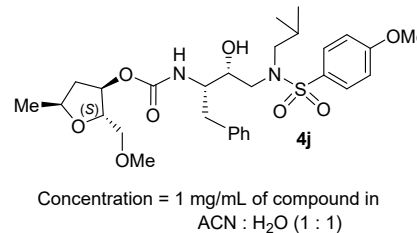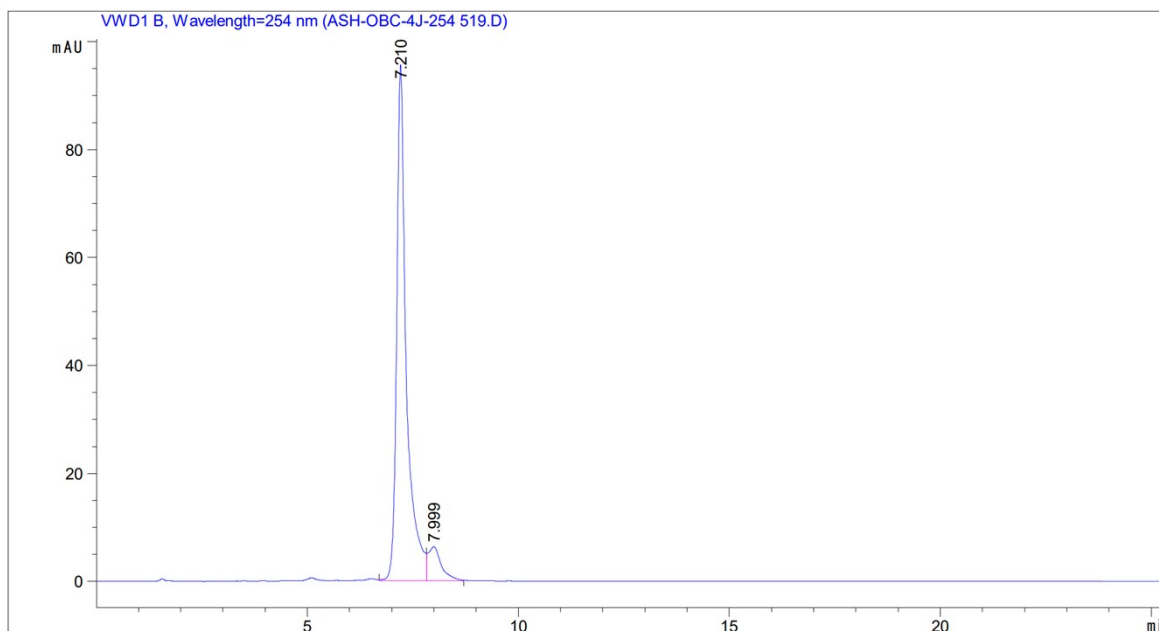

=====  
Area Percent Report  
=====

Sorted By : Signal  
Multiplier : 1.0000  
Dilution : 1.0000  
Sample Amount: : 1.00000 [ng/ul] (not used in calc.)  
Use Multiplier & Dilution Factor with ISTDs

Data File C:\Chem32\1\Data\ASH-OBC-4J-254 519.D  
Sample Name: ASH-OBC-4J-254

Signal 1: VWD1 B, Wavelength=254 nm

| Peak # | RetTime [min] | Type | Width [min] | Area [mAU*s] | Height [mAU] | Area %  |
|--------|---------------|------|-------------|--------------|--------------|---------|
| 1      | 7.210         | VV   | 0.2273      | 1518.76587   | 95.61581     | 91.7905 |
| 2      | 7.999         | VB   | 0.3058      | 135.83417    | 6.29474      | 8.2095  |

Totals :                   1654.60004 101.91054

=====  
\*\*\* End of Report \*\*\*

=====  
Acq. Operator : SYSTEM  
Sample Operator : SYSTEM  
Acq. Instrument : LC2 Location : 1  
Injection Date : 6/11/2024 12:20:39 PM  
Inj Volume : 5.000 µl  
Acq. Method : C:\Chem32\1\Methods\AB-02-34A.M  
Last changed : 6/11/2024 12:19:49 PM by SYSTEM  
(modified after loading)  
Analysis Method : C:\Chem32\1\Methods\AB-02-34A.M  
Last changed : 6/11/2024 2:41:19 PM by SYSTEM  
(modified after loading)  
Method Info : Pump leak test method  
Sample Info : 50% MeCN/H2O  
1.0 mL/min  
254 nm  
5 uL inj.  
1.0 mL/min  
ymcpak-odsa

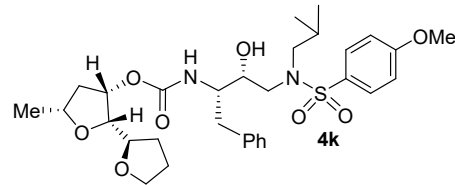

Concentration = 0.8 mg/mL of compound in  
ACN : H<sub>2</sub>O (1 : 1)

Additional Info : Peak(s) manually integrated  
VWD1 A, Wavelength=254 nm (ASH-OBC-4K-254-12 539.D)

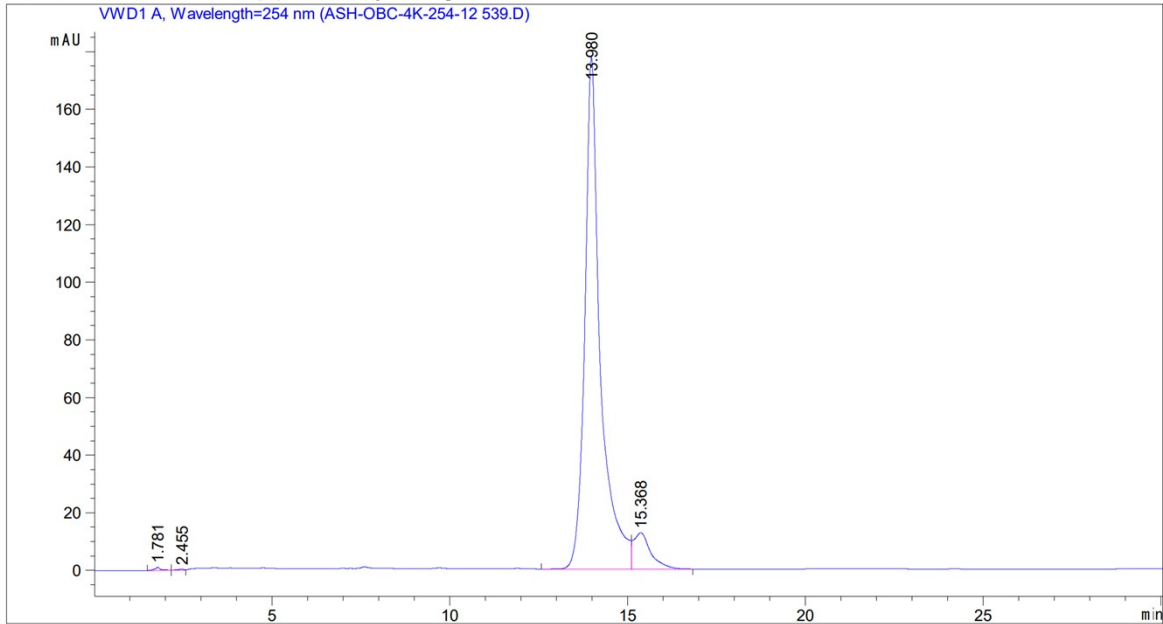

=====  
Area Percent Report  
=====

Sorted By : Signal  
Multiplier : 1.0000  
Dilution : 1.0000  
Sample Amount: : 1.00000 [ng/ul] (not used in calc.)  
Use Multiplier & Dilution Factor with ISTDs



Data File C:\Chem32\1\Data\ASH-OBC-4K-254-12 539.D  
Sample Name: ASH-OBC-4K-254-12

Signal 1: VWD1 A, Wavelength=254 nm

| Peak # | RetTime [min] | Type | Width [min] | Area [mAU*s] | Height [mAU] | Area %  |
|--------|---------------|------|-------------|--------------|--------------|---------|
| 1      | 1.781         | BB   | 0.1468      | 12.47250     | 1.11284      | 0.2138  |
| 2      | 2.455         | BV   | 0.2072      | 4.74914      | 3.43689e-1   | 0.0814  |
| 3      | 13.980        | VV   | 0.4281      | 5388.28711   | 177.54451    | 92.3706 |
| 4      | 15.368        | VB   | 0.4793      | 427.82523    | 12.62603     | 7.3341  |

Totals :                    5833.33398 191.62706

=====  
\*\*\* End of Report \*\*\*

Data File C:\Chem32\1\Data\ASH-OBC-4L-254 520.D  
Sample Name: ASH-OBC-4L-254

=====  
Acq. Operator : SYSTEM  
Sample Operator : SYSTEM  
Acq. Instrument : LC2 Location : 1  
Injection Date : 6/8/2024 5:21:35 PM  
Inj Volume : 5.000 µl  
Acq. Method : C:\Chem32\1\Methods\AB-02-34A.M  
Last changed : 6/8/2024 5:06:55 PM by SYSTEM  
(modified after loading)  
Analysis Method : C:\Chem32\1\Methods\AB-02-34A.M  
Last changed : 6/8/2024 5:52:33 PM by SYSTEM  
(modified after loading)  
Method Info : Pump leak test method  
Sample Info : 50% MeCN/H2O  
1 mL/min  
254 nm  
5 µL inj.  
1.0 mL/min  
ymcpak-odsa

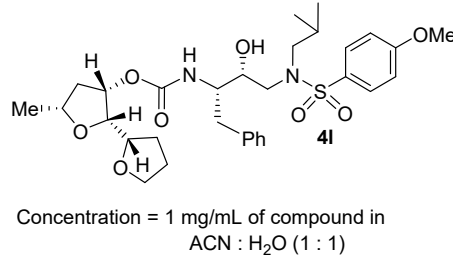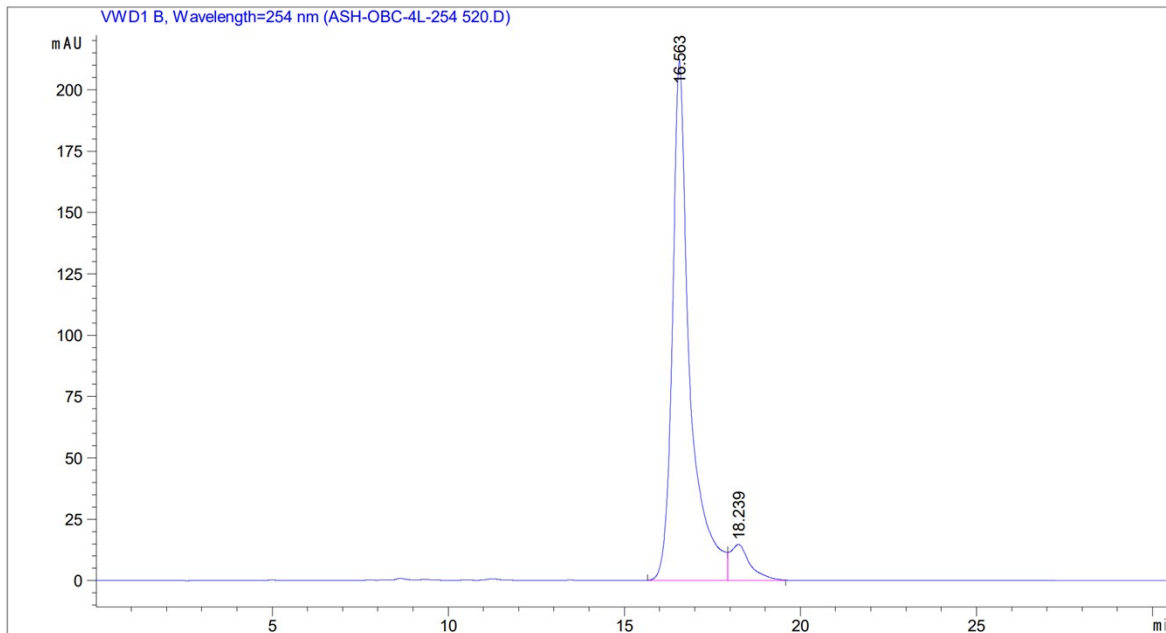

=====  
Area Percent Report  
=====

Sorted By : Signal  
Multiplier : 1.0000  
Dilution : 1.0000  
Sample Amount : 1.00000 [ng/ul] (not used in calc.)  
Use Multiplier & Dilution Factor with ISTDs

Data File C:\Chem32\1\Data\ASH-OBC-4L-254 520.D  
Sample Name: ASH-OBC-4L-254

Signal 1: VWD1 B, Wavelength=254 nm

| Peak # | RetTime [min] | Type | Width [min] | Area [mAU*s] | Height [mAU] | Area %  |
|--------|---------------|------|-------------|--------------|--------------|---------|
| 1      | 16.563        | BV   | 0.4878      | 7291.14063   | 211.69453    | 92.6870 |
| 2      | 18.239        | VB   | 0.5549      | 575.26935    | 14.62415     | 7.3130  |

Totals :                                7866.40997   226.31868

=====  
\*\*\* End of Report \*\*\*
